# Supplementary material
Source: HighWire-hosted journal article supplement (doi:10.1101/rna.080661.125)
Supplement: Supplemental_al_Table_S3.xlsx [file Supplemental_al_Table_S3.xlsx]

## Sheet: גיליון1
Supplementary Table S2: Significant differentially expressed genes in SF3B1-K700E K562 cells
Gene	baseMean	log2FoldChange	lfcSE	stat	pvalue	padj
ENSG00000238164.6_11	56.5298	-2.61748	0.826183	-3.16816	0.00153408	0.0590961
ENSG00000116285.13_6	1706.49	2.22122	0.503743	4.40942	1.03646e-05	0.00110888
ENSG00000272482.1_6	184.934	1.35104	0.420444	3.21336	0.00131192	0.0526939
ENSG00000189337.17_8	3122.03	-1.33805	0.44226	-3.02549	0.00248229	0.0809219
ENSG00000175147.13_9	206.328	1.8036	0.59521	3.03019	0.00244404	0.0806344
ENSG00000171729.14_7	900.942	1.46397	0.329109	4.44828	8.65608e-06	0.000952048
ENSG00000142621.19_6	729.887	2.11593	0.325452	6.50152	7.95112e-11	4.45584e-08
ENSG00000162458.13_7	450.339	1.45787	0.362283	4.02413	5.71855e-05	0.00451669
ENSG00000233421.4_7	201.66	2.20896	0.514871	4.29032	1.78415e-05	0.00172812
ENSG00000117148.8_5	1130.55	4.00054	1.19426	3.34981	0.000808678	0.0368873
ENSG00000117215.15_6	242.327	2.22083	0.613804	3.61814	0.000296724	0.0172086
ENSG00000187980.6_5	205.489	1.26834	0.416428	3.04576	0.00232093	0.0784427
ENSG00000162543.6_5	12308.3	0.893111	0.261397	3.41668	0.00063389	0.0306363
ENSG00000162551.14_7	395.737	1.41914	0.38877	3.65032	0.00026191	0.0156461
ENSG00000162510.6_6	654.075	1.08449	0.355366	3.05176	0.00227505	0.0774551
ENSG00000142910.16_5	1782.35	1.00318	0.288682	3.47504	0.000510777	0.0256336
ENSG00000134668.12_7	714.312	1.89726	0.326405	5.81259	6.15141e-09	1.88033e-06
ENSG00000142920.17_5	549.563	1.63534	0.341967	4.78215	1.7343e-06	0.000250431
ENSG00000187513.9_6	213.868	1.76391	0.544661	3.23855	0.00120139	0.0499443
ENSG00000163879.11_6	137.642	2.11466	0.585372	3.61251	0.00030325	0.0174513
ENSG00000116983.13_6	372.482	1.6563	0.512463	3.23204	0.00122911	0.0506648
ENSG00000284719.1_6	362.274	1.81672	0.389371	4.66577	3.0746e-06	0.000406845
ENSG00000243710.8_7	80.4221	1.63346	0.545336	2.99533	0.0027415	0.0870804
ENSG00000179178.11_6	314.783	1.53039	0.365458	4.18761	2.81913e-05	0.00252296
ENSG00000066056.14_5	191.272	2.26035	0.521534	4.33403	1.46403e-05	0.0014726
ENSG00000282881.2_9	22.1639	8.47106	2.29809	3.68613	0.000227689	0.0139888
ENSG00000143006.7_3	56.9376	3.77109	0.757565	4.97791	6.42759e-07	0.000104335
ENSG00000162399.9_8	15.5896	4.50261	1.5084	2.98502	0.00283562	0.0892273
ENSG00000237352.4_8	174.676	1.83461	0.459436	3.99319	6.51911e-05	0.00501439
ENSG00000226891.9_11	111.739	1.5818	0.494259	3.20036	0.00137258	0.0542964
ENSG00000118473.22_7	113.842	3.20947	0.800881	4.00742	6.13848e-05	0.00480005
ENSG00000172380.6_6	6412.78	3.07173	0.386105	7.95567	1.78158e-15	3.60722e-12
ENSG00000162595.7_8	2684.86	1.27508	0.272576	4.67788	2.89853e-06	0.000389844
ENSG00000287453.1_1	78.7007	2.57045	0.660101	3.89403	9.85923e-05	0.00711831
ENSG00000233061.1_8	26.077	6.25739	1.76754	3.54016	0.000399888	0.0219398
ENSG00000122417.15_11	808.277	1.71999	0.486623	3.53454	0.000408481	0.0222852
ENSG00000016490.16_5	123.489	4.02009	0.799516	5.02816	4.95215e-07	8.50794e-05
ENSG00000154451.14_6	2725.83	2.24597	0.436453	5.14595	2.66167e-07	5.01181e-05
ENSG00000117525.14_6	193.623	3.30108	0.560802	5.88636	3.94792e-09	1.32873e-06
ENSG00000117543.21_8	4029.59	-1.24868	0.262501	-4.75686	1.96625e-06	0.000278793
ENSG00000156171.14_5	11146.6	-0.728779	0.245082	-2.97361	0.00294314	0.0910036
ENSG00000215866.8_8	461.006	-0.930059	0.312793	-2.9734	0.00294521	0.0910036
ENSG00000198857.3_4	46.3678	2.30042	0.70119	3.28074	0.00103536	0.0446322
ENSG00000092621.13_6	36620.6	-1.78504	0.408449	-4.37028	1.24085e-05	0.0012866
ENSG00000272583.1_7	76.4649	2.12517	0.580545	3.66064	0.000251585	0.0151835
ENSG00000278811.4_8	2202.21	1.74031	0.583969	2.98015	0.00288112	0.090057
ENSG00000162836.12_8	637.729	1.35801	0.436741	3.10943	0.00187449	0.0678918
ENSG00000265107.3_6	55.0695	3.99107	1.04812	3.80783	0.00014019	0.0095091
ENSG00000160712.13_6	938.136	1.3258	0.297147	4.46176	8.12878e-06	0.00089825
ENSG00000163565.18_7	884.026	3.60124	0.553135	6.5106	7.48503e-11	4.29695e-08
ENSG00000163568.15_7	132.866	5.01342	0.898463	5.58	2.40525e-08	6.22113e-06
ENSG00000158714.11_6	66.7144	2.49213	0.696605	3.57753	0.000346851	0.0195775
ENSG00000117091.10_7	206.499	1.95049	0.399402	4.88352	1.0421e-06	0.000159272
ENSG00000158869.11_5	389.081	-2.04683	0.479036	-4.27282	1.9302e-05	0.00186193
ENSG00000198574.6_6	1328.77	2.30438	0.565476	4.07512	4.59907e-05	0.00382503
ENSG00000185630.19_7	7645.66	3.05545	0.464548	6.57727	4.7917e-11	2.96795e-08
ENSG00000076258.10_5	140.131	1.94058	0.551805	3.5168	0.000436788	0.0232069
ENSG00000117601.13_4	383.022	-1.95798	0.336777	-5.81387	6.10436e-09	1.88033e-06
ENSG00000116701.15_5	229.439	1.20716	0.40869	2.95373	0.0031396	0.0957212
ENSG00000047410.14_6	48456.8	-1.05003	0.239982	-4.37545	1.21184e-05	0.00126208
ENSG00000229191.1_6	536.266	2.14227	0.460426	4.6528	3.2746e-06	0.000425824
ENSG00000174307.7_6	21.4677	3.95271	1.19762	3.30046	0.000965254	0.0423865
ENSG00000143850.16_10	393.974	1.44948	0.478586	3.02866	0.00245637	0.0806344
ENSG00000170382.12_6	300.374	1.58363	0.475249	3.33222	0.000861559	0.0386995
ENSG00000240219.1_6	327.116	2.49081	0.373095	6.67607	2.45427e-11	1.65046e-08
ENSG00000133069.17_8	1102.05	-1.41166	0.387653	-3.64156	0.00027099	0.0160258
ENSG00000281406.2_7	2154.47	1.42759	0.468649	3.04618	0.00231771	0.0784427
ENSG00000162894.12_8	133.742	1.71497	0.488078	3.51371	0.000441892	0.0233726
ENSG00000182795.13_6	6498.85	2.20204	0.398056	5.53199	3.16614e-08	7.92782e-06
ENSG00000174059.17_9	26.1917	3.21922	1.0129	3.17824	0.00148174	0.0573615
ENSG00000170385.10_6	3506.25	-0.8765	0.287222	-3.05165	0.00227589	0.0774551
ENSG00000066027.12_6	7969.17	-1.14876	0.251789	-4.5624	5.05712e-06	0.000613553
ENSG00000198468.9_9	1180.42	0.916632	0.263245	3.48204	0.000497605	0.0251333
ENSG00000232679.2_8	69.172	2.79727	0.620693	4.50669	6.58471e-06	0.000752965
ENSG00000143786.8_6	148.911	2.18389	0.496374	4.39969	1.08405e-05	0.00115454
ENSG00000233355.7_11	204.34	-2.10069	0.487832	-4.30617	1.66108e-05	0.00163585
ENSG00000196242.10_9	180.299	3.14228	0.806177	3.89775	9.70914e-05	0.00704514
ENSG00000229703.6_9	324.247	1.63433	0.458711	3.56288	0.000366812	0.0203145
ENSG00000171161.13_7	24478.6	0.926016	0.249996	3.70413	0.000212119	0.0132783
ENSG00000185220.12_6	7940.58	0.775637	0.257134	3.01647	0.00255738	0.0827965
ENSG00000228203.7_8	2402.84	1.02235	0.342771	2.98261	0.00285797	0.0896908
ENSG00000196208.14_5	405.287	1.20451	0.329359	3.65714	0.000255043	0.0153528
ENSG00000143878.10_5	1313.7	1.43935	0.31729	4.53638	5.7228e-06	0.000676872
ENSG00000229621.2_8	22.6258	3.43068	1.06524	3.22057	0.00127936	0.0518284
ENSG00000115194.11_9	868.8	0.989203	0.310942	3.18131	0.00146611	0.0569405
ENSG00000138100.14_4	74.8226	2.76137	0.7888	3.50072	0.000464007	0.0241622
ENSG00000163803.13_9	530.043	3.36394	0.571496	5.8862	3.9517e-09	1.32873e-06
ENSG00000115295.20_6	347.76	3.41841	0.518511	6.59274	4.31788e-11	2.74676e-08
ENSG00000234362.6_8	211.498	2.04243	0.527059	3.87515	0.000106559	0.0075092
ENSG00000205054.8_8	201.781	1.96914	0.580476	3.39228	0.000693124	0.0326281
ENSG00000282828.2_8	10.5141	-7.46973	2.09353	-3.56801	0.000359703	0.0201101
ENSG00000003137.8_8	213.013	2.66578	0.771377	3.45587	0.000548525	0.0270663
ENSG00000176204.13_6	50.8963	-2.61188	0.809375	-3.22704	0.0012508	0.0510227
ENSG00000115423.19_6	242.632	3.12405	0.56082	5.57049	2.54019e-08	6.49875e-06
ENSG00000034510.6_5	78372.2	0.750913	0.235826	3.18419	0.00145161	0.0565672
ENSG00000115486.12_6	9720.21	0.941836	0.254027	3.70762	0.000209212	0.0131313
ENSG00000144218.19_7	347.766	1.79207	0.491958	3.64274	0.000269749	0.0159926
ENSG00000115594.12_9	1280.87	1.47895	0.396556	3.72948	0.000191874	0.0122721
ENSG00000115008.6_5	1228.09	1.75706	0.580183	3.02846	0.00245804	0.0806344
ENSG00000125538.12_9	162.544	1.29455	0.430845	3.00467	0.00265869	0.0848821
ENSG00000152128.13_6	1379.71	1.25017	0.367487	3.40195	0.000669074	0.0319381
ENSG00000231890.8_8	404.164	1.00557	0.339424	2.96258	0.00305071	0.0938623
ENSG00000115165.10_7	6068.67	1.52821	0.449347	3.40097	0.000671481	0.0319381
ENSG00000123612.16_6	1357.47	1.05701	0.264471	3.99669	6.42342e-05	0.00495699
ENSG00000115267.8_8	339.709	-1.78928	0.383911	-4.66065	3.15207e-06	0.000414471
ENSG00000073737.17_7	302.463	1.55212	0.503571	3.08224	0.00205451	0.0724993
ENSG00000234350.5_11	980.301	0.842668	0.283047	2.97713	0.00290961	0.0905865
ENSG00000128683.14_8	6748.87	1.08234	0.343494	3.15097	0.0016273	0.0621315
ENSG00000280414.1_5	11.9621	7.58235	2.37482	3.19282	0.00140892	0.0553756
ENSG00000217236.2_6	148.09	1.64634	0.557616	2.95246	0.00315249	0.0958658
ENSG00000213963.6_11	1651.1	0.814439	0.277337	2.93664	0.00331788	0.0989772
ENSG00000115232.14_7	383.779	-4.19824	1.41926	-2.95804	0.00309599	0.0946368
ENSG00000168542.16_6	61.0978	3.11725	0.947627	3.28954	0.00100352	0.0436517
ENSG00000204262.14_8	312.089	2.04711	0.359433	5.69538	1.23098e-08	3.44922e-06
ENSG00000284052.1_2	124.564	2.25274	0.484072	4.65374	3.25963e-06	0.000425824
ENSG00000228509.6_8	1985.98	3.59357	0.489568	7.34028	2.1315e-13	2.09038e-10
ENSG00000229056.2_9	2760.95	1.4219	0.27785	5.11751	3.09592e-07	5.78323e-05
ENSG00000196141.14_8	7448.52	1.04978	0.240774	4.36001	1.30059e-05	0.00133676
ENSG00000116117.18_6	195.206	-2.56514	0.739446	-3.469	0.000522404	0.0260505
ENSG00000144407.9_8	220.774	2.06659	0.500978	4.12512	3.70546e-05	0.00320645
ENSG00000078018.20_9	185.869	3.98079	0.64399	6.18144	6.35175e-10	2.7182e-07
ENSG00000197585.10_10	431.304	3.17292	0.633712	5.00688	5.53202e-07	9.30051e-05
ENSG00000233143.2_7	1272.5	2.42444	0.56239	4.31095	1.62555e-05	0.00161437
ENSG00000231672.8_8	41.1898	3.16976	0.868152	3.65115	0.000261066	0.0156461
ENSG00000163497.3_5	980.955	-1.3508	0.312205	-4.32666	1.51389e-05	0.00150985
ENSG00000231189.1_3	60.1812	3.0213	0.717667	4.20989	2.55496e-05	0.00233086
ENSG00000235610.1_3	114.764	3.31015	0.524959	6.30554	2.87183e-10	1.40821e-07
ENSG00000176720.6_8	802.946	0.935659	0.280722	3.33305	0.000859003	0.0386584
ENSG00000287964.1_1	167.767	3.74418	0.913265	4.09977	4.13557e-05	0.00350279
ENSG00000196639.6_5	156.546	2.29536	0.73771	3.11146	0.00186162	0.0676561
ENSG00000232746.1_8	202.51	2.39077	0.740337	3.22929	0.00124096	0.050829
ENSG00000154764.6_6	117.11	3.12913	0.698471	4.47997	7.46542e-06	0.000828837
ENSG00000131373.15_8	5653.45	-0.858426	0.249309	-3.44322	0.000574836	0.0280704
ENSG00000154822.18_7	3427.39	1.17698	0.294225	4.00027	6.32715e-05	0.00493119
ENSG00000225542.2_9	1089.65	-1.39403	0.303355	-4.59537	4.31979e-06	0.000543716
ENSG00000226320.6_8	586.636	1.43379	0.36998	3.87532	0.000106483	0.0075092
ENSG00000168032.10_6	871.988	1.18697	0.376511	3.15255	0.0016185	0.0619426
ENSG00000144791.10_6	2379.61	-0.851104	0.275638	-3.08776	0.00201669	0.0717021
ENSG00000223552.1_9	1488.31	1.60372	0.392615	4.08472	4.41305e-05	0.00369295
ENSG00000283646.2_8	308.164	1.78052	0.511252	3.48266	0.000496457	0.0251293
ENSG00000286651.2_5	118.853	2.05654	0.546722	3.76159	0.000168839	0.0110082
ENSG00000185909.15_5	10577.4	-1.01073	0.261265	-3.86861	0.00010946	0.00766771
ENSG00000182179.13_7	883.461	-1.62723	0.387658	-4.1976	2.69764e-05	0.00243273
ENSG00000113805.8_4	50.0375	2.47652	0.702202	3.52679	0.000420627	0.0226034
ENSG00000114021.12_5	5029.82	0.744699	0.245948	3.02787	0.00246282	0.0806344
ENSG00000121570.12_9	229.846	3.18191	0.7847	4.05494	5.01461e-05	0.0041076
ENSG00000243276.6_9	60.3023	-1.87173	0.616235	-3.03737	0.00238653	0.0792266
ENSG00000144847.13_9	1381.29	-1.60111	0.318806	-5.02222	5.10777e-07	8.71172e-05
ENSG00000239620.3_8	93.3943	3.04711	0.83602	3.64478	0.000267621	0.0159066
ENSG00000158186.13_6	1357.19	1.61785	0.274433	5.89526	3.74095e-09	1.32873e-06
ENSG00000163710.9_8	179.86	2.96753	0.510153	5.81695	5.99299e-09	1.88033e-06
ENSG00000188582.10_7	128.697	2.30258	0.670432	3.43448	0.000593689	0.0288712
ENSG00000244468.1_6	89.6402	2.93958	0.93736	3.13602	0.00171256	0.0644927
ENSG00000169282.17_7	289.233	1.76826	0.359822	4.91426	8.91182e-07	0.000137998
ENSG00000242017.1_4	15.6732	7.97095	2.39847	3.32334	0.000889458	0.0397252
ENSG00000114200.10_7	35.7055	3.20755	0.846687	3.78835	0.00015165	0.0100546
ENSG00000189058.9_8	153.443	3.06454	0.621408	4.9316	8.15571e-07	0.000127264
ENSG00000271662.1_7	480.432	1.48227	0.349026	4.24687	2.1678e-05	0.0020574
ENSG00000145113.22_7	1152.08	-1.9994	0.329823	-6.06206	1.34388e-09	5.36117e-07
ENSG00000231464.1_5	118.696	1.88412	0.554009	3.40088	0.000671682	0.0319381
ENSG00000075711.21_9	9193.43	-0.918917	0.244622	-3.75647	0.000172324	0.0111123
ENSG00000161267.12_8	49.9174	2.53534	0.751835	3.3722	0.000745714	0.0345509
ENSG00000249626.1_5	1481.08	1.13258	0.332514	3.40609	0.000658997	0.0315902
ENSG00000114473.14_6	1201.18	0.901201	0.282265	3.19275	0.00140927	0.0553756
ENSG00000152953.13_5	140.921	2.06488	0.454249	4.54571	5.47514e-06	0.000654155
ENSG00000163993.7_5	4957.47	-2.11929	0.283792	-7.46777	8.15669e-14	8.72654e-11
ENSG00000205959.4_9	330.439	-1.75122	0.558502	-3.13556	0.00171528	0.0644927
ENSG00000109625.19_6	4534.05	-1.44765	0.459565	-3.15004	0.00163249	0.0621745
ENSG00000109667.12_8	76.3876	1.672	0.559461	2.98859	0.00280267	0.0883461
ENSG00000261121.2_9	303.806	3.38612	0.559639	6.05056	1.44347e-09	5.66248e-07
ENSG00000251410.2_6	198.344	1.98757	0.425424	4.67198	2.98315e-06	0.000398946
ENSG00000248215.6_9	235.148	1.85077	0.523998	3.53203	0.00041239	0.022365
ENSG00000250338.1_6	16.5217	4.58771	1.54229	2.97461	0.00293359	0.0909723
ENSG00000174343.6_5	28.466	3.54149	1.0663	3.32128	0.000896062	0.0399443
ENSG00000128052.10_7	49.2315	2.64717	0.693616	3.81647	0.000135372	0.00920894
ENSG00000150471.16_6	98.4604	-3.7009	0.842165	-4.39451	1.11021e-05	0.00117179
ENSG00000205649.9_5	14.2231	7.83236	2.43461	3.21709	0.00129496	0.0522803
ENSG00000109205.16_4	227.659	2.37012	0.77871	3.04364	0.00233731	0.0784427
ENSG00000163736.4_6	69.7895	-4.8776	0.68507	-7.11985	1.08045e-12	9.0823e-10
ENSG00000124882.4_5	147.469	-4.14515	0.593042	-6.98963	2.75603e-12	2.15147e-09
ENSG00000138759.19_6	707.876	2.00841	0.356096	5.64009	1.6996e-08	4.58844e-06
ENSG00000138675.16_5	693.079	1.00908	0.292431	3.45067	0.000559198	0.0274205
ENSG00000163629.13_6	70.9526	3.58217	1.19523	2.99705	0.00272607	0.0867074
ENSG00000152592.14_7	31.2937	5.51677	1.45045	3.8035	0.000142669	0.00959426
ENSG00000168785.8_7	5456.78	2.64685	0.466637	5.67219	1.40987e-08	3.90401e-06
ENSG00000260641.1_6	102.915	2.7136	0.603452	4.49679	6.89862e-06	0.000780638
ENSG00000246090.7_9	924.181	1.78707	0.287453	6.21694	5.06956e-10	2.27672e-07
ENSG00000249264.1_4	132.043	-3.65202	0.490079	-7.4519	9.20079e-14	9.41561e-11
ENSG00000174607.11_7	77.4123	-2.85581	0.875059	-3.26356	0.0011002	0.0465746
ENSG00000249244.1_7	24.8685	2.96596	0.968355	3.06289	0.00219213	0.0756541
ENSG00000170006.12_7	3861.4	-1.06825	0.297475	-3.59104	0.000329356	0.0186797
ENSG00000197410.14_7	1440.44	1.13415	0.374256	3.0304	0.00244231	0.0806344
ENSG00000154447.15_7	205.619	2.51761	0.537215	4.68641	2.78033e-06	0.000378269
ENSG00000174473.16_5	247.276	1.17082	0.389339	3.00719	0.00263679	0.0847843
ENSG00000205129.8_4	117.677	2.44514	0.590393	4.14155	3.44968e-05	0.00304101
ENSG00000179046.8_5	796.948	4.63995	1.45872	3.18085	0.00146845	0.0569405
ENSG00000184108.8_5	46.178	2.77289	0.755333	3.67109	0.000241523	0.0146513
ENSG00000248370.2_9	1773.3	1.81548	0.570032	3.18488	0.00144812	0.0565247
ENSG00000215246.5_9	359.424	1.56001	0.52294	2.98314	0.00285303	0.0896554
ENSG00000250584.3_9	601.928	1.76314	0.503227	3.50368	0.000458885	0.0240017
ENSG00000249740.3_9	258.623	2.22788	0.426921	5.21849	1.80392e-07	3.50901e-05
ENSG00000251141.6_9	140.357	-1.58936	0.525114	-3.02669	0.00247247	0.0807136
ENSG00000248898.3_8	31.7743	3.03326	0.881818	3.43977	0.0005822	0.0283711
ENSG00000248727.6_8	43.2907	3.24384	1.10204	2.94348	0.00324545	0.0975582
ENSG00000113448.19_10	163.479	2.66855	0.76215	3.50134	0.000462922	0.0241592
ENSG00000145700.10_5	332.122	1.34876	0.337347	3.99815	6.38388e-05	0.00494366
ENSG00000164251.5_6	219.12	1.57474	0.420376	3.74604	0.00017965	0.0115216
ENSG00000171643.14_7	80.3253	3.13304	0.772817	4.05405	5.03376e-05	0.0041076
ENSG00000248323.7_10	646.445	2.07172	0.458225	4.52118	6.1495e-06	0.000716538
ENSG00000184349.13_7	70.174	4.07829	0.909446	4.48437	7.31287e-06	0.000819633
ENSG00000251076.1_6	68.1578	2.34958	0.668854	3.51284	0.000443347	0.023397
ENSG00000172901.20_7	875.661	1.40322	0.332339	4.22226	2.41867e-05	0.00225013
ENSG00000268223.5_6	49.936	3.45685	1.13124	3.05579	0.00224465	0.077015
ENSG00000092421.17_8	753.024	1.37402	0.440572	3.11872	0.00181636	0.0669039
ENSG00000173926.6_6	6434.87	0.874799	0.247859	3.52943	0.000416462	0.0225051
ENSG00000283897.2_8	48.6881	3.01832	0.932261	3.23763	0.00120527	0.0499443
ENSG00000113396.13_6	823.528	-1.37697	0.276908	-4.97264	6.60458e-07	0.000106474
ENSG00000164400.6_5	57.6389	2.8847	0.920196	3.13488	0.00171925	0.0645391
ENSG00000251169.2_7	60.7363	1.90169	0.609475	3.12022	0.00180718	0.0667748
ENSG00000249639.1_6	1262.33	2.07617	0.273717	7.58509	3.32249e-14	4.34453e-11
ENSG00000145832.14_7	46.9998	-2.44294	0.692215	-3.52916	0.000416885	0.0225051
ENSG00000120708.17_8	225.893	1.86931	0.566099	3.30208	0.000959692	0.0422211
ENSG00000120738.8_5	28809	1.53927	0.246767	6.23772	4.43987e-10	2.09003e-07
ENSG00000187678.10_7	9050.11	1.43917	0.294271	4.89061	1.00524e-06	0.000154642
ENSG00000169252.5_2	169.806	5.6359	1.83125	3.07762	0.00208659	0.0731916
ENSG00000055163.20_8	3998.6	-1.53932	0.303819	-5.06656	4.05074e-07	7.27804e-05
ENSG00000170231.16_4	308.541	2.73671	0.449836	6.08379	1.17375e-09	4.84675e-07
ENSG00000135083.16_9	412.003	2.67301	0.414907	6.44243	1.17575e-10	6.43575e-08
ENSG00000229119.3_5	289.5	-1.25819	0.352176	-3.57263	0.000353414	0.0198055
ENSG00000134516.18_8	20010	-0.877807	0.283187	-3.09974	0.00193688	0.0696005
ENSG00000235172.8_8	1364.48	1.62647	0.357794	4.54581	5.47249e-06	0.000654155
ENSG00000253686.2_9	134.622	1.81492	0.530882	3.4187	0.000629218	0.0304731
ENSG00000131459.13_7	261.398	2.50727	0.534079	4.69457	2.67164e-06	0.000365595
ENSG00000263667.3_10	58.7329	4.23957	1.16601	3.63596	0.000276944	0.0163369
ENSG00000286364.1_1	15.1246	7.91873	2.44081	3.2443	0.00117738	0.0490594
ENSG00000170542.6_6	22807.8	1.23457	0.336143	3.67274	0.000239964	0.0145944
ENSG00000137285.10_6	3840.87	-1.19596	0.27212	-4.39496	1.10793e-05	0.00117179
ENSG00000228793.2_9	2629.71	4.09502	0.570379	7.17948	6.99769e-13	6.58818e-10
ENSG00000168994.14_5	890.315	1.68865	0.355245	4.75349	1.99935e-06	0.000281789
ENSG00000270504.1_6	135.54	2.0374	0.489683	4.16064	3.17354e-05	0.0028187
ENSG00000260604.2_8	1010.71	0.985677	0.291204	3.38484	0.000712202	0.0333926
ENSG00000153162.9_5	146.635	1.43856	0.441999	3.25466	0.00113528	0.0479731
ENSG00000205269.6_5	287.226	-1.32422	0.371504	-3.56448	0.000364573	0.0202381
ENSG00000079691.18_8	122.175	1.94732	0.480859	4.04967	5.12908e-05	0.00416287
ENSG00000079689.14_5	197.331	1.85856	0.610521	3.04422	0.00233281	0.0784427
ENSG00000010704.18_6	476.019	1.20187	0.365627	3.28715	0.00101205	0.043788
ENSG00000180596.7_5	2117.07	1.06722	0.333569	3.19941	0.00137711	0.0543844
ENSG00000204540.11_6	64.4579	2.74436	0.756697	3.62676	0.000286998	0.0167619
ENSG00000240053.8_5	1291.83	-0.848495	0.263135	-3.22456	0.00126164	0.0511989
ENSG00000204389.10_6	12911.3	-1.56043	0.308766	-5.05377	4.33171e-07	7.60861e-05
ENSG00000204388.7_7	4956.98	-1.18757	0.282082	-4.21001	2.55363e-05	0.00233086
ENSG00000168477.19_11	4854.12	-0.887246	0.29076	-3.05147	0.00227722	0.0774551
ENSG00000156711.17_5	2033.04	1.86552	0.356738	5.22938	1.70076e-07	3.3359e-05
ENSG00000010030.14_7	302.584	3.16297	0.703723	4.49462	6.96929e-06	0.000784863
ENSG00000124772.12_7	978.851	1.18068	0.302949	3.89728	9.72797e-05	0.00704514
ENSG00000112139.16_8	3045.33	2.80902	0.544278	5.16101	2.45622e-07	4.66227e-05
ENSG00000112164.6_5	939.087	1.78189	0.432603	4.119	3.80526e-05	0.00325689
ENSG00000124731.13_7	76.3898	2.65213	0.819779	3.23517	0.00121569	0.0501996
ENSG00000237686.7_9	16957.2	2.50814	0.425777	5.89074	3.84462e-09	1.32873e-06
ENSG00000181577.16_7	279.22	1.90369	0.395359	4.81509	1.47135e-06	0.000217806
ENSG00000146085.8_6	6315.62	-1.30842	0.264861	-4.94002	7.81141e-07	0.000123394
ENSG00000233470.1_6	214.771	1.3471	0.443258	3.03909	0.00237293	0.0789981
ENSG00000244067.3_6	35.556	3.07065	0.827195	3.71213	0.000205523	0.0129342
ENSG00000225096.3_8	62.8099	2.70578	0.690875	3.91645	8.98607e-05	0.00654815
ENSG00000146250.7_5	34.5218	4.65068	1.23183	3.77542	0.000159739	0.0105316
ENSG00000025039.15_6	2698.81	-1.52219	0.261611	-5.81852	5.93707e-09	1.88033e-06
ENSG00000135299.17_9	437.708	-1.5092	0.380684	-3.96444	7.35686e-05	0.0055146
ENSG00000135341.18_6	13424	-0.787118	0.237154	-3.31902	0.000903344	0.0401928
ENSG00000112367.12_4	3284.22	-0.975301	0.265234	-3.67714	0.000235863	0.0144195
ENSG00000286540.1_1	50.4818	4.18993	1.20201	3.48576	0.000490735	0.0250552
ENSG00000197594.13_6	287.921	2.43313	0.702456	3.46374	0.000532716	0.0263969
ENSG00000227954.7_9	27.0101	4.7126	1.30615	3.608	0.000308567	0.017714
ENSG00000287393.1_3	29.6136	-3.60699	0.948024	-3.80474	0.000141951	0.00957337
ENSG00000135604.10_5	291.703	-2.84843	0.669486	-4.25465	2.09373e-05	0.00199515
ENSG00000120279.6_7	103.35	2.05128	0.609448	3.3658	0.000763207	0.0351782
ENSG00000285797.1_2	69.727	3.95307	1.02667	3.85039	0.000117931	0.00821223
ENSG00000283117.1_9	77.2575	2.5004	0.704129	3.55105	0.000383697	0.02115
ENSG00000146530.14_9	27745.4	-0.945677	0.272199	-3.47421	0.000512354	0.025658
ENSG00000187546.14_6	353.999	1.78596	0.556627	3.20854	0.0013341	0.0531315
ENSG00000164649.20_8	2129.66	1.67451	0.381723	4.38673	1.15069e-05	0.0012091
ENSG00000232949.2_8	333.207	1.57759	0.485284	3.25086	0.00115056	0.0484448
ENSG00000136244.12_8	474.435	1.16814	0.327661	3.5651	0.000363719	0.0202381
ENSG00000222004.7_4	1129.21	1.55118	0.305029	5.08535	3.66939e-07	6.74738e-05
ENSG00000136193.17_7	808.735	0.887575	0.299963	2.95895	0.00308685	0.0944802
ENSG00000078549.15_9	71.9316	3.21704	0.75959	4.23523	2.28319e-05	0.00213894
ENSG00000122641.11_7	190.694	2.20123	0.534371	4.11929	3.80043e-05	0.00325689
ENSG00000164647.9_7	151.34	2.20846	0.72207	3.05851	0.00222437	0.0765425
ENSG00000105825.14_8	1460.91	4.3207	0.396406	10.8997	1.15658e-27	9.07415e-24
ENSG00000127920.6_5	73.7563	3.55328	0.826059	4.30149	1.69654e-05	0.0016569
ENSG00000236453.5_5	51.2856	2.77892	0.740415	3.75319	0.000174595	0.011228
ENSG00000164692.18_5	920.22	6.31211	0.53449	11.8096	3.48204e-32	8.19568e-28
ENSG00000106258.15_7	1479.67	-0.914902	0.288359	-3.17279	0.00150983	0.0583527
ENSG00000227053.1_8	30.8093	3.12918	0.954925	3.27688	0.0010496	0.0451635
ENSG00000106366.9_5	5942.95	2.89739	0.387093	7.485	7.15465e-14	8.019e-11
ENSG00000128536.16_6	85.6595	3.85911	0.729701	5.28862	1.23242e-07	2.54451e-05
ENSG00000228742.11_9	7994.75	0.834908	0.2605	3.20503	0.0013505	0.0536032
ENSG00000106025.9_6	355.081	1.56982	0.386437	4.06229	4.85941e-05	0.00401319
ENSG00000135253.14_7	227.652	1.49455	0.48473	3.08327	0.00204742	0.0724122
ENSG00000128510.12_7	110.125	4.14527	0.823121	5.03604	4.75254e-07	8.22503e-05
ENSG00000266265.3_6	102.791	3.19235	1.01577	3.14279	0.00167348	0.0632244
ENSG00000128567.17_6	2346.84	2.34026	0.410424	5.70205	1.18372e-08	3.397e-06
ENSG00000155530.3_5	194.905	1.78539	0.432604	4.12708	3.67394e-05	0.00319091
ENSG00000189320.9_8	41.8545	2.62179	0.829832	3.15943	0.0015808	0.0606991
ENSG00000105929.16_7	51.5696	2.3494	0.703449	3.33983	0.000838292	0.037944
ENSG00000127366.5_3	382.214	1.39605	0.337247	4.13954	3.47997e-05	0.00305627
ENSG00000211747.3_4	114.645	2.35518	0.633888	3.71545	0.000202844	0.0127999
ENSG00000282499.1_4	20.206	4.88233	1.59373	3.06346	0.00218796	0.0756212
ENSG00000241911.1_4	114.149	3.13058	0.564743	5.54337	2.96702e-08	7.50912e-06
ENSG00000211752.3_4	244.52	2.59593	0.484639	5.35642	8.48865e-08	1.86727e-05
ENSG00000211753.4_4	57.0074	2.34824	0.688428	3.41102	0.000647203	0.0311088
ENSG00000204983.14_5	8183.44	2.30839	0.547942	4.21283	2.52188e-05	0.00231866
ENSG00000250606.4	857.15	2.5105	0.598477	4.19481	2.73102e-05	0.00245343
ENSG00000237254.2_5	113.897	3.6524	0.795903	4.58901	4.45363e-06	0.000551711
ENSG00000106123.12_7	16262.7	2.99606	0.392172	7.63965	2.17815e-14	3.2042e-11
ENSG00000165125.21_10	563.298	2.92115	0.519424	5.62383	1.86768e-08	4.92193e-06
ENSG00000196511.14_7	389.419	-1.50008	0.431028	-3.48024	0.000500962	0.0252487
ENSG00000181444.13_6	1232.84	-1.29899	0.273719	-4.7457	2.07782e-06	0.000291105
ENSG00000154319.16_9	42.1343	2.21289	0.723786	3.05738	0.00223277	0.0767194
ENSG00000104219.13_6	5003.51	-1.1102	0.27625	-4.01884	5.84851e-05	0.00458854
ENSG00000179388.9_6	230.3	2.60191	0.416397	6.24864	4.14045e-10	1.98885e-07
ENSG00000134013.16_7	2133.25	1.78798	0.253458	7.05433	1.73429e-12	1.40758e-09
ENSG00000159167.12_6	538.428	3.77778	0.321723	11.7423	7.73213e-32	9.09956e-28
ENSG00000147459.18_6	154.879	2.31431	0.688447	3.36164	0.000774819	0.035619
ENSG00000172733.11_6	174.891	-1.27916	0.427485	-2.99229	0.00276894	0.0875975
ENSG00000254111.3_8	14.3051	7.83969	2.41628	3.24453	0.00117645	0.0490594
ENSG00000077782.21_8	2246.8	2.57614	0.39286	6.5574	5.47543e-11	3.30449e-08
ENSG00000104368.18_8	452.898	1.90232	0.326756	5.82183	5.82078e-09	1.87676e-06
ENSG00000248347.3_8	41.2223	5.91617	1.32029	4.48095	7.43113e-06	0.000828837
ENSG00000253140.2_9	188.374	1.5716	0.399504	3.93388	8.35838e-05	0.00616712
ENSG00000019549.13_9	70.4748	3.66193	1.12135	3.26564	0.00109218	0.0465146
ENSG00000286471.1_1	383.841	2.15134	0.614905	3.49865	0.00046762	0.0242966
ENSG00000254285.3_4	2251.76	1.39454	0.38197	3.65092	0.000261298	0.0156461
ENSG00000287352.1_3	143.035	-2.36549	0.678156	-3.48812	0.000486428	0.024925
ENSG00000091656.19_10	800.953	-1.58943	0.382172	-4.15894	3.19732e-05	0.00282914
ENSG00000104432.14_7	75.991	-4.09114	0.964571	-4.24141	2.22124e-05	0.00209125
ENSG00000164687.11_5	1526.05	1.20212	0.318761	3.77123	0.000162446	0.0106504
ENSG00000253898.1_5	1642.71	-3.20667	0.581841	-5.51124	3.56308e-08	8.82781e-06
ENSG00000133742.14_8	7262.99	2.3117	0.440872	5.24348	1.57576e-07	3.11684e-05
ENSG00000164879.7_6	633.109	2.91523	0.540513	5.39345	6.91166e-08	1.57942e-05
ENSG00000253549.6_9	31.6308	3.50081	0.994261	3.52102	0.000429896	0.0229965
ENSG00000104267.10_5	2548.48	4.03247	1.09413	3.68553	0.000228224	0.0139888
ENSG00000079102.16_10	391.334	4.39463	0.639807	6.86868	6.47996e-12	4.62178e-09
ENSG00000169439.12_6	1011.15	2.21513	0.550644	4.02279	5.75121e-05	0.0045273
ENSG00000253669.4_8	322.234	1.43961	0.383039	3.7584	0.000171003	0.0111123
ENSG00000164935.6_3	40.2702	3.3853	1.11236	3.04335	0.00233958	0.0784427
ENSG00000251003.9_8	691.134	3.86203	1.31295	2.94148	0.00326644	0.0979391
ENSG00000255099.1_5	35.564	9.15312	2.32959	3.92906	8.52768e-05	0.0062638
ENSG00000064313.12_7	6027.71	-0.842726	0.240411	-3.50536	0.000455996	0.0239037
ENSG00000204949.9_9	1384.86	-0.815999	0.261797	-3.11692	0.00182751	0.0670002
ENSG00000156804.7_6	1611.02	0.954704	0.269638	3.54068	0.000399091	0.0219398
ENSG00000214814.7_4	120.721	2.26958	0.668224	3.39643	0.000682713	0.0323972
ENSG00000164961.16_7	5441.88	-1.24332	0.263753	-4.71395	2.42955e-06	0.000334412
ENSG00000104419.17_11	13970.8	1.89752	0.477208	3.97629	6.99989e-05	0.00534924
ENSG00000259820.1_8	2576.3	0.933028	0.310552	3.00442	0.00266088	0.0848821
ENSG00000253595.6_9	202.44	-3.08023	0.495599	-6.21518	5.12667e-10	2.27672e-07
ENSG00000104499.7_6	55.5809	3.50684	0.720343	4.86829	1.1257e-06	0.000169844
ENSG00000160882.13_6	47.3595	3.16519	0.766029	4.13195	3.59696e-05	0.00314728
ENSG00000277494.2_6	61.6826	4.15905	0.764532	5.43999	5.32834e-08	1.25413e-05
ENSG00000261150.3_5	1291.08	-1.15929	0.379734	-3.05289	0.00226652	0.0774268
ENSG00000107249.23_8	381.409	2.22853	0.530589	4.20011	2.66786e-05	0.00241513
ENSG00000171843.17_6	96.6805	-3.38171	0.545459	-6.19976	5.65508e-10	2.46488e-07
ENSG00000224303.1	298.407	1.27795	0.409312	3.1222	0.00179507	0.0665364
ENSG00000185775.9	191.04	3.64075	0.567979	6.41001	1.4551e-10	7.61083e-08
ENSG00000154529.10	106.99	2.15364	0.623764	3.45265	0.000555105	0.0273337
ENSG00000238113.7_7	433.737	1.21397	0.312863	3.8802	0.000104369	0.00742849
ENSG00000234665.9_11	58.0472	3.37206	0.905249	3.72501	0.00019531	0.012458
ENSG00000119139.21_10	681.154	-1.19628	0.296694	-4.03202	5.52999e-05	0.00439728
ENSG00000278910.4_7	250.65	2.08044	0.411987	5.04977	4.42347e-07	7.71224e-05
ENSG00000165105.10_6	113.092	5.78724	1.02156	5.6651	1.46935e-08	4.0214e-06
ENSG00000172159.16_6	465.07	0.964784	0.324504	2.9731	0.00294805	0.0910036
ENSG00000213694.6_7	550.235	3.79667	1.21725	3.11907	0.00181423	0.0669039
ENSG00000119326.15_7	8070.58	-1.51814	0.253566	-5.98717	2.1353e-09	7.97754e-07
ENSG00000157654.19_8	214.73	2.52398	0.525139	4.80631	1.53744e-06	0.000226167
ENSG00000165124.18_6	974.644	1.82134	0.505043	3.6063	0.000310596	0.0177871
ENSG00000228714.4_9	41.6425	2.13372	0.725013	2.94301	0.00325034	0.0975808
ENSG00000056558.11_6	372.162	1.67073	0.334431	4.99573	5.86129e-07	9.64735e-05
ENSG00000106991.14_4	626.69	1.19371	0.406089	2.93952	0.00328716	0.0984284
ENSG00000204055.5_9	24.3945	3.54132	1.07675	3.28891	0.00100575	0.0436517
ENSG00000148344.11_6	1709.65	2.17885	0.371585	5.86366	4.52786e-09	1.50102e-06
ENSG00000130707.18_5	9284.01	-1.61123	0.47859	-3.36661	0.000760978	0.0351782
ENSG00000123454.12_6	42.6257	3.00638	0.976992	3.07718	0.00208968	0.0731916
ENSG00000225756.1_8	103.388	4.42125	0.693104	6.37892	1.78345e-10	9.12546e-08
ENSG00000123453.18_8	295.144	2.25847	0.423535	5.33242	9.69103e-08	2.05692e-05
ENSG00000122136.13_4	24.5631	4.57111	1.31847	3.46697	0.000526363	0.0261371
ENSG00000122133.17_7	9504.16	4.69514	1.21436	3.86635	0.000110476	0.00771596
ENSG00000237339.5_5	79.4807	3.50761	0.912542	3.84378	0.000121152	0.00838695
ENSG00000279141.3_6	231.5	1.52191	0.498952	3.05021	0.00228681	0.0776091
ENSG00000199161.1	67.2677	2.0982	0.697508	3.00814	0.00262848	0.0846327
ENSG00000197355.11_5	3063.34	-1.30199	0.418733	-3.10936	0.00187491	0.0678918
ENSG00000261456.6_5	59.3939	2.3145	0.630934	3.66837	0.000244099	0.0147696
ENSG00000225778.5_9	4496.23	1.03693	0.278838	3.71876	0.000200202	0.0126671
ENSG00000151474.23_9	1660.94	1.02152	0.292854	3.48815	0.000486381	0.024925
ENSG00000233968.7_9	486.524	-4.42231	0.620181	-7.13068	9.9875e-13	8.70651e-10
ENSG00000078114.19_6	2476.64	-2.07787	0.346855	-5.9906	2.09065e-09	7.94313e-07
ENSG00000151023.17_6	569.612	1.88494	0.359484	5.24347	1.57583e-07	3.11684e-05
ENSG00000230445.4_7	279.999	1.76608	0.404921	4.36153	1.29157e-05	0.00133332
ENSG00000234814.8_7	10.0519	7.33079	2.44006	3.00435	0.00266147	0.0848821
ENSG00000286694.1_4	13.4444	7.74903	2.45268	3.15942	0.00158085	0.0606991
ENSG00000099250.18_10	326.851	2.83524	0.354771	7.99176	1.33027e-15	3.13106e-12
ENSG00000215146.5_8	1902.17	1.03995	0.287435	3.61804	0.000296838	0.0172086
ENSG00000182632.15_6	394.562	1.57091	0.492958	3.18669	0.0014391	0.0562659
ENSG00000185904.12_7	1271.41	2.25504	0.378514	5.9576	2.55964e-09	9.26865e-07
ENSG00000233643.2_10	75.1105	2.06575	0.66313	3.11515	0.00183854	0.0671952
ENSG00000150347.16_6	1603.6	2.68705	0.337968	7.9506	1.85607e-15	3.60722e-12
ENSG00000182010.11_6	1059.41	3.10699	0.330405	9.40359	5.27313e-21	3.10284e-17
ENSG00000138311.18_7	58.1381	4.0712	0.74249	5.48317	4.17773e-08	1.01372e-05
ENSG00000122877.16_8	332.706	2.46107	0.468941	5.24813	1.53649e-07	3.09097e-05
ENSG00000224714.3_10	13.6134	7.7716	2.54806	3.05001	0.00228834	0.0776091
ENSG00000099282.10_6	366.209	1.60905	0.476856	3.37429	0.000740055	0.0343564
ENSG00000107719.9_5	259.506	2.06876	0.408502	5.06427	4.09972e-07	7.31023e-05
ENSG00000156113.24_9	500.398	3.41611	0.686249	4.97795	6.42627e-07	0.000104335
ENSG00000213514.2_5	78.9543	3.73933	0.693639	5.39089	7.01102e-08	1.58603e-05
ENSG00000151208.17_7	13138.6	-0.846956	0.271671	-3.11758	0.00182343	0.066955
ENSG00000133665.13_7	265.703	2.0413	0.648232	3.14902	0.00163818	0.0622906
ENSG00000173269.14_9	90.1032	2.58194	0.694076	3.71996	0.000199252	0.012641
ENSG00000173267.14_5	932.828	1.43956	0.463784	3.10396	0.00190952	0.0688277
ENSG00000138138.13_4	6560.36	-0.880492	0.264504	-3.32885	0.000872063	0.0390282
ENSG00000138119.17_7	98.7118	2.51889	0.798386	3.15498	0.00160509	0.0615295
ENSG00000095637.22_10	10626.2	0.868026	0.236265	3.67395	0.000238831	0.0145631
ENSG00000236552.2_2	3214.15	-0.784544	0.251788	-3.1159	0.00183387	0.0671288
ENSG00000273143.2_9	153.815	1.53928	0.476634	3.22948	0.00124014	0.050829
ENSG00000138166.6_5	2367.1	1.46759	0.440875	3.32881	0.000872193	0.0390282
ENSG00000197142.10_2	237.137	1.12519	0.381012	2.95315	0.00314547	0.095776
ENSG00000225936.1_8	152.136	-2.20521	0.535515	-4.11793	3.82291e-05	0.00326014
ENSG00000165646.14_8	400.52	-2.37966	0.590461	-4.03017	5.57362e-05	0.00441705
ENSG00000203805.11_5	609.832	4.11247	0.535554	7.6789	1.60454e-14	2.51774e-11
ENSG00000177234.7_7	20.6345	3.89612	1.1916	3.26964	0.00107683	0.0459988
ENSG00000274461.2_8	39.691	5.86323	1.23869	4.73342	2.20764e-06	0.000307463
ENSG00000107672.15_6	1969.88	-0.981402	0.265162	-3.70114	0.000214631	0.0133622
ENSG00000138152.10_6	32.7134	3.97467	1.0954	3.62849	0.000285079	0.0166913
ENSG00000107679.14_5	1375.57	1.53379	0.496525	3.08905	0.002008	0.0715012
ENSG00000187908.20_8	79.0628	3.05217	0.82511	3.69911	0.000216354	0.0133967
ENSG00000185101.13_6	946.614	-1.77327	0.569944	-3.1113	0.00186265	0.0676561
ENSG00000184545.11_6	737.975	-2.12669	0.355958	-5.97456	2.30708e-09	8.48463e-07
ENSG00000130600.19_8	3314	1.69164	0.308865	5.47698	4.32652e-08	1.02862e-05
ENSG00000254592.1_6	65.0442	2.08069	0.648439	3.20877	0.00133306	0.0531315
ENSG00000251364.7_9	514.248	1.4621	0.319152	4.58119	4.62343e-06	0.000569747
ENSG00000175352.11_7	10220.3	0.879848	0.297345	2.95902	0.00308623	0.0944802
ENSG00000148926.10_6	663.171	2.26257	0.358673	6.30817	2.82354e-10	1.40821e-07
ENSG00000254401.2_10	354.833	2.28443	0.655531	3.48485	0.000492421	0.0250868
ENSG00000254946.2_9	206.285	1.73579	0.541773	3.20391	0.00135575	0.0537209
ENSG00000165970.12_4	81.1113	3.09208	0.599052	5.16162	2.44826e-07	4.66227e-05
ENSG00000166016.6_7	830.336	1.9588	0.29385	6.66599	2.62895e-11	1.71882e-08
ENSG00000135373.13_6	127.091	1.43943	0.468944	3.06952	0.00214403	0.0745988
ENSG00000255521.2_9	75.1596	3.66579	0.731366	5.01225	5.37971e-07	9.10952e-05
ENSG00000026508.20_10	31468.6	2.49468	0.357111	6.98574	2.83364e-12	2.15147e-09
ENSG00000254654.2_5	50.3053	3.58648	1.0148	3.53419	0.000409024	0.0222852
ENSG00000287538.1_3	109.366	2.67408	0.766666	3.48793	0.000486772	0.024925
ENSG00000166961.15_7	104.967	1.94343	0.60591	3.20745	0.00133917	0.0532435
ENSG00000243742.5_2	689.799	2.61401	0.493719	5.29453	1.19323e-07	2.4854e-05
ENSG00000167995.17_5	1087.83	-1.54147	0.365572	-4.2166	2.48015e-05	0.00228923
ENSG00000124942.14_10	58854.8	-0.804178	0.267565	-3.00554	0.00265113	0.0848821
ENSG00000174791.11_8	373.123	1.65981	0.37353	4.44358	8.84737e-06	0.00096856
ENSG00000173227.14_6	62.8922	2.02803	0.688928	2.94374	0.0032427	0.0975582
ENSG00000131620.17_7	269.149	1.86974	0.400748	4.66563	3.07679e-06	0.000406845
ENSG00000214530.9_9	2941.19	-0.859598	0.268948	-3.19615	0.00139273	0.0549091
ENSG00000255395.1_9	5569.44	1.84715	0.516756	3.57451	0.000350882	0.0197577
ENSG00000062282.15_9	1354.62	1.43995	0.264962	5.43454	5.49371e-08	1.28025e-05
ENSG00000255363.3_11	131.241	3.07991	0.779339	3.95195	7.75153e-05	0.00579199
ENSG00000198488.10_8	156.869	4.1262	0.679001	6.07687	1.2255e-09	4.97322e-07
ENSG00000149972.11_7	201.911	2.50651	0.713229	3.51432	0.000440887	0.023372
ENSG00000023445.16_6	185.369	1.52677	0.499856	3.05443	0.0022549	0.0772515
ENSG00000137710.17_8	10460.3	-1.20201	0.261694	-4.59319	4.36518e-06	0.000546507
ENSG00000149295.14_7	220.714	2.41278	0.676462	3.56677	0.000361409	0.0201576
ENSG00000160593.19_11	147.338	2.49076	0.818815	3.04191	0.00235083	0.0787076
ENSG00000160588.10_6	2270.57	1.79334	0.422394	4.24565	2.1796e-05	0.00206029
ENSG00000149573.9_6	158.351	3.6185	0.64175	5.63849	1.71552e-08	4.58844e-06
ENSG00000167286.10_4	10905.8	1.3527	0.380263	3.55727	0.000374733	0.0207044
ENSG00000160654.11_5	441.207	2.60302	0.64494	4.03607	5.4355e-05	0.00435154
ENSG00000255121.2_10	459.284	0.926823	0.311764	2.97283	0.00295066	0.0910036
ENSG00000137699.17_7	450.889	1.70042	0.45951	3.70052	0.000215162	0.0133622
ENSG00000200879.1	50.0931	-2.25392	0.66746	-3.37686	0.000733178	0.0341043
ENSG00000255225.1_4	34.2869	4.6404	1.02464	4.52883	5.93108e-06	0.000697999
ENSG00000149418.11_5	83.2277	2.017	0.560685	3.59739	0.000321424	0.0183181
ENSG00000204241.8_9	56.0475	2.8427	0.807911	3.51858	0.000433856	0.0231557
ENSG00000255545.8_8	402.111	1.78299	0.593389	3.00475	0.00265801	0.0848821
ENSG00000120645.12_5	274.23	1.60228	0.394177	4.06487	4.80588e-05	0.00398296
ENSG00000011105.14_7	1139.99	1.09984	0.373231	2.9468	0.0032108	0.0970123
ENSG00000118972.3_7	763.99	5.21754	1.67326	3.1182	0.0018196	0.0669188
ENSG00000111254.8_11	405.428	1.22296	0.378807	3.22845	0.00124463	0.0508593
ENSG00000010295.19_7	84.8975	2.49127	0.604436	4.12165	3.76176e-05	0.00324324
ENSG00000111644.8_7	8106.52	0.716882	0.243089	2.94906	0.00318743	0.0965541
ENSG00000215009.5_4	44.4314	2.11941	0.711694	2.97798	0.00290158	0.0904562
ENSG00000184344.4_6	15.1702	4.45985	1.49026	2.99266	0.00276557	0.0875975
ENSG00000173262.11_11	3449.4	0.829155	0.25331	3.27328	0.00106306	0.0455725
ENSG00000059804.16_7	103151	0.852332	0.265213	3.21376	0.0013101	0.0526939
ENSG00000175899.15_7	145.968	2.98934	0.559965	5.33844	9.37474e-08	2.02434e-05
ENSG00000245648.2_8	408.485	-1.09708	0.314191	-3.49176	0.000479844	0.0248026
ENSG00000134531.10_7	273.565	2.68755	0.495666	5.4221	5.89021e-08	1.3592e-05
ENSG00000151491.14_11	127.809	1.79585	0.462883	3.8797	0.000104586	0.00742849
ENSG00000111728.10_6	40.8506	3.54806	1.09337	3.24507	0.00117424	0.0490594
ENSG00000134532.19_8	2161.75	-1.28736	0.429302	-2.99873	0.00271109	0.0863476
ENSG00000110841.14_10	12716.9	1.5257	0.466177	3.27279	0.00106491	0.0455725
ENSG00000134297.6_7	798.655	0.836891	0.281545	2.97249	0.00295394	0.0910036
ENSG00000135472.9_8	188.073	-2.03978	0.4817	-4.23455	2.29007e-05	0.00213894
ENSG00000110881.12_7	2025.74	1.2333	0.305556	4.03625	5.43115e-05	0.00435154
ENSG00000185640.6_8	789.326	4.21619	0.603972	6.98077	2.93561e-12	2.15923e-09
ENSG00000170421.12_9	84979.6	1.14452	0.291328	3.92864	8.54263e-05	0.0062638
ENSG00000111077.18_4	995.68	1.50939	0.451909	3.34003	0.000837699	0.037944
ENSG00000135426.16_9	2487.02	-1.66245	0.497355	-3.34258	0.000830037	0.0377154
ENSG00000065361.16_6	4466.82	-0.974034	0.329013	-2.96047	0.00307166	0.0943834
ENSG00000166886.13_7	3904.71	0.874992	0.253472	3.45203	0.000556393	0.0273399
ENSG00000139269.3_5	5921.51	-1.2381	0.411152	-3.01129	0.00260136	0.0839893
ENSG00000257698.2_10	4423.17	-1.26453	0.410091	-3.08353	0.00204563	0.0724122
ENSG00000118596.12_7	26.4306	8.72489	2.25519	3.8688	0.000109373	0.00766771
ENSG00000139239.7_4	3052.74	-0.752805	0.252577	-2.9805	0.00287777	0.090057
ENSG00000166148.4_5	224.067	3.29658	0.601811	5.47777	4.30717e-08	1.02862e-05
ENSG00000177990.12_7	204.044	2.08984	0.686359	3.04482	0.00232816	0.0784427
ENSG00000255583.2_8	304.902	2.7297	0.66837	4.08411	4.42457e-05	0.00369295
ENSG00000213344.2_4	73.4557	2.59376	0.602256	4.30673	1.65687e-05	0.00163585
ENSG00000127329.15_8	2185.68	-0.85508	0.256456	-3.33422	0.000855397	0.0385699
ENSG00000258123.1_6	21.9052	-5.56415	1.35722	-4.09968	4.13721e-05	0.00350279
ENSG00000139289.13_6	4395.25	1.40998	0.368067	3.83078	0.000127736	0.008791
ENSG00000257242.8_9	125.203	-1.71715	0.530726	-3.23548	0.00121439	0.0501996
ENSG00000136048.14_6	1738.35	-1.22157	0.393976	-3.10061	0.00193122	0.0695034
ENSG00000213442.5_4	2080.46	-1.06247	0.251953	-4.21693	2.47652e-05	0.00228923
ENSG00000136052.9_8	465.378	1.38785	0.363648	3.81647	0.000135374	0.00920894
ENSG00000120832.10_9	3125.42	-0.853509	0.27554	-3.09759	0.00195101	0.0700015
ENSG00000257951.2_8	109.555	1.97067	0.590962	3.33469	0.000853955	0.0385699
ENSG00000174600.14_7	366.616	1.93474	0.599681	3.22628	0.00125412	0.0510619
ENSG00000135116.9_9	305.905	1.45108	0.418535	3.46704	0.000526226	0.0261371
ENSG00000139767.10_7	13.6117	7.76866	2.55718	3.03798	0.00238171	0.0791784
ENSG00000248636.7_9	55.2024	3.49604	0.772555	4.52529	6.03123e-06	0.000706254
ENSG00000224982.4_5	793.349	4.66489	0.507944	9.18387	4.15887e-20	1.63146e-16
ENSG00000252886.1	9.94798	7.31782	2.44869	2.98846	0.00280386	0.0883461
ENSG00000256008.3_9	99.7203	2.04305	0.668974	3.054	0.00225811	0.0772515
ENSG00000089041.17_6	192.843	-2.28777	0.452619	-5.05453	4.31461e-07	7.60861e-05
ENSG00000249196.6_6	7975.68	-1.66105	0.436323	-3.80693	0.0001407	0.00951625
ENSG00000279455.1_5	323.128	2.11687	0.503759	4.20216	2.64386e-05	0.00240264
ENSG00000226057.7_7	35.1489	-2.72787	0.788842	-3.45807	0.000544062	0.0269025
ENSG00000276476.3_6	647.626	2.0861	0.379422	5.4981	3.83911e-08	9.41263e-06
ENSG00000132964.12_6	4025.63	-0.996992	0.251125	-3.9701	7.18422e-05	0.00545468
ENSG00000102755.12_6	7734.18	3.96673	0.521744	7.60283	2.89721e-14	4.01127e-11
ENSG00000279393.1_5	45.8556	6.07031	1.27604	4.75714	1.9636e-06	0.000278793
ENSG00000132938.21_7	149.313	1.84625	0.550341	3.35473	0.000794423	0.036449
ENSG00000235097.1_7	63.8971	4.20867	1.06736	3.94306	8.04482e-05	0.00597322
ENSG00000276968.1_6	146.878	4.34195	0.555266	7.81958	5.29996e-15	8.91036e-12
ENSG00000288015.1_3	15.767	7.98164	2.48562	3.21112	0.00132217	0.0529746
ENSG00000136111.14_10	1382.82	-1.341	0.44368	-3.02244	0.00250744	0.0815161
ENSG00000260094.1_5	813.228	3.17497	0.372076	8.53312	1.42454e-17	4.19117e-14
ENSG00000215417.13_6	2315.61	1.16285	0.390719	2.97619	0.00291858	0.0907306
ENSG00000134873.10_5	29.2549	3.58295	0.969742	3.69475	0.000220104	0.0135618
ENSG00000102580.15_6	6193.71	-0.872065	0.260105	-3.35274	0.000800153	0.0366405
ENSG00000134900.12_8	11127.3	-0.825832	0.246512	-3.35007	0.000807907	0.0368873
ENSG00000041515.16_5	3147.97	-1.77343	0.370582	-4.78553	1.70533e-06	0.000247767
ENSG00000129484.13_4	5693.03	-0.8935	0.259491	-3.44328	0.000574702	0.0280704
ENSG00000277734.8_7	83.6689	3.58403	0.840676	4.26327	2.01458e-05	0.00192753
ENSG00000092068.20_8	42224.4	0.958188	0.253353	3.78203	0.000155557	0.0102847
ENSG00000248975.2_9	156.18	3.18076	0.819462	3.88152	0.000103804	0.00742625
ENSG00000258655.2_8	302.29	1.09944	0.361548	3.04092	0.00235856	0.07875
ENSG00000151320.11_7	305.326	1.42066	0.347621	4.08679	4.37376e-05	0.00367662
ENSG00000213741.11_8	52552.9	-0.755594	0.248262	-3.04354	0.00233814	0.0784427
ENSG00000126777.18_8	16706.3	-0.786342	0.241955	-3.24995	0.00115426	0.048514
ENSG00000139970.17_8	35.7014	4.69902	1.18324	3.97132	7.14758e-05	0.00544442
ENSG00000274330.1_5	97.4046	1.5689	0.519771	3.01844	0.00254079	0.0823728
ENSG00000269927.1_6	32.0549	2.47895	0.841547	2.9457	0.0032222	0.0972319
ENSG00000119655.11_7	10443.5	-0.872547	0.235918	-3.69853	0.000216856	0.0133967
ENSG00000258602.1_6	101.485	1.5989	0.492843	3.24424	0.00117766	0.0490594
ENSG00000119714.11_8	5384.52	-1.0489	0.348988	-3.00555	0.00265105	0.0848821
ENSG00000133962.8_11	58.0556	-3.42113	1.11499	-3.0683	0.00215279	0.0746249
ENSG00000165929.13_7	583.322	-1.55108	0.511059	-3.03503	0.00240513	0.0796197
ENSG00000100600.15_7	4472.55	-1.56237	0.299493	-5.21673	1.82107e-07	3.51333e-05
ENSG00000197249.14_8	59.2951	3.40426	1.10629	3.07718	0.00208967	0.0731916
ENSG00000156381.9_8	5042.48	-1.08858	0.287289	-3.78916	0.000151156	0.0100501
ENSG00000183828.15_7	677.237	-1.09137	0.313308	-3.48339	0.000495113	0.0251153
ENSG00000137801.11_6	949.583	3.75042	1.16262	3.22583	0.0012561	0.0510619
ENSG00000137815.14_4	12783.8	-1.16768	0.332007	-3.51703	0.000436411	0.0232069
ENSG00000159337.7_6	51.0043	3.08931	0.803258	3.84597	0.000120075	0.0083369
ENSG00000128881.17_10	3963.18	-0.831853	0.252315	-3.29688	0.00097765	0.0428382
ENSG00000104055.16_8	104.646	1.56091	0.51338	3.04046	0.00236213	0.07875
ENSG00000237289.10_4	91.8815	2.50788	0.645702	3.88396	0.000102769	0.00737462
ENSG00000223572.10_4	73.0335	2.11941	0.692829	3.05906	0.00222031	0.0765146
ENSG00000259520.6_9	164.011	1.86009	0.42019	4.42678	9.56513e-06	0.00103749
ENSG00000171766.17_7	195.495	2.5029	0.534865	4.6795	2.8758e-06	0.00038901
ENSG00000166415.15_7	217.187	-4.16635	1.38019	-3.01868	0.00253875	0.0823728
ENSG00000171016.12_7	64.3325	2.06457	0.64306	3.21053	0.0013249	0.0529746
ENSG00000166035.11_6	721.27	-1.66425	0.55303	-3.00933	0.00261821	0.0844177
ENSG00000166104.15_8	678.363	2.42351	0.458761	5.28274	1.27265e-07	2.58227e-05
ENSG00000260062.3_6	152.835	2.36788	0.599309	3.95103	7.78164e-05	0.00579609
ENSG00000140416.23_10	5912.19	-1.32619	0.328732	-4.03426	5.47744e-05	0.00437025
ENSG00000175318.12_9	150.97	1.96571	0.602069	3.26493	0.0010949	0.0465175
ENSG00000178718.7_4	2128.87	1.21031	0.387115	3.12649	0.00176906	0.0657793
ENSG00000117971.12_7	23.8379	3.27771	1.04733	3.1296	0.00175046	0.0653977
ENSG00000140538.16_6	92.4347	2.23583	0.709627	3.15071	0.00162872	0.0621315
ENSG00000140527.15_7	42.8479	-9.49665	1.45702	-6.51784	7.13258e-11	4.19699e-08
ENSG00000196547.15_9	38823.2	-1.04648	0.315695	-3.31484	0.000916971	0.0406455
ENSG00000185518.11_4	69.249	3.30321	0.963284	3.42911	0.000605559	0.0293877
ENSG00000242173.10_7	141.744	-2.33818	0.490328	-4.76862	1.85496e-06	0.00026622
ENSG00000005001.10_6	81.7307	2.54617	0.854025	2.98138	0.00286955	0.0899341
ENSG00000183454.18_5	60.0117	3.08958	0.700088	4.41314	1.01884e-05	0.00109902
ENSG00000280206.1_7	747.522	-0.870832	0.281717	-3.09116	0.00199377	0.0712101
ENSG00000286712.1_1	137.838	3.15355	0.84724	3.72214	0.000197539	0.0125662
ENSG00000246465.1_8	53.4903	2.77351	0.861691	3.21868	0.0012878	0.0520806
ENSG00000156886.12_6	35.1707	2.5291	0.855981	2.95463	0.00313046	0.0955664
ENSG00000260757.1_7	209.148	1.81553	0.417886	4.34455	1.39559e-05	0.0014171
ENSG00000280180.1_5	159.734	-3.23854	0.800675	-4.04477	5.23756e-05	0.0042363
ENSG00000277639.2_9	23.9541	3.28657	1.1182	2.93915	0.00329112	0.0984284
ENSG00000228695.10_4	32.5637	2.59964	0.885187	2.93682	0.00331594	0.0989772
ENSG00000087258.16_7	340.852	-2.21716	0.638356	-3.47323	0.000514228	0.0256972
ENSG00000102891.4_5	54.9441	5.32633	1.14775	4.64068	3.47268e-06	0.000449101
ENSG00000125148.7_5	1649.95	-2.13698	0.26908	-7.94182	1.99235e-15	3.60722e-12
ENSG00000169715.15_6	44.9116	-2.80497	0.937336	-2.99249	0.00276714	0.0875975
ENSG00000125144.14_8	93.6201	-3.18376	0.707071	-4.50274	6.70833e-06	0.000762772
ENSG00000187193.9_6	266.953	-3.03451	0.523661	-5.7948	6.84039e-09	2.06413e-06
ENSG00000159618.16_5	37.395	-2.63191	0.775826	-3.3924	0.000692834	0.0326281
ENSG00000150394.14_7	64.8488	-3.43845	0.986952	-3.48391	0.000494142	0.0251153
ENSG00000159713.11_6	248.017	1.9706	0.459206	4.29132	1.77612e-05	0.00172746
ENSG00000159753.14_8	780.321	-1.26817	0.375355	-3.37858	0.000728607	0.0339588
ENSG00000172137.19_8	355.594	2.63649	0.54002	4.88221	1.04904e-06	0.000159299
ENSG00000261390.6_8	126.982	-2.85587	0.808378	-3.53284	0.00041112	0.0223477
ENSG00000166473.17_8	312.751	2.01318	0.507564	3.96636	7.29798e-05	0.00549215
ENSG00000197417.9_7	509.762	-1.08509	0.335967	-3.22976	0.00123896	0.050829
ENSG00000284837.1_3	297.091	2.07164	0.634411	3.26546	0.00109286	0.0465146
ENSG00000179314.14_8	105.678	2.2295	0.62055	3.59278	0.000327169	0.0186004
ENSG00000108839.12_6	677.289	-1.14544	0.365596	-3.13307	0.00172986	0.0648341
ENSG00000154898.15_7	81.4226	-2.66019	0.802116	-3.31646	0.000911656	0.0404861
ENSG00000189423.13_6	181.586	-3.01081	0.798104	-3.77246	0.000161648	0.0106277
ENSG00000266795.2	1031.66	1.13139	0.324392	3.48774	0.000487127	0.024925
ENSG00000266885.2_7	526.702	1.04988	0.308473	3.40346	0.000665388	0.0318318
ENSG00000198242.14_5	57032.8	-0.739186	0.249804	-2.95906	0.0030858	0.0944802
ENSG00000264066.6_10	167.289	1.27621	0.41586	3.06885	0.00214887	0.0745988
ENSG00000141314.13_7	95.7553	1.95588	0.541407	3.61259	0.000303151	0.0174513
ENSG00000279668.3_10	238.438	1.7853	0.385567	4.63032	3.65096e-06	0.000469577
ENSG00000108691.9_5	350.254	4.12662	0.550706	7.49332	6.71507e-14	8.019e-11
ENSG00000005156.12_10	5663.4	-1.01058	0.254652	-3.96849	7.23292e-05	0.005474
ENSG00000172716.16_7	188.101	2.16644	0.68073	3.18252	0.00145997	0.0567989
ENSG00000126353.3_7	1306.49	2.00862	0.281011	7.14783	8.81625e-13	7.98108e-10
ENSG00000171346.16_8	189.501	1.59147	0.437924	3.63411	0.000278941	0.0163727
ENSG00000108828.16_7	39302.3	-0.948729	0.306696	-3.09338	0.00197888	0.0708931
ENSG00000184922.14_8	3809.62	-0.822793	0.268382	-3.06576	0.00217119	0.075152
ENSG00000259207.9_6	7320.17	1.73431	0.402914	4.30441	1.67434e-05	0.00164204
ENSG00000246640.1_8	28.0813	4.01806	1.18864	3.38038	0.000723847	0.0338039
ENSG00000005884.18_5	942.955	2.56065	0.585077	4.3766	1.20546e-05	0.00126102
ENSG00000249406.3_9	830.491	1.44539	0.366687	3.94176	8.08844e-05	0.00598672
ENSG00000251179.1_8	102.45	1.82315	0.501649	3.63432	0.000278718	0.0163727
ENSG00000240280.7_5	4234.75	0.797398	0.258321	3.08685	0.00202293	0.0718155
ENSG00000227517.7_7	21.9785	6.00798	1.98353	3.02894	0.00245415	0.0806344
ENSG00000172782.12_8	429.662	-1.50877	0.495702	-3.04371	0.00233678	0.0784427
ENSG00000261335.1_6	100.775	1.83843	0.508584	3.61481	0.000300568	0.017382
ENSG00000267432.6_9	131.686	1.45789	0.473693	3.0777	0.00208602	0.0731916
ENSG00000267123.7_9	201.38	2.44146	0.488467	4.99822	5.78628e-07	9.59096e-05
ENSG00000035862.12_7	162.05	2.23061	0.713793	3.12502	0.00177796	0.066006
ENSG00000266835.6_7	249.748	2.10376	0.595078	3.53527	0.000407365	0.0222852
ENSG00000168454.12_8	816.878	1.39446	0.367109	3.79848	0.000145585	0.00976247
ENSG00000267704.1_4	23.1127	3.03325	1.00633	3.01415	0.00257696	0.0833159
ENSG00000266010.2_8	85.6058	3.01387	0.662742	4.54757	5.42677e-06	0.000654155
ENSG00000141448.11_6	62.1002	4.49542	0.788666	5.70002	1.19791e-08	3.397e-06
ENSG00000118276.11_5	401.575	1.68787	0.329919	5.11602	3.1205e-07	5.78325e-05
ENSG00000259985.1_6	99.7243	1.76134	0.545456	3.22912	0.00124173	0.050829
ENSG00000134759.14_5	23290.4	-1.19877	0.23597	-5.08018	3.77087e-07	6.82731e-05
ENSG00000141469.18_8	132.788	2.04204	0.672742	3.0354	0.00240218	0.0796197
ENSG00000267761.3_9	37.3323	2.71026	0.833109	3.25318	0.00114119	0.0481367
ENSG00000101670.12_8	2917.41	1.18777	0.287549	4.13067	3.6171e-05	0.00315317
ENSG00000267013.6_8	86.8715	1.94959	0.627883	3.10503	0.00190261	0.0686837
ENSG00000267284.2_8	85.2467	-2.03891	0.542739	-3.7567	0.000172165	0.0111123
ENSG00000276403.1_6	19.9059	8.31593	2.32712	3.57348	0.000352263	0.0197881
ENSG00000267279.2_11	307.727	1.98745	0.433934	4.58007	4.64822e-06	0.000569819
ENSG00000187773.8_7	2100.27	1.08205	0.307241	3.52182	0.000428601	0.0229794
ENSG00000282508.2_5	293.492	-1.44161	0.469236	-3.07225	0.00212449	0.0740801
ENSG00000141934.10_8	207.237	1.78143	0.491723	3.62282	0.000291407	0.0169773
ENSG00000129946.10_7	2442.96	-1.26104	0.392804	-3.21037	0.00132566	0.0529746
ENSG00000099860.9_8	599.926	-0.99474	0.316148	-3.14644	0.00165271	0.0626494
ENSG00000105246.6_5	168.32	2.18062	0.539946	4.0386	5.37718e-05	0.00433433
ENSG00000105255.11_7	244.452	1.26061	0.403971	3.12054	0.0018052	0.0667748
ENSG00000268758.7_6	353.353	2.74513	0.477303	5.75134	8.85401e-09	2.5728e-06
ENSG00000214248.2_8	69.0614	1.93433	0.597366	3.2381	0.00120327	0.0499443
ENSG00000226480.1_2	32.2974	4.97098	1.3804	3.60111	0.000316864	0.018102
ENSG00000214212.9_6	648.131	1.62279	0.367784	4.41234	1.02258e-05	0.00109902
ENSG00000130176.8_6	5992.07	-1.06673	0.345026	-3.09175	0.00198983	0.0711772
ENSG00000105143.12_8	65.9816	2.52338	0.785151	3.21387	0.00130958	0.0526939
ENSG00000179913.11_6	324.878	1.66689	0.338015	4.93139	8.1645e-07	0.000127264
ENSG00000105640.13_5	73585.1	-0.995348	0.300425	-3.31313	0.000922589	0.040741
ENSG00000213988.11_6	316.452	2.01649	0.644453	3.129	0.00175402	0.0654269
ENSG00000256229.8_5	295.557	1.84445	0.401885	4.58949	4.44321e-06	0.000551711
ENSG00000280079.1_6	87.2925	2.57036	0.662593	3.87924	0.000104782	0.00742849
ENSG00000237440.9_10	113.078	2.69334	0.703399	3.82904	0.000128646	0.0088278
ENSG00000196705.8_7	6089.36	-0.979621	0.281572	-3.47911	0.000503085	0.0253015
ENSG00000240522.1_2	130.727	-1.5542	0.442983	-3.50849	0.000450657	0.0236766
ENSG00000160321.15_8	335.343	2.17383	0.73746	2.94773	0.00320118	0.096846
ENSG00000196109.9_8	50.1823	3.06356	0.984551	3.11163	0.00186055	0.0676561
ENSG00000205209.7_6	77.4094	2.17588	0.71561	3.04059	0.00236115	0.07875
ENSG00000161270.19_6	196.22	-1.78952	0.411918	-4.34436	1.39681e-05	0.0014171
ENSG00000198182.13_9	848.039	1.22328	0.411071	2.97583	0.00292194	0.0907306
ENSG00000104814.13_7	272.782	-1.57875	0.362623	-4.3537	1.3386e-05	0.00136985
ENSG00000105193.9_6	140345	-0.795795	0.24239	-3.28312	0.00102664	0.0443378
ENSG00000237118.3_8	959.052	-1.56586	0.394803	-3.96617	7.30358e-05	0.00549215
ENSG00000226763.5_6	542.043	2.06371	0.350484	5.88817	3.9049e-09	1.32873e-06
ENSG00000263002.8_5	259.446	1.27962	0.389114	3.28855	0.00100705	0.0436517
ENSG00000062370.16_9	433.044	1.5518	0.442009	3.5108	0.000446756	0.0235242
ENSG00000204866.8_4	1087.31	-1.60845	0.513571	-3.13189	0.00173687	0.0649933
ENSG00000105373.19_8	30049.8	-0.96405	0.327448	-2.94413	0.00323864	0.0975582
ENSG00000169169.15_8	508.426	1.22539	0.389457	3.1464	0.00165294	0.0626494
ENSG00000213024.12_8	12329.8	0.85701	0.234869	3.64888	0.000263382	0.0156942
ENSG00000169136.12_6	46180.6	-1.73464	0.557517	-3.11136	0.00186229	0.0676561
ENSG00000131398.15_6	5964.32	0.761855	0.245332	3.1054	0.00190024	0.0686837
ENSG00000129450.8_4	333.568	1.11317	0.362727	3.0689	0.00214847	0.0745988
ENSG00000105492.16_8	3278.11	1.57431	0.511984	3.07492	0.00210559	0.0735302
ENSG00000269959.1_7	370.705	1.11267	0.338104	3.29091	0.000998627	0.0435272
ENSG00000182310.14_6	839.022	1.04854	0.276618	3.79058	0.000150299	0.0100215
ENSG00000105509.11_6	188.182	3.6513	0.73004	5.00152	5.68814e-07	9.49517e-05
ENSG00000171051.9_6	83.8258	2.20435	0.614461	3.58745	0.000333929	0.0188935
ENSG00000129991.13_8	4400.58	-1.55379	0.336679	-4.61505	3.93008e-06	0.000497325
ENSG00000176593.8_9	91.8035	3.3321	1.10049	3.02783	0.00246319	0.0806344
ENSG00000235974.1_4	82.2563	3.1679	0.967427	3.27456	0.00105827	0.0454534
ENSG00000268660.1_4	118.26	3.49602	1.04388	3.34906	0.000810869	0.0369157
ENSG00000283103.3_3	1160.23	-0.821958	0.278525	-2.95111	0.00316637	0.0960397
ENSG00000131849.12_6	625.624	1.12398	0.329196	3.41431	0.000639432	0.0308408
ENSG00000269473.1_6	408.453	1.69583	0.37535	4.51799	6.24303e-06	0.000723853
ENSG00000215397.4_7	135.814	-2.06637	0.44754	-4.61718	3.88995e-06	0.000494907
ENSG00000088881.21_6	218.681	-1.67589	0.567857	-2.95126	0.00316482	0.0960397
ENSG00000088899.15_6	1308.04	-1.09594	0.355473	-3.08304	0.00204897	0.0724122
ENSG00000226948.2_8	83.5337	2.97675	0.671291	4.43437	9.2343e-06	0.00100624
ENSG00000101265.16_6	227.267	1.86061	0.490563	3.79281	0.000148951	0.00995986
ENSG00000089199.10_8	129.652	1.77113	0.538167	3.29105	0.000998143	0.0435272
ENSG00000125864.14_7	2106.2	1.5475	0.287146	5.38925	7.0754e-08	1.58603e-05
ENSG00000230400.3_8	159.621	5.05622	0.62154	8.135	4.11949e-16	1.07734e-12
ENSG00000101000.6_7	3367.42	1.75923	0.364951	4.82044	1.43239e-06	0.00021338
ENSG00000101407.13_6	8211.74	-1.1334	0.261954	-4.32671	1.51356e-05	0.00150985
ENSG00000149633.12_11	25.7124	3.39103	1.00312	3.38048	0.000723582	0.0338039
ENSG00000124249.7_6	89.6837	2.50407	0.627743	3.98901	6.63485e-05	0.00508679
ENSG00000276223.1_7	82.0203	2.40313	0.554061	4.33731	1.44239e-05	0.00145706
ENSG00000026559.14_8	382.433	1.35537	0.431372	3.14199	0.00167801	0.0632938
ENSG00000054793.14_8	600.027	2.72312	0.50623	5.37922	7.4811e-08	1.66116e-05
ENSG00000182463.16_7	112.644	2.45744	0.495247	4.96205	6.97512e-07	0.000111683
ENSG00000198768.11_8	24.7885	4.16266	1.35197	3.07896	0.00207723	0.0731914
ENSG00000235590.7_9	335.669	1.92856	0.546617	3.52817	0.000418444	0.0225376
ENSG00000196074.13_9	4331.17	1.96269	0.315266	6.22551	4.79997e-10	2.21523e-07
ENSG00000101188.5_5	202.36	1.5495	0.387559	3.99811	6.38515e-05	0.00494366
ENSG00000228705.2_9	372.361	2.54425	0.442167	5.75404	8.71367e-09	2.56367e-06
ENSG00000101197.13_5	97.5151	2.05621	0.53744	3.82594	0.000130274	0.00891358
ENSG00000101210.13_9	17301.5	-0.959129	0.306611	-3.12816	0.00175905	0.0655108
ENSG00000156265.16_7	44.7709	2.43353	0.803549	3.02848	0.00245789	0.0806344
ENSG00000231106.2_7	246.463	1.54085	0.498722	3.0896	0.0020043	0.0714774
ENSG00000230479.1_7	323.813	2.37413	0.369876	6.41872	1.37421e-10	7.3511e-08
ENSG00000233818.1_9	603.66	2.18763	0.373243	5.86115	4.59675e-09	1.50269e-06
ENSG00000157542.11_8	1227.25	1.05015	0.300694	3.49244	0.000478638	0.0248026
ENSG00000157554.19_8	80.6911	3.68662	0.745541	4.94489	7.61865e-07	0.000121162
ENSG00000227039.6_8	195.515	2.45649	0.462971	5.30593	1.121e-07	2.3558e-05
ENSG00000184274.3_7	40.3183	5.29479	1.11975	4.72856	2.26123e-06	0.000313074
ENSG00000233922.3_7	14863.7	0.797325	0.253692	3.14289	0.0016729	0.0632244
ENSG00000184058.14_6	2504.07	-1.08014	0.368084	-2.9345	0.00334081	0.0995351
ENSG00000275772.1_7	17.3251	5.66383	1.77696	3.18738	0.0014357	0.0562265
ENSG00000280623.1_3	2198.87	-1.51229	0.286244	-5.2832	1.26946e-07	2.58227e-05
ENSG00000196431.4_5	1533.5	1.03037	0.303651	3.39328	0.000690604	0.0326281
ENSG00000225783.8_9	2346.03	1.1213	0.338384	3.31371	0.000920673	0.0407329
ENSG00000128342.5_6	175.755	3.07823	0.575789	5.3461	8.98719e-08	1.95863e-05
ENSG00000184949.16_9	561.901	1.11197	0.33039	3.36561	0.000763735	0.0351782
ENSG00000100311.17_8	693.126	1.30209	0.331681	3.92574	8.64651e-05	0.00632028
ENSG00000286393.1_3	169.544	2.22129	0.733807	3.02708	0.00246933	0.0807136
ENSG00000130487.9_5	901.343	-3.62149	0.483724	-7.4867	7.06293e-14	8.019e-11
ENSG00000165192.14_7	82.6725	-2.82357	0.947845	-2.97893	0.00289253	0.0902936
ENSG00000047230.15_8	5846.92	-0.816575	0.256028	-3.18939	0.00142572	0.0559288
ENSG00000067992.16_9	778.938	-1.91825	0.566115	-3.38844	0.000702909	0.0330227
ENSG00000226372.4_6	229.653	-1.51968	0.410403	-3.7029	0.000213151	0.0133075
ENSG00000169306.10_6	36.8645	4.15186	0.921301	4.50652	6.59008e-06	0.000752965
ENSG00000147041.12_7	3263.94	1.62936	0.282074	5.77635	7.63398e-09	2.27444e-06
ENSG00000101955.15_8	905.238	1.96219	0.288924	6.79135	1.11089e-11	7.69033e-09
ENSG00000171483.13_5	1209.45	2.56097	0.298907	8.56778	1.05498e-17	3.5473e-14
ENSG00000126752.7_2	5408.18	1.22201	0.359914	3.39528	0.000685581	0.0324678
ENSG00000204648.11_6	78.098	2.47725	0.763559	3.24435	0.0011772	0.0490594
ENSG00000102057.10_7	1274.1	-0.879021	0.266658	-3.29644	0.00097918	0.0428382
ENSG00000102001.13_7	858.944	-1.20985	0.298374	-4.0548	5.01763e-05	0.0041076
ENSG00000147081.15_9	99.096	1.76984	0.575563	3.07497	0.00210526	0.0735302
ENSG00000147082.18_5	177.819	3.20109	0.526054	6.08509	1.16424e-09	4.84675e-07
ENSG00000158639.12_2	204.191	-2.99776	0.798005	-3.75657	0.000172255	0.0111123
ENSG00000131080.15_7	370.795	2.5047	0.445477	5.62251	1.88203e-08	4.92193e-06
ENSG00000147166.11_5	1300.08	1.41074	0.374648	3.76552	0.000166205	0.0108666
ENSG00000242732.4_8	119.638	2.1909	0.480117	4.56326	5.03648e-06	0.000613553
ENSG00000131269.19_10	9700.17	-1.65252	0.325166	-5.08207	3.73343e-07	6.81191e-05
ENSG00000147138.2_5	21.6486	-6.62619	1.55356	-4.26517	1.99746e-05	0.00191894
ENSG00000102271.14_7	260.328	-1.53318	0.399418	-3.83853	0.000123772	0.00854316
ENSG00000204086.4_4	291.842	3.033	0.740492	4.09593	4.20481e-05	0.00354726
ENSG00000196970.8_2	1345.3	1.73962	0.290398	5.99047	2.09234e-09	7.94313e-07
ENSG00000133138.20_8	619.045	1.24308	0.319488	3.89084	9.98983e-05	0.00719054
ENSG00000133131.15_9	356.763	1.82663	0.401997	4.54389	5.52248e-06	0.000656478
ENSG00000170925.3_5	55.1913	3.2091	0.791665	4.0536	5.04353e-05	0.0041076
ENSG00000243978.8_8	689.811	1.6827	0.515495	3.26425	0.00109756	0.0465463
ENSG00000123496.8_7	1941.44	4.75774	0.513324	9.2685	1.88785e-20	8.88686e-17
ENSG00000102021.11_5	522.161	1.78272	0.539743	3.30291	0.000956858	0.0421752
ENSG00000181433.9_3	6311.52	0.898769	0.263504	3.41084	0.000647632	0.0311088
ENSG00000102239.5_5	45.6012	3.10904	0.746352	4.16565	3.10465e-05	0.00276796
ENSG00000231164.1_4	23.3647	-6.11229	1.35375	-4.51509	6.32907e-06	0.000730232
ENSG00000234062.8_9	777.567	1.90237	0.396603	4.79667	1.61327e-06	0.000235848
ENSG00000155966.14_7	108.636	-3.36744	0.72881	-4.62047	3.82879e-06	0.000489774
ENSG00000102287.19_7	45743	1.31781	0.247139	5.33225	9.70037e-08	2.05692e-05
ENSG00000264120.1	3111.4	1.24706	0.258338	4.82727	1.38419e-06	0.000207514
ENSG00000268089.3_6	3752.58	3.65446	1.15276	3.17019	0.00152342	0.0587815
ENSG00000067842.17_5	51.4432	2.5823	0.854227	3.02296	0.00250312	0.0814881
ENSG00000198910.14_8	496.54	-1.19956	0.401097	-2.99069	0.00278349	0.0879398
ENSG00000102032.13_7	4087.01	-1.11412	0.319104	-3.49139	0.000480519	0.0248026
