# Supplementary material
Source: HighWire-hosted journal article supplement (doi:10.1101/rna.080661.125)
Supplement: Supplemental_Figure_Legends.docx [file Supplemental_Figure_Legends.docx]

**Supplementary Figures**

**Sup. Figure 1: A.** rMATS analysis for the differential alternative splicing was performed on RNA-seq of WT K562 or SF3B1K700E. **B-G** RPKM for each alignment track are shown as sashimi plots. Arcs denote splice junctions, quantified in spanning reads, as specified near each exon junction of ARPP19 **(B)**, ECT2 **(C)**, LRIF1 **(D)**, FANCD2 **(E)**, STAG2 **(F)**, SEPTIN6 **(G)**. **H.** Schematic representation of primer design for detecting alternative splicing events for ARPP19, ENSA, ECT2, SEPTIN6 and STAG2 genes. Primers (black arrows) were positioned in flanking constitutive exons to amplify and distinguish between splice isoforms. Exons are shown as pink boxes, introns as black lines, and alternative splicing events.

**Sup. Figure 2. A.** RNA was extracted from WT K562 and K562K700E cells, converted to cDNA and RT-PCR was performed.RT-PCR analysis of total mRNA of ARPP19, ENSA, ECT2, LRIF1, FANCD2, SEPTIN6 and STAG2 relative to CycloA and hTBP reference genes. Values represent averages of three independent experiments ±SD *p<0.05; **p<0.01; ***p<0.005; ****p<0.001; Student’s t-test. **B-C**. Cells were transfected with siGFP or siSF3B1 for 72 h. RNA was extracted, converted to cDNA and RT-PCR was performed. **(B)** ARPP19, ENSA, ECT2, LRIF1, FANCD2, SEPTIN6 and STAG2 relative to CycloA and hTBP reference genes **(C)**. Values represent averages of three independent experiments ±SD *p<0.05; **p<0.01; ***p<0.005; ****p<0.001; Student’s t-test, compared to total mRNA values for cells transfected with siGFP (y=1).

**Sup. Figure 3. A**. K562 cells were treated with thymidine at a final concentration of 2 mM, for 18 h. Cells were washed, then after 9 h treated again with 2 mM thymidine. After 18 h cells were collected and analysed by RT-PCR. RNA was extracted, converted to cDNA and RT-PCR analysis of the total mRNA relative to CycloA and hTBP reference genes for ARPP19, ENSA, ECT2, SEPTIN6 and STAG2 was performed. Values represent averages of three independent experiments ±SD *p<0.05; Student’s t-test, compared to total mRNA for control cells. **B**. K562 cells were treated with 40 ng/ml nocodazole (NCO) for 20 h cells were collected and analyzed by RT-PCR. RNA was extracted, converted to cDNA and RT-PCR analysis of the total mRNA relative to CycloA and hTBP reference genes for ARPP19, ENSA, ECT2, SEPTIN6 and STAG2 was performed. Values represent averages of three independent experiments ±SD *p<0.01; Student’s t-test, compared to total mRNA for control cells. **C.** HeLa cells were treated with thymidine at a final concentration of 2 mM, for 18 h. Cells were washed, then after 9 h treated again with 2 mM thymidine. After 18 h cells were collected and analyzed by RT-PCR. RNA was extracted, converted to cDNA and RT-PCR analysis of the total mRNA relative to CycloA and hTBP reference genes for ARPP19, ENSA, ECT2, SEPTIN6 and STAG2 was performed. Values represent averages of three independent experiments ±SD *p<0.05; Student’s t-test, compared to total mRNA for control cells. **D**. HeLa cells were treated with 40 ng/ml NCO for 20 h, then cells were collected and analyzed by RT-PCR. RNA was extracted, converted to cDNA and RT-PCR analysis of the total mRNA relative to CycloA and hTBP reference genes for ARPP19, ENSA, ECT2, SEPTIN6 and STAG2 was performed. Values represent averages of three independent experiments ±SD *p<0.01; Student’s t-test, compared to total mRNA for control cells.

**Sup. Figure 4. A-H.** K562 cells were treated with thymidine at a final concentration of 2 mM, for 18 h. Cells were washed, then after 9 h, treated again with 2 mM thymidine. After 18 h cells were washed and then treated with media or the DYRK1A inhibitor INDY at a final concentration of 5 μM for 6 h.Cells were collected for RT-PCR analysis. RNA was extracted, converted to cDNA and total mRNA relative to CycloA and hTBP reference genes is shown for ARPP19 (**A**), ENSA (**B**). RT-PCR analysis of the PSI relative to RT-PCR analysis of total mRNA of ECT2 exon 5 inclusion (**C&D**), SEPTIN6 exon 10 inclusion (**E&F**), and STAG2 exon 31 inclusion (**G&H**) was performed. PSI was calculated according to the formula PSI = ΔCq(inclusion isoform)/ΔCq(total mRNA). Values represent averages of three independent experiments ±SD *p<0.05; Student’s t-test compared to PSI and total mRNA for control cells. **I-P.** HeLa cells were treated with thymidine at a final concentration of 2 mM, for 18 h. Cells were washed, then after 9 h, treated again with 2 mM thymidine. After 18 h cells were washed and then treated with media or the DYRK1A inhibitor INDY at a final concentration of 5 μM for 6 h.Cells were collected for RT-PCR analysis. RNA was extracted, converted to cDNA and total mRNA relative to CycloA and hTBP reference genes is shown for ARPP19 (**I**), ENSA (**J**). RT-PCR analysis of the PSI relative to RT-PCR analysis of total mRNA of ECT2 exon 5 inclusion (**K&L**), SEPTIN6 exon 10 inclusion (**M&N**), and STAG2 exon 31 inclusion (**O&P**) was performed. PSI was calculated according to the formula PSI = ΔCq(inclusion isoform)/ΔCq(total mRNA). Values represent averages of three independent experiments ±SD *p<0.05; Student’s t-test compared to PSI and total mRNA for control cells.

**Sub. Figure 5.** K562 cells were treated with thymidine at a final concentration of 2 mM, for 18 h. Cells were washed, then after 9 h treated again with 2 mM thymidine. After 18 h cells were washed and then treated with media or the PP2A inhibitor OA at a final concentration of 20 nM for 12 h.Cells were collected for RT-PCR. RNA was extracted, converted to cDNA, and total mRNA relative to CycloA and hTBP reference genes is shown for ARPP19 (**A**), ENSA (**B**). RT-PCR analysis of the PSI relative to RT-PCR analysis of total mRNA of ECT2 exon 5 inclusion (**C&D**), SEPTIN6 exon 10 inclusion (**E&F**), and STAG2 exon 31 inclusion (**G&H**) was performed. PSI was calculated according to the formula PSI = ΔCq(inclusion isoform)/ΔCq(total mRNA). Values represent averages of three independent experiments ±SD *p<0.05; Student’s t-test. **I-P.** HeLa cells were treated under the same conditions and were harvested for RT-PCR. RNA was extracted, converted to cDNA and RT-PCR performed. Total mRNA relative to CycloA and hTBP reference genes is shown for ARPP19 (**I**), ENSA (**J**). RT-PCR analysis of the PSI relative to RT-PCR analysis of total mRNA of ECT2 exon 5 inclusion (**K&L**), SEPTIN6 exon 10 inclusion (**M&N**), and STAG2 exon 31 inclusion (**O&P**) was performed. PSI was calculated according to the formula PSI = ΔCq(inclusion isoform)/ΔCq(total mRNA). Values represent averages of three independent experiments ±SD *p<0.05; Student’s t-test.

**Sup. Figure 6. A**-**B**. Kaplan-Meier curves for ECT2 exon 5 inclusion (**A**); and total mRNA of ECT2 (**B**). **C-D.** Kaplan-Meier curves for STAG2 exon 31 inclusion (**C**); and total mRNA of STAG2 (**D**). **E-F.** Kaplan-Meier curves for SEPTIN6 exon 10 inclusion (**E**); and total mRNA of SEPTIN6 (**F**). PSI>0 (red) and PSI=0 (blue). Error bars represent 95% confidence intervals of the mean.

**Sup. Figure 7. A-C.** ENSA-short/long were cloned to pLentic CMV GFP vector and lentiviral particles were produced by expressing ENSA short or long isoform in the HEK293T packaging cell-line using TransIT-X2 transfection reagent. HeLa cells were infected with viral particles to overexpress either the short or long isoform of ENSA. Protein was collected, and immunoblotting was conducted with the indicated antibodies and quantified relative to the housekeeping protein tubulin (**A**). The stable cell lines were arrested at G2/M using NCO for 20 h, then the cells were released for 3 h, collected and analyzed by flow cytometry (**B&C**).
