# Supplementary material
Source: HighWire-hosted journal article supplement (doi:10.1101/rna.080661.125)
Supplement: Supplemental_Table_S1_.xlsx [file Supplemental_Table_S1_.xlsx]

## Sheet: Sheet1
Supplementary Table S1. Primers used in this study
Cyclophilin A total mRNA (reference gene)	forward	GTCAACCCCACCGTGTTCTT
	reverse	CTGCTGTCTTTGGGACCTTGT
hTBP total mRNA (reference gene)	forward	CGCCAGCTTCGGAGAGTTC
	reverse	ACAACCAAGATTCACTGTGGATACA
SF3B1 total mRNA	forward	TGCAGATGGCTTCTATTCTGCTGC
	reverse	GGGTTCCTGGGTTGCTAATCCGG
ARPP19 total mRNA	forward	CGGTTGCAGAAAGGGCAAAA
	reverse	GTTGAGGAAGGTCTTGCGGA
ARPP19 exon 2 inclusion	forward	AACACAACATGCTCCCTTGG
	reverse	TCTGAACCTCCAGGCTTTTG
ENSA total mRNA	forward	TACAACATGGCCAAAGCCAAG
	reverse	TGGTGACGAGCGAGGACTT
ENSA exon 3 inclusion	forward	GCTTCTCTGTGCGGATGAAATG
	reverse	GTGATCACCAGTCACCAGGTTC
ECT2 total mRNA	forward	TGGAGTCAGTGGAAGAATTTGA
	reverse	ACAACGGGCGACATGAAAAT
ECT2 exon 5 inclusion	forward	AGTTGTCCTGGAAAATCGGATG
	reverse	TCCAATAACTCTACAATCAGCCT
SEPTIN6 total mRNA	forward	TGAGGCCAAAAGGAACGAGT
	reverse	GGTGCAGTTTCTTCAGACGG
SEPTIN6 exon 10 inclusion	forward	GCACCAGGACGAGAAGAAGA
	reverse	CCTGGGTCTCATGCAGCA
STAG2 total mRNA	forward	GGGCATGCAGCTTTCACTC
	reverse	GGGTGTGCAGTGTTTGTTCT
STAG2 exon 31 inclusion	forward	GAACATCATCAAACACCT
	reverse	CATCCATGTTACCTGCGTG
LRIF1 total mRNA	forward	AGGTGCCCAAGGAAGAAATG
	reverse	GGTTTTGCTGTGACTCGTGA
LRIF1 exon 2 inclusion	forward	CGCAGAGGAAAATTCAGGCAA
	reverse	TGTTGAGGGAGGAACAGCAA
FANCD2 total mRNA	forward	AAAGCACTGTACGGACTGGA
	reverse	CCGTTATGCTGTCTCTCCAC
FANCD2 exon 22 inclusion	forward	ATGCCTTCGTAGTGGACTCC
	reverse	TCCAGTCCGTACAGTGCTTT
