# Supplementary material
Source: HighWire-hosted journal article supplement (doi:10.1101/rna.080661.125)
Supplement: Supplemental_Table_S2_Significant_AS_Events.xlsx [file Supplemental_Table_S2_Significant_AS_Events.xlsx]

## Sheet: final_rMATS_significat_results_
Supplementary Table S1: Significant alternative splicing events in SF3B1-K700E K562 cells
chr	start	end	strand	ID	geneSym	geneID	IncDiff	FDR	EventType
chrX	154012302	154012383	-	76	MPP1	ENSG00000130830.15_8	0.043	2.52455e-13	SE
chrX	153995271	153995336	+	110	DKC1	ENSG00000130826.18_6	0.009	0.0744606	SE
chrX	153056018	153056030	-	167	IDH3G	ENSG00000067829.19_7	0.026	0.0678891	SE
chrX	152958495	152958630	+	185	SLC6A8	ENSG00000130821.17_9	-0.012	4.93123e-07	SE
chrX	152097118	152097205	+	204	ZNF185	ENSG00000147394.18_5	0.748	9.293e-05	SE
chrX	149116295	149116393	+	247	LINC00894	ENSG00000235703.6_9	0.187	0.00755844	SE
chrX	138813809	138813914	-	272	ATP11C	ENSG00000101974.14_7	0.108	0.00104872	SE
chrX	135760094	135760115	-	281	ARHGEF6	ENSG00000129675.16_6	0.087	1.91071e-05	SE
chrX	134425397	134425489	-	299	ZNF75D	ENSG00000186376.15_6	0.051	0.0971804	SE
chrX	131206840	131206903	+	355	STK26	ENSG00000134602.16_5	0.041	0.0984217	SE
chrX	128718320	128718344	+	393	OCRL	ENSG00000122126.17_8	0.055	0.0303547	SE
chrX	123155216	123155281	+	399	STAG2	ENSG00000101972.19_5	0.221	0.00633885	SE
chrX	123155216	123155281	+	401	STAG2	ENSG00000101972.19_5	0.071	0.000667024	SE
chrX	123224703	123224814	+	408	STAG2	ENSG00000101972.19_5	-0.149	3.7167e-13	SE
chrX	122747249	122747407	-	417	THOC2	ENSG00000125676.20_7	0.031	0.00197172	SE
chrX	122747249	122747407	-	418	THOC2	ENSG00000125676.20_7	0.028	0.0884995	SE
chrX	108939372	108939425	-	568	ACSL4	ENSG00000068366.20_8	0.064	0.00650804	SE
chrX	106397325	106397476	-	584	NUP62CL	ENSG00000198088.10_9	0.055	0.0937422	SE
chrX	102612010	102612089	+	599	TCEAL9	ENSG00000185222.10_4	-0.044	0.00104859	SE
chrX	100416516	100416558	+	620	CENPI	ENSG00000102384.13_4	-0.068	0.0612492	SE
chrX	100306239	100306722	-	661	TRMT2B	ENSG00000188917.15_7	-0.061	0.0455385	SE
chrX	100306632	100306722	-	664	TRMT2B	ENSG00000188917.15_7	-0.096	0.0208253	SE
chrX	98040024	98040122	+	681	AL157778.1	ENSG00000281566.3_8	-0.189	0.0013156	SE
chrX	98040024	98040122	+	682	AL157778.1	ENSG00000281566.3_8	-0.113	0.0995652	SE
chrX	98040024	98040122	+	684	AL157778.1	ENSG00000281566.3_8	0.001	0.0359877	SE
chrX	98096938	98096999	+	690	AL157778.1	ENSG00000281566.3_8	-0.248	0.00497248	SE
chrX	76972607	76972720	-	734	ATRX	ENSG00000085224.23_8	-0.076	0.00439026	SE
chrX	73505749	73506005	-	768	FTX	ENSG00000230590.11_9	-0.279	0.0219619	SE
chrX	73061126	73061156	-	787	XIST	ENSG00000229807.12_8	-0.179	0.0346781	SE
chrX	71840574	71840751	-	796	PHKA1	ENSG00000067177.15_7	-0.039	0.0924693	SE
chrX	71708782	71708891	-	806	HDAC8	ENSG00000147099.21_7	-0.044	0.032907	SE
chrX	71710778	71710856	-	812	HDAC8	ENSG00000147099.21_7	-0.698	3.00254e-05	SE
chrX	71715005	71715118	-	815	HDAC8	ENSG00000147099.21_7	-0.043	0.0251357	SE
chrX	71525151	71525272	-	826	CITED1	ENSG00000125931.11_10	0.075	0.0461918	SE
chrX	70775039	70775235	+	840	OGT	ENSG00000147162.14_5	-0.011	0.083419	SE
chrX	70521986	70522036	+	857	ITGB1BP2	ENSG00000147166.11_5	-0.144	0.0704331	SE
chrX	65475946	65476172	+	941	HEPH	ENSG00000089472.16_8	-0.008	0.0481157	SE
chrX	65236906	65237031	+	945	MIR223HG	ENSG00000274536.7_9	-0.398	4.90826e-05	SE
chrX	62736789	62736962	-	970	LINC01278	ENSG00000235437.8_9	-0.147	0.0173397	SE
chrX	62736789	62736980	-	972	LINC01278	ENSG00000235437.8_9	-0.188	0.00185189	SE
chrX	55050189	55050300	-	1011	ALAS2	ENSG00000158578.21_10	-0.011	0.000428435	SE
chrX	55050189	55050300	-	1012	ALAS2	ENSG00000158578.21_10	-0.17	0	SE
chrX	54114187	54114397	-	1022	FAM120C	ENSG00000184083.12_7	0.49	0.000144446	SE
chrX	53264964	53265014	-	1046	IQSEC2	ENSG00000124313.17_10	0.051	0.0593264	SE
chrX	52985470	52985953	-	1071	FAM156A	ENSG00000268350.7_9	0.415	0.00238674	SE
chrX	49050622	49050818	-	1098	SYP	ENSG00000102003.11_6	0.06	5.91594e-05	SE
chrX	49054173	49054298	-	1099	SYP	ENSG00000102003.11_6	0.095	0.0031616	SE
chrX	48649497	48649736	+	1148	GATA1	ENSG00000102145.15_6	0.057	1.61137e-11	SE
chrX	48208974	48209022	-	1153	SSX3	ENSG00000165584.16_6	0.087	0.00113291	SE
chrX	47030426	47030657	+	1173	RBM10	ENSG00000182872.16_7	0.119	0.0225312	SE
chrX	44919266	44919401	+	1216	KDM6A	ENSG00000147050.16_5	-0.097	0.0982613	SE
chrX	44919266	44919401	+	1217	KDM6A	ENSG00000147050.16_5	-0.079	0.000577108	SE
chrX	44919853	44920009	+	1218	KDM6A	ENSG00000147050.16_5	-0.057	0.0101922	SE
chrX	44023167	44023273	-	1235	EFHC2	ENSG00000183690.13_7	-0.053	0.0076347	SE
chrX	39930889	39930943	-	1304	BCOR	ENSG00000183337.17_7	-0.076	0.00441104	SE
chrX	37245851	37245942	+	1316	PRRG1	ENSG00000130962.18_5	-0.117	0.00405538	SE
chrX	18918787	18918817	-	1450	PHKA2	ENSG00000044446.12_6	0.167	0.0149681	SE
chrX	9502939	9503074	+	1551	TBL1X	ENSG00000101849.17_9	-0.028	0.0297784	SE
chr22	50830295	50830444	+	1616	PPP6R2	ENSG00000100239.16_8	0.074	0.06756	SE
chr22	50558930	50559045	+	1643	MOV10L1	ENSG00000073146.16_6	-0.515	0.0352334	SE
chr22	43533086	43533304	-	1725	MCAT	ENSG00000100294.13_8	-0.079	0.0241854	SE
chr22	42084082	42084331	-	1739	SNU13	ENSG00000100138.15_8	0.029	3.91144e-09	SE
chr22	42084155	42084331	-	1740	SNU13	ENSG00000100138.15_8	0.024	1.30345e-11	SE
chr22	40666125	40666284	+	1807	TNRC6B	ENSG00000100354.21_9	0.163	0.0602874	SE
chr22	39150646	39150711	-	1836	SUN2	ENSG00000100242.15_7	0.321	0.00965245	SE
chr22	38759058	38759109	-	1853	TPTEP2	ENSG00000244627.5_9	-0.434	0.0176138	SE
chr22	38074489	38074661	+	1887	LGALS1	ENSG00000100097.12_5	0.008	0.00218598	SE
chr22	32019669	32019835	-	1976	PISD	ENSG00000241878.11_7	-0.034	0.0892206	SE
chr22	31588669	31588688	+	2027	RNF185	ENSG00000138942.16_5	-0.436	0.00234267	SE
chr22	31592921	31593144	+	2040	RNF185	ENSG00000138942.16_5	-0.457	0.00102546	SE
chr22	31289803	31289988	+	2066	OSBP2	ENSG00000184792.16_8	0.024	0.0588312	SE
chr22	30928511	30928700	-	2078	SEC14L6	ENSG00000214491.8_7	0.07	0.0113253	SE
chr22	22012931	22012975	+	2289	AP000553.1	ENSG00000207751.3_5	-0.169	0.0867993	SE
chr22	21098915	21099008	-	2353	PI4KA	ENSG00000241973.11_7	0.028	0.000205616	SE
chr22	21104192	21104282	-	2354	PI4KA	ENSG00000241973.11_7	0.021	2.86808e-06	SE
chr22	20981449	20982100	-	2376	SMPD4P1	ENSG00000223553.6_8	-0.047	0.0389366	SE
chr22	20748852	20748952	+	2428	ZNF74	ENSG00000185252.19_6	-0.042	0.00320677	SE
chr22	20303641	20303742	-	2435	DGCR6L	ENSG00000128185.10_7	0.054	0.0392423	SE
chr22	20080331	20080430	+	2442	DGCR8	ENSG00000128191.16_6	0.012	0.0122158	SE
chr22	19949219	19949397	+	2459	COMT	ENSG00000093010.14_7	0.021	0.0160677	SE
chr22	19223218	19223392	-	2505	CLTCL1	ENSG00000070371.16_7	-0.026	0.0801775	SE
chr21	47333864	47334008	+	2595	PCBP3	ENSG00000183570.16_9	0.395	0.0022263	SE
chr21	46685936	46686142	-	2612	POFUT2	ENSG00000186866.16_5	0.128	4.20646e-11	SE
chr21	45938141	45938215	+	2655	TSPEAR-AS2	ENSG00000182912.6_7	-0.035	0.0437048	SE
chr21	44521475	44521542	-	2719	U2AF1L5	ENSG00000275895.7_8	0.051	0.0261729	SE
chr21	40800097	40800429	-	2760	LCA5L	ENSG00000157578.13_5	0.203	0.0854766	SE
chr21	40801056	40801137	-	2761	LCA5L	ENSG00000157578.13_5	0.108	0.0840216	SE
chr22	19338880	19338969	-	2778	HIRA	ENSG00000100084.14_7	0.04	6.14891e-06	SE
chr22	19365391	19365589	-	2798	HIRA	ENSG00000100084.14_7	0.014	0.0158738	SE
chr21	38612796	38612940	-	2818	VPS26C	ENSG00000157538.14_7	-0.021	0.0908134	SE
chr21	33954509	33954725	-	2979	CFAP298-TCP10L	ENSG00000265590.10_10	0.08	0.0117277	SE
chr21	30724899	30724984	+	2993	BACH1-IT1	ENSG00000248476.1_6	0.276	0.0813129	SE
chr21	30380081	30380444	-	3011	RWDD2B	ENSG00000156253.7_6	-0.039	0.00449769	SE
chr21	30336898	30337088	-	3018	LTN1	ENSG00000198862.14_8	0.076	0.068868	SE
chr21	19935632	19935690	-	3072	MIR548XHG	ENSG00000224141.6_8	-0.173	0.00650533	SE
chr21	17966659	17966774	+	3103	MIR99AHG	ENSG00000215386.13_8	-0.285	0.0167953	SE
chr21	17196357	17196485	+	3115	USP25	ENSG00000155313.15_5	-0.027	0.0654182	SE
chr21	16097845	16097968	-	3133	AF127936.1	ENSG00000232884.9_10	0.222	0.0362186	SE
chr21	16097845	16097968	-	3134	AF127936.1	ENSG00000232884.9_10	0.31	0.000585046	SE
chr21	16112573	16112719	-	3138	AF127936.1	ENSG00000232884.9_10	0.127	0.00803288	SE
chr21	16115580	16115694	-	3154	AF127936.1	ENSG00000232884.9_10	0.172	0.0337554	SE
chr21	16123183	16123230	-	3167	AF127936.1	ENSG00000232884.9_10	-0.145	0.00363615	SE
chr21	16123183	16123230	-	3168	AF127936.1	ENSG00000232884.9_10	-0.065	0.0694469	SE
chr21	16125644	16125715	-	3173	AF127936.1	ENSG00000232884.9_10	-0.142	0.00498844	SE
chr21	10908824	10908895	-	3201	AF254983.1	ENSG00000273840.1_8	0.186	0.00117323	SE
chr21	10985044	10985102	-	3213	AF254983.1	ENSG00000273840.1_8	-0.07	0.0379222	SE
chr21	10987768	10987877	-	3214	AF254983.1	ENSG00000273840.1_8	-0.042	0.0953331	SE
chr20	62821415	62821513	+	3245	MYT1	ENSG00000196132.14_8	-0.291	0.00234362	SE
chr20	62723318	62723469	+	3254	OPRL1	ENSG00000125510.18_8	-0.171	0.0961892	SE
chr20	61299363	61299536	+	3326	SLCO4A1	ENSG00000101187.16_6	-0.061	0.0676002	SE
chr20	60879516	60879633	+	3329	ADRM1	ENSG00000130706.13_7	0.027	0.0063457	SE
chr20	58482418	58482479	-	3381	SYCP2	ENSG00000196074.13_9	0.099	0.00601397	SE
chr20	58487427	58487473	-	3382	SYCP2	ENSG00000196074.13_9	0.123	0.0002197	SE
chr20	57612245	57612335	-	3393	PRELID3B	ENSG00000101166.16_6	-0.041	5.801e-06	SE
chr20	57473995	57474040	+	3411	GNAS	ENSG00000087460.26_9	-0.057	0.00118249	SE
chr20	57473995	57474040	+	3412	GNAS	ENSG00000087460.26_9	-0.124	2.03159e-06	SE
chr20	57234678	57234690	+	3431	STX16	ENSG00000124222.22_7	-0.088	0.00737497	SE
chr20	54965611	54965721	-	3463	AURKA	ENSG00000087586.17_5	0.046	0.0498909	SE
chr20	52573970	52574036	-	3472	BCAS1	ENSG00000064787.13_7	0.219	0.00269614	SE
chr20	48780175	48780570	-	3512	LINC01275	ENSG00000237595.5_10	-0.265	4.38377e-06	SE
chr20	46211926	46212005	+	3589	NCOA3	ENSG00000124151.19_6	-0.076	3.7559e-05	SE
chr20	45228609	45228676	-	3609	SLC13A3	ENSG00000158296.14_9	-0.051	0.0376228	SE
chr20	44984440	44984513	-	3621	SLC35C2	ENSG00000080189.15_8	0.022	0.0854824	SE
chr20	44047491	44047619	+	3645	PIGT	ENSG00000124155.18_9	0.016	0.0766439	SE
chr20	44050022	44050223	+	3659	PIGT	ENSG00000124155.18_9	0.022	0.0180285	SE
chr20	35866804	35866852	+	3811	RPN2	ENSG00000118705.17_6	-0.018	2.64564e-07	SE
chr20	35399275	35399380	-	3829	DSN1	ENSG00000149636.16_7	0.077	0.00340127	SE
chr20	35399275	35399596	-	3836	DSN1	ENSG00000149636.16_7	0.032	0.000441566	SE
chr20	35399827	35399876	-	3845	DSN1	ENSG00000149636.16_7	0.061	0.0438242	SE
chr20	34761685	34761876	+	3874	EPB41L1	ENSG00000088367.23_9	0.272	0.0848559	SE
chr20	34806797	34806884	+	3885	EPB41L1	ENSG00000088367.23_9	0.19	0.088122	SE
chr20	33954359	33954417	-	3949	UQCC1	ENSG00000101019.22_8	0.039	0.00316019	SE
chr20	33961986	33962059	-	3951	UQCC1	ENSG00000101019.22_8	0.031	0.00995395	SE
chr20	33868456	33868632	-	3969	EIF6	ENSG00000242372.9_8	0.021	0.0831721	SE
chr20	32661624	32661672	+	4067	RALY	ENSG00000125970.12_7	-0.025	0.0327982	SE
chr20	25612793	25612924	+	4184	ZNF337-AS1	ENSG00000213742.7_8	-0.216	0.0470408	SE
chr20	25668465	25668691	+	4197	ZNF337-AS1	ENSG00000213742.7_8	-0.169	0.0311665	SE
chr20	25297683	25297714	-	4208	ABHD12	ENSG00000100997.20_9	-0.447	0.0798263	SE
chr20	25300834	25300954	-	4212	ABHD12	ENSG00000100997.20_9	-0.031	0.0865302	SE
chr20	23377708	23377837	-	4247	NAPB	ENSG00000125814.17_8	0.153	0.0887644	SE
chr20	18278932	18279108	+	4296	ZNF133	ENSG00000125846.15_4	-0.352	0.000360409	SE
chr20	10409377	10409464	-	4361	MKKS	ENSG00000125863.20_7	0.04	0.00291749	SE
chr20	5953701	5953842	+	4384	MCM8	ENSG00000125885.13_10	0.013	0.0978707	SE
chrX	151908777	151908928	+	4445	CSAG1	ENSG00000198930.13_6	0.018	0.0438438	SE
chr20	1212169	1212263	+	4549	RAD21L1	ENSG00000244588.5_5	0.466	0.0139697	SE
chr20	508576	508693	-	4586	CSNK2A1	ENSG00000101266.19_9	-0.044	0.0734688	SE
chr20	390524	390669	+	4598	RBCK1	ENSG00000125826.21_5	0.036	0.00128677	SE
chr19	59083224	59083322	+	4612	MZF1-AS1	ENSG00000267858.6_9	0.516	0.0358687	SE
chr19	55967002	55967212	-	4704	ISOC2	ENSG00000063241.8_9	0.101	0.0228905	SE
chr19	55652250	55652328	-	4732	TNNT1	ENSG00000105048.17_9	0.013	0.0121674	SE
chr19	55652553	55652670	-	4734	TNNT1	ENSG00000105048.17_9	0.06	0.000584301	SE
chr19	55653224	55653288	-	4737	TNNT1	ENSG00000105048.17_9	0.042	8.17019e-06	SE
chr19	54964724	54964835	+	4782	LENG8	ENSG00000167615.16_9	0.032	0.00137625	SE
chr19	54710143	54710330	+	4800	RPS9	ENSG00000170889.14_7	0.014	2.81305e-09	SE
chr22	24224645	24224833	+	4851	SLC2A11	ENSG00000133460.19_7	0.069	0.0724934	SE
chr19	53397031	53397109	-	4864	ZNF320	ENSG00000182986.14_7	0.112	0.0641531	SE
chr19	52785363	52785490	+	4905	ZNF766	ENSG00000196214.11_9	-0.048	0.0079021	SE
chr19	52786537	52786666	+	4906	ZNF766	ENSG00000196214.11_9	-0.034	0.0233146	SE
chr19	51305710	51305871	-	4950	C19orf48	ENSG00000167747.15_8	0.135	0.000158891	SE
chr19	51305710	51305871	-	4951	C19orf48	ENSG00000167747.15_8	-0.081	5.30056e-07	SE
chr19	51190273	51190297	-	4952	SHANK1	ENSG00000161681.15_7	-0.299	0.00377428	SE
chr19	50167930	50168103	-	5007	IRF3	ENSG00000126456.16_8	0.035	0.0557716	SE
chr19	49982165	49982304	+	5044	FLT3LG	ENSG00000090554.13_6	-0.04	0.041758	SE
chr19	49982219	49982304	+	5046	FLT3LG	ENSG00000090554.13_6	-0.085	0.0114054	SE
chr19	48752779	48752890	-	5132	CARD8	ENSG00000105483.18_8	0.148	4.49976e-09	SE
chr19	47543701	47543808	+	5235	NPAS1	ENSG00000130751.10_5	-0.124	0.0103325	SE
chr19	47544235	47544383	+	5237	NPAS1	ENSG00000130751.10_5	0.18	0.0983345	SE
chr19	46192490	46192605	-	5320	SNRPD2	ENSG00000125743.10_5	0.114	0.074798	SE
chr19	46192490	46192605	-	5321	SNRPD2	ENSG00000125743.10_5	-0.006	0.00826039	SE
chr19	45992603	45992811	-	5336	RTN2	ENSG00000125744.12_7	0.022	0.0972025	SE
chr19	45917220	45917292	-	5345	ERCC1	ENSG00000012061.16_9	0.032	2.33136e-05	SE
chr19	45641771	45641869	+	5370	PPP1R37	ENSG00000104866.11_7	0.056	0.0991727	SE
chr19	44331927	44332092	+	5415	ZNF283	ENSG00000167637.18_6	0.084	0.00973663	SE
chr19	44341204	44341331	+	5421	ZNF283	ENSG00000167637.18_6	0.095	0.0107913	SE
chr21	37429681	37429775	-	5446	SETD4	ENSG00000185917.14_7	0.107	0.0510336	SE
chr22	36900144	36900414	-	5464	FOXRED2	ENSG00000100350.14_6	0.068	4.66127e-05	SE
chr19	41942296	41942377	-	5479	DMAC2	ENSG00000105341.19_9	-0.052	0.00928677	SE
chr19	41122794	41122926	+	5523	LTBP4	ENSG00000090006.18_7	-0.024	0.000297441	SE
chr19	41128305	41128572	+	5526	LTBP4	ENSG00000090006.18_7	-0.093	3.37031e-05	SE
chr19	41128854	41128926	+	5527	LTBP4	ENSG00000090006.18_7	-0.136	1.47556e-09	SE
chr19	41128854	41128926	+	5528	LTBP4	ENSG00000090006.18_7	-0.077	0.00230499	SE
chr19	41129840	41129987	+	5530	LTBP4	ENSG00000090006.18_7	0.012	0.0392585	SE
chr19	40871624	40871837	+	5547	PLD3	ENSG00000105223.20_6	-0.066	0.0877525	SE
chr19	40871624	40871837	+	5552	PLD3	ENSG00000105223.20_6	-0.045	0.000625539	SE
chr19	38085120	38085220	-	5671	ZNF571	ENSG00000180479.14_7	-0.215	0.0595236	SE
chr19	37835511	37835676	+	5683	ZNF875	ENSG00000181666.18_8	-0.11	0.0724271	SE
chr19	37837324	37837394	+	5684	ZNF875	ENSG00000181666.18_8	-0.45	0.0158851	SE
chr19	36398631	36398664	-	5738	TYROBP	ENSG00000011600.12_5	0.21	0.00524793	SE
chr19	35988548	35988583	-	5776	DMKN	ENSG00000161249.21_9	-0.049	0.0358491	SE
chr19	35997027	35997087	-	5786	DMKN	ENSG00000161249.21_9	0.616	0.00319069	SE
chr19	35997027	35997087	-	5787	DMKN	ENSG00000161249.21_9	0.39	0.0657845	SE
chr19	35997027	35997087	-	5788	DMKN	ENSG00000161249.21_9	0.225	0.0272901	SE
chr19	35085407	35087499	-	5818	SCGB2B2	ENSG00000205209.7_6	0.441	5.21734e-07	SE
chr19	34710295	34710478	+	5853	LSM14A	ENSG00000257103.8_7	0.02	0.00312495	SE
chr19	34003498	34003682	-	5867	PEPD	ENSG00000124299.15_7	-0.037	0.0980341	SE
chr19	57125179	57125306	+	5941	ZNF71	ENSG00000197951.10_7	-0.418	0.00804239	SE
chr19	28262451	28262897	-	6019	LINC00662	ENSG00000261824.7_10	-0.135	0.00979897	SE
chr19	28262571	28262897	-	6021	LINC00662	ENSG00000261824.7_10	-0.137	0.00844736	SE
chr19	24225244	24225524	+	6036	AC092279.1	ENSG00000268362.6_10	-0.519	0.000276231	SE
chr19	23990627	23990741	+	6052	AC139769.1	ENSG00000233836.7_7	-0.041	0.00897141	SE
chr19	23938226	23938353	-	6057	ZNF681	ENSG00000196172.9_6	-0.171	0.0286464	SE
chr19	23556543	23556639	-	6060	ZNF91	ENSG00000167232.14_7	-0.04	0.0748847	SE
chr19	21926818	21926914	-	6085	ZNF100	ENSG00000197020.11_9	-0.082	0.00030625	SE
chr19	21926818	21926917	-	6087	ZNF100	ENSG00000197020.11_9	-0.083	0.000289135	SE
chr19	21927742	21927869	-	6088	ZNF100	ENSG00000197020.11_9	-0.07	0.000508205	SE
chr19	21588562	21588658	+	6092	ZNF493	ENSG00000196268.12_5	-0.082	0.0493856	SE
chr19	17599656	17599748	+	6261	SLC27A1	ENSG00000130304.17_8	0.087	0.0843139	SE
chr19	17426742	17426804	+	6275	DDA1	ENSG00000130311.11_5	-0.012	0.0863946	SE
chr19	16764845	16764936	-	6347	SMIM7	ENSG00000214046.8_6	-0.045	0.0472306	SE
chr19	16623824	16623920	+	6366	C19orf44	ENSG00000105072.9_8	0.266	0.00243669	SE
chr19	16487932	16488065	-	6369	EPS15L1	ENSG00000127527.14_7	0.09	0.0566526	SE
chr19	14507153	14507285	+	6446	ADGRE5	ENSG00000123146.20_6	-0.112	0.0658695	SE
chr19	14507888	14508035	+	6448	ADGRE5	ENSG00000123146.20_6	0.168	0.00615988	SE
chr19	14271404	14271508	-	6458	ADGRL1	ENSG00000072071.16_8	-0.105	3.439e-05	SE
chr19	14204439	14204604	-	6461	PRKACA	ENSG00000072062.14_6	0.013	0.0315265	SE
chr19	13876767	13876943	+	6473	MRI1	ENSG00000037757.14_6	-0.035	0.0896583	SE
chr19	12954342	12954421	+	6496	MAST1	ENSG00000105613.10_5	-0.059	0.00965759	SE
chr19	12787921	12788025	-	6515	AC010422.8	ENSG00000285589.1_5	0.032	0.00438732	SE
chr19	12769241	12769321	-	6525	MAN2B1	ENSG00000104774.13_7	-0.021	0.0452293	SE
chr19	38905487	38905556	-	6574	RASGRP4	ENSG00000171777.16_9	-0.037	0.0377392	SE
chr19	38905487	38905763	-	6575	RASGRP4	ENSG00000171777.16_9	-0.02	0.0750112	SE
chr19	11238683	11238761	+	6628	LDLR	ENSG00000130164.14_10	-0.012	0.0337605	SE
chr19	9448471	9448693	+	6727	ZNF559	ENSG00000188321.13_6	0.156	4.33762e-05	SE
chr19	9449169	9449258	+	6728	ZNF559	ENSG00000188321.13_6	0.131	6.04881e-06	SE
chr19	5686426	5686538	+	6904	HSD11B1L	ENSG00000167733.13_6	-0.248	0.0246804	SE
chr19	3000644	3000721	-	7006	TLE2	ENSG00000065717.15_8	0.028	0.0555855	SE
chr19	3017837	3017857	-	7010	TLE2	ENSG00000065717.15_8	-0.079	0.0507647	SE
chr19	3019696	3019771	-	7017	TLE2	ENSG00000065717.15_8	-0.533	0.00151403	SE
chr19	3025017	3025080	-	7018	TLE2	ENSG00000065717.15_8	-0.038	0.0197396	SE
chr19	2046365	2046467	-	7083	MKNK2	ENSG00000099875.14_7	-0.06	0.0956044	SE
chr19	1433737	1433826	+	7115	DAZAP1	ENSG00000071626.17_6	-0.083	0.0774335	SE
chr19	1036877	1036999	+	7136	CNN2	ENSG00000064666.15_8	0.048	0.00469259	SE
chr19	901421	901546	-	7147	R3HDM4	ENSG00000198858.10_7	0.024	0.0513869	SE
chr19	799412	799443	+	7148	PTBP1	ENSG00000011304.21_9	0.006	0.0415751	SE
chr19	805491	805569	+	7152	PTBP1	ENSG00000011304.21_9	-0.006	0.069921	SE
chr19	740351	740483	+	7160	PALM	ENSG00000099864.18_7	0.11	0.000312754	SE
chr18	47018115	47018203	-	7422	RPL17	ENSG00000265681.7_9	0.277	3.80819e-12	SE
chr18	43573570	43573669	-	7479	PSTPIP2	ENSG00000152229.18_6	-0.019	0.0367412	SE
chr18	33721099	33721164	+	7606	ELP2	ENSG00000134759.14_5	-0.136	0.000584115	SE
chrX	153908408	153908525	-	7705	GAB3	ENSG00000160219.12_6	0.02	0.0504989	SE
chr18	29703480	29703537	+	7725	RNF138	ENSG00000134758.14_6	-0.092	0.0692989	SE
chr18	23615794	23615887	-	7795	SS18	ENSG00000141380.14_8	0.158	0.000225362	SE
chr18	20953675	20953727	-	7882	TMEM241	ENSG00000134490.14_8	-0.043	0.0459089	SE
chr18	20956790	20956905	-	7885	TMEM241	ENSG00000134490.14_8	-0.102	0.0309582	SE
chr18	21010594	21010641	-	7910	TMEM241	ENSG00000134490.14_8	-0.047	0.0884959	SE
chr22	36633106	36633231	-	7924	APOL2	ENSG00000128335.14_7	0.025	0.0922967	SE
chr18	19263880	19263926	-	7935	ABHD3	ENSG00000158201.10_9	0.069	0.0606228	SE
chr18	13057583	13057732	+	7973	CEP192	ENSG00000101639.18_10	0.031	0.0341568	SE
chr18	11906201	11906308	-	8040	MPPE1	ENSG00000154889.17_9	-0.063	0.0451652	SE
chr18	3075722	3075759	-	8092	MYOM1	ENSG00000101605.13_7	0.119	0.0265391	SE
chr18	3129229	3129517	-	8098	MYOM1	ENSG00000101605.13_7	-0.135	0.0116695	SE
chr18	2544193	2544285	-	8132	METTL4	ENSG00000101574.15_7	0.023	0.0955041	SE
chr18	2544651	2544758	-	8133	METTL4	ENSG00000101574.15_7	0.024	0.0825223	SE
chr18	1273361	1273534	-	8150	LINC00470	ENSG00000132204.14_8	0.114	0.0380251	SE
chr18	1273361	1273534	-	8152	LINC00470	ENSG00000132204.14_8	0.145	0.0448395	SE
chr18	1278568	1278634	-	8163	LINC00470	ENSG00000132204.14_8	0.082	0.0847503	SE
chr18	1278568	1278634	-	8166	LINC00470	ENSG00000132204.14_8	0.127	0.000707709	SE
chr18	1278568	1278634	-	8167	LINC00470	ENSG00000132204.14_8	0.227	3.3838e-05	SE
chr18	1358726	1358895	-	8185	LINC00470	ENSG00000132204.14_8	0.056	0.0156146	SE
chr18	1358726	1358895	-	8191	LINC00470	ENSG00000132204.14_8	0.073	0.00163465	SE
chr18	1361143	1361222	-	8194	LINC00470	ENSG00000132204.14_8	0.131	0.00364932	SE
chr18	1361143	1361222	-	8198	LINC00470	ENSG00000132204.14_8	0.197	4.84349e-13	SE
chr18	1361143	1361222	-	8200	LINC00470	ENSG00000132204.14_8	0.046	0.0489383	SE
chr18	1361177	1361222	-	8201	LINC00470	ENSG00000132204.14_8	0.154	0.0373509	SE
chr18	1361177	1361222	-	8202	LINC00470	ENSG00000132204.14_8	0.271	1.02052e-12	SE
chr18	1361177	1361222	-	8203	LINC00470	ENSG00000132204.14_8	0.088	0.0864727	SE
chr18	1365917	1366187	-	8208	LINC00470	ENSG00000132204.14_8	0.175	0.0249862	SE
chr18	1365917	1366226	-	8213	LINC00470	ENSG00000132204.14_8	0.357	5.89433e-13	SE
chr18	678695	678737	-	8241	ENOSF1	ENSG00000132199.20_7	-0.042	0.0753891	SE
chr18	254272	254355	-	8272	THOC1	ENSG00000079134.12_7	-0.011	0.0732176	SE
chr17	80588796	80588898	-	8386	WDR45B	ENSG00000141580.16_7	-0.031	0.0579081	SE
chr17	80588796	80588898	-	8387	WDR45B	ENSG00000141580.16_7	-0.291	0.000425292	SE
chr17	79564270	79564342	-	8495	NPLOC4	ENSG00000182446.14_7	0.482	0.0369446	SE
chr17	78857580	78857772	+	8566	RPTOR	ENSG00000141564.15_6	-0.13	0.00565884	SE
chr17	78899169	78899280	+	8568	RPTOR	ENSG00000141564.15_6	0.072	7.54149e-05	SE
chr19	37957640	37957706	-	8571	ZNF569	ENSG00000196437.12_8	-0.22	0.0563835	SE
chr22	35516005	35516060	-	8673	LINC01399	ENSG00000233080.3_9	-0.335	0.00322133	SE
chr17	74679928	74680009	-	8683	MXRA7	ENSG00000182534.13_6	-0.041	0.00963354	SE
chr17	74622087	74622177	-	8685	ST6GALNAC1	ENSG00000070526.15_7	-0.031	0.0320367	SE
chr17	74086409	74086478	-	8721	EXOC7	ENSG00000182473.22_7	0.021	0.096446	SE
chr17	73887893	73887959	-	8750	TRIM65	ENSG00000141569.12_8	-0.067	0.00415688	SE
chr17	61495667	61495768	+	9079	TANC2	ENSG00000170921.15_6	-0.084	0.0133218	SE
chr17	60585768	60585914	+	9088	TLK2	ENSG00000146872.18_7	0.051	0.0954055	SE
chr17	58289384	58289459	-	9131	USP32	ENSG00000170832.13_7	-0.034	0.00193073	SE
chr17	58018196	58018304	+	9205	RPS6KB1	ENSG00000108443.14_6	-0.016	0.0571769	SE
chr17	57076741	57076820	-	9265	TRIM37	ENSG00000108395.14_9	0.062	0.0813919	SE
chr17	56604042	56604339	-	9283	SEPTIN4	ENSG00000108387.15_8	0.538	9.44052e-07	SE
chr17	56082774	56082961	-	9297	SRSF1	ENSG00000136450.13_8	-0.022	0	SE
chr17	55334826	55334908	+	9309	MSI2	ENSG00000153944.12_9	-0.038	0.00701051	SE
chr17	55335630	55335715	+	9310	MSI2	ENSG00000153944.12_9	-0.02	0.0455385	SE
chr17	55075745	55075859	+	9334	SCPEP1	ENSG00000121064.13_8	0.06	0.00103491	SE
chr17	54933872	54933986	+	9347	DGKE	ENSG00000153933.10_5	0.051	0.0607234	SE
chr17	52981068	52981153	+	9364	TOM1L1	ENSG00000141198.16_10	0.04	0.0352334	SE
chr17	49231585	49231805	+	9400	NME1	ENSG00000239672.8_8	-0.015	0.059292	SE
chr17	49109041	49109083	-	9422	SPAG9	ENSG00000008294.21_8	-0.099	0.00884319	SE
chr17	48560003	48560067	+	9447	RSAD1	ENSG00000136444.10_8	-0.016	0.0348729	SE
chr17	45008467	45008573	+	9611	GOSR2	ENSG00000108433.17_7	0.067	0.00806811	SE
chr17	45008470	45008573	+	9614	GOSR2	ENSG00000108433.17_7	0.15	0.000268941	SE
chr19	10919244	10919256	+	9645	DNM2	ENSG00000079805.17_7	0.136	0.00159991	SE
chr17	44051750	44051837	+	9658	MAPT	ENSG00000186868.16_5	0.139	0.00471784	SE
chr17	43214385	43214506	+	9686	ACBD4	ENSG00000181513.15_7	0.019	0.0655366	SE
chr17	42809545	42809633	+	9706	DBF4B	ENSG00000161692.18_5	0.217	5.79044e-07	SE
chr17	42818703	42818820	+	9710	DBF4B	ENSG00000161692.18_5	-0.071	0.0137773	SE
chr17	42387265	42387400	-	9721	RUNDC3A-AS1	ENSG00000267750.6_10	0.365	1.28243e-05	SE
chr17	42266778	42266956	+	9742	TMUB2	ENSG00000168591.16_7	-0.064	8.3666e-07	SE
chr17	41319750	41319866	-	9802	AC060780.1	ENSG00000267002.4_10	0.485	0.000394538	SE
chr17	41105740	41105795	-	9849	PTGES3L-AARSD1	ENSG00000108825.18_7	-0.057	0.0655327	SE
chr17	41106892	41106984	-	9850	PTGES3L-AARSD1	ENSG00000108825.18_7	0.026	0.0801924	SE
chr17	40738782	40738909	-	9898	RETREG3	ENSG00000141699.11_10	-0.034	0.0781785	SE
chr17	40739851	40739882	-	9899	RETREG3	ENSG00000141699.11_10	-0.17	0.00546558	SE
chr17	40714373	40714505	+	9901	COASY	ENSG00000068120.15_9	-0.12	5.45259e-10	SE
chr17	40155376	40155575	-	9955	DNAJC7	ENSG00000168259.17_9	0.085	0.0246022	SE
chr17	38065210	38065295	-	10042	GSDMB	ENSG00000073605.18_7	0.112	0.0558951	SE
chr17	37814961	37815073	+	10064	STARD3	ENSG00000131748.16_9	-0.031	0.0674162	SE
chr17	37814974	37815073	+	10065	STARD3	ENSG00000131748.16_9	-0.019	0.02851	SE
chr17	34956099	34956192	+	10168	DHRS11	ENSG00000278535.5_7	0.049	1.53165e-05	SE
chr17	33997875	33997917	+	10214	AP2B1	ENSG00000006125.18_9	-0.089	0.00144805	SE
chr17	30688486	30688534	+	10257	ZNF207	ENSG00000010244.18_8	-0.02	2.66982e-05	SE
chr17	30693683	30693776	+	10264	ZNF207	ENSG00000010244.18_8	0.127	4.38842e-06	SE
chrX	141470837	141470911	+	10301	AL031073.2	ENSG00000288098.1_1	-0.369	0.00480627	SE
chr17	29206440	29206505	+	10309	ATAD5	ENSG00000176208.9_5	-0.069	0.00399342	SE
chr17	28817143	28817235	+	10345	GOSR1	ENSG00000108587.16_5	-0.024	0.00704789	SE
chr17	28445097	28445191	+	10354	NSRP1	ENSG00000126653.18_8	-0.08	0.00175341	SE
chr17	26902982	26903038	-	10434	ALDOC	ENSG00000109107.14_8	-0.037	0.0460841	SE
chr17	25877593	25877734	+	10468	KSR1	ENSG00000141068.14_9	-0.029	0.0788394	SE
chr17	21199397	21199522	+	10510	MAP2K3	ENSG00000034152.19_8	0.089	0.0864814	SE
chr17	20795542	20795745	+	10526	CCDC144NL-AS1	ENSG00000233098.9_10	-0.04	0.00752647	SE
chr17	17965158	17965289	+	10618	GID4	ENSG00000141034.10_6	0.037	0.0121688	SE
chr17	17127235	17127457	-	10627	FLCN	ENSG00000154803.13_8	-0.034	0.000269114	SE
chr17	10596173	10596278	-	10794	SCO1	ENSG00000133028.12_7	0.027	0.0403387	SE
chr17	8113494	8113567	-	10838	AURKB	ENSG00000178999.13_8	0.049	0.0269326	SE
chr17	7490009	7490095	+	10870	MPDU1	ENSG00000129255.16_6	-0.228	0.0304171	SE
chr17	6515238	6515468	-	10997	KIAA0753	ENSG00000198920.11_10	-0.074	0.0182718	SE
chr17	4200011	4200109	-	11121	UBE2G1	ENSG00000132388.12_5	-0.025	0.0136011	SE
chr17	3831520	3831621	-	11134	ATP2A3	ENSG00000074370.18_7	-0.079	0	SE
chr17	3831520	3831621	-	11135	ATP2A3	ENSG00000074370.18_7	-0.225	5.41681e-07	SE
chr17	3831533	3831621	-	11136	ATP2A3	ENSG00000074370.18_7	-0.094	0	SE
chr17	3831533	3831621	-	11137	ATP2A3	ENSG00000074370.18_7	-0.199	4.72826e-06	SE
chr17	3592785	3592921	-	11154	P2RX5	ENSG00000083454.22_9	0.183	0.0411702	SE
chr17	3592785	3592924	-	11155	P2RX5	ENSG00000083454.22_9	0.11	0.0530613	SE
chr17	3543481	3543561	+	11158	CTNS	ENSG00000040531.16_7	-0.048	0.069135	SE
chr16	90260528	90260633	+	11297	LINC02193	ENSG00000260923.7_9	-0.028	1.07199e-08	SE
chr16	90102040	90102095	+	11302	GAS8	ENSG00000141013.17_6	0.089	7.52581e-05	SE
chr16	90015824	90015921	+	11309	DEF8	ENSG00000140995.16_8	0.283	0.000109286	SE
chr16	90016474	90016714	+	11312	DEF8	ENSG00000140995.16_8	-0.074	0.00708965	SE
chr16	90016474	90016736	+	11313	DEF8	ENSG00000140995.16_8	-0.067	0.0323593	SE
chr16	89972601	89972692	+	11335	TCF25	ENSG00000141002.20_7	0.271	0.00195702	SE
chr16	89720311	89720331	-	11375	CHMP1A	ENSG00000131165.16_6	0.036	0.00710727	SE
chr16	89720311	89720428	-	11376	CHMP1A	ENSG00000131165.16_6	0.136	0.0258394	SE
chr19	39412641	39412718	-	11382	SARS2	ENSG00000104835.15_6	0.408	0.00014511	SE
chr16	81091509	81091669	-	11553	AC092718.3	ENSG00000260643.2_9	-0.279	0.0151019	SE
chr16	81099797	81099886	-	11566	C16orf46	ENSG00000166455.14_7	0.742	6.11535e-06	SE
chr16	81015410	81015482	-	11576	CMC2	ENSG00000103121.9_6	-0.03	0.00863957	SE
chr16	81015410	81015482	-	11578	CMC2	ENSG00000103121.9_6	-0.045	3.66015e-05	SE
chr16	74698521	74698643	-	11637	RFWD3	ENSG00000168411.14_7	0.082	0.0671206	SE
chr16	71957190	71957283	+	11724	IST1	ENSG00000182149.21_9	-0.019	1.45922e-05	SE
chr16	71958671	71958720	+	11725	IST1	ENSG00000182149.21_9	-0.036	1.22667e-06	SE
chr16	71958675	71958720	+	11727	IST1	ENSG00000182149.21_9	-0.042	9.13693e-07	SE
chr16	70164325	70164447	+	11823	PDPR	ENSG00000090857.14_6	0.086	0.0238383	SE
chr16	70165204	70165322	+	11824	PDPR	ENSG00000090857.14_6	0.111	0.0225496	SE
chr16	70177412	70177561	+	11828	PDPR	ENSG00000090857.14_6	0.037	0.00803288	SE
chr16	68324298	68324443	+	11877	SLC7A6	ENSG00000103064.15_7	0.066	0.0116372	SE
chr16	67866130	67866218	-	11939	CENPT	ENSG00000102901.13_7	0.019	0.00186714	SE
chr16	67288923	67289087	+	11973	SLC9A5	ENSG00000135740.17_8	0.102	0.0388255	SE
chr16	67159861	67159945	+	11995	C16orf70	ENSG00000125149.12_8	-0.044	0.039478	SE
chr20	49492533	49492630	+	12015	BCAS4	ENSG00000124243.17_8	-0.146	0.0578426	SE
chr16	66997704	66997838	+	12017	CES3	ENSG00000172828.13_7	-0.07	0.00645063	SE
chr16	58208354	58208414	-	12126	CSNK2A2	ENSG00000070770.9_7	-0.21	0.0158328	SE
chr16	58220658	58220760	-	12136	CSNK2A2	ENSG00000070770.9_7	-0.013	0.0504551	SE
chr16	54954209	54954239	-	12300	CRNDE	ENSG00000245694.10_7	-0.055	1.31178e-13	SE
chr16	54954209	54954250	-	12301	CRNDE	ENSG00000245694.10_7	-0.104	3.61625e-12	SE
chr16	54954209	54954322	-	12302	CRNDE	ENSG00000245694.10_7	-0.02	0.0093268	SE
chr16	32781007	32781200	+	12415	HERC2P5	ENSG00000260644.6_5	0.498	0.00116506	SE
chr20	40179943	40179999	-	12497	CHD6	ENSG00000124177.15_7	-0.283	0.0616938	SE
chr16	31104103	31104185	-	12505	VKORC1	ENSG00000167397.15_7	0.022	0.00385957	SE
chr16	30672624	30672654	+	12541	FBRS	ENSG00000156860.16_10	0.035	0.000226516	SE
chr17	61905033	61905283	+	12544	PSMC5	ENSG00000087191.13_8	-0.026	0.00282263	SE
chr16	30593044	30593469	+	12552	AC002310.2	ENSG00000239791.2_9	-0.165	0.000193284	SE
chr16	30078205	30078359	+	12602	AC093512.2	ENSG00000285043.1_4	-0.012	0.0117076	SE
chr16	29873906	29874041	-	12618	CDIPT	ENSG00000103502.14_6	0.021	0.0784467	SE
chr16	29815318	29815428	+	12625	KIF22	ENSG00000079616.13_4	-0.17	0.0170244	SE
chr16	28967471	28967658	+	12657	NFATC2IP	ENSG00000176953.12_6	-0.039	0.000342791	SE
chr16	27300120	27300274	+	12789	NSMCE1-DT	ENSG00000245888.7_9	-0.106	0.0501741	SE
chr16	23491965	23492091	-	12901	GGA2	ENSG00000103365.15_9	0.022	0.000525061	SE
chr16	22462940	22462979	+	12912	SMG1P1	ENSG00000237296.9_6	0.352	0.0332941	SE
chr16	20817036	20817267	-	12977	ERI2	ENSG00000196678.14_8	-0.09	0.0135156	SE
chr16	19775169	19775222	+	13019	IQCK	ENSG00000174628.16_6	-0.135	0.00329166	SE
chr16	17231372	17231471	+	13068	AC109446.3	ENSG00000261448.1_6	0.136	0.0176313	SE
chr19	43023099	43023387	-	13189	CEACAM1	ENSG00000079385.22_8	0.082	0.0977595	SE
chr16	14743660	14743830	+	13225	BFAR	ENSG00000103429.11_5	-0.021	0.0565644	SE
chr16	11785145	11785938	-	13291	TXNDC11	ENSG00000153066.12_6	-0.016	0.0843347	SE
chr16	11027700	11027861	-	13328	DEXI	ENSG00000182108.11_9	-0.046	0.0670639	SE
chr16	5141794	5141896	-	13389	EEF2KMT	ENSG00000118894.15_7	-0.094	0.0198887	SE
chr16	4552744	4552960	+	13429	HMOX2	ENSG00000103415.12_7	-0.014	0.0827537	SE
chr17	72240115	72240188	+	13447	TTYH2	ENSG00000141540.11_5	-0.039	0.0278168	SE
chr17	72240115	72240188	+	13448	TTYH2	ENSG00000141540.11_5	-0.094	0.00303962	SE
chr16	4301322	4302035	-	13470	LINC01569	ENSG00000262468.6_8	-0.073	0.0244351	SE
chr16	3363048	3363175	+	13523	ZNF75A	ENSG00000162086.16_6	0.054	0.0978707	SE
chr19	21724565	21724688	+	13571	ZNF429	ENSG00000197013.10_9	-0.339	0.0275377	SE
chr16	2825451	2825557	-	13575	ELOB	ENSG00000103363.15_5	0.015	0.00998492	SE
chr16	2627425	2627501	+	13591	PDPK1	ENSG00000140992.19_7	0.537	8.07983e-05	SE
chr16	2577561	2577616	+	13597	AC093525.1	ENSG00000259784.1_8	-0.024	0.0779206	SE
chrX	19398237	19398395	-	13628	MAP3K15	ENSG00000180815.14_5	-0.099	0.0651061	SE
chr16	2132436	2132505	+	13658	TSC2	ENSG00000103197.18_7	0.182	0.0659628	SE
chr16	1907735	1907931	-	13715	MEIOB	ENSG00000162039.16_7	0.029	9.35035e-06	SE
chr16	1515267	1515339	-	13738	CLCN7	ENSG00000103249.18_7	0.026	0.00753769	SE
chr16	1362347	1362604	+	13752	UBE2I	ENSG00000103275.20_6	-0.219	0.000846249	SE
chr16	1362347	1362604	+	13753	UBE2I	ENSG00000103275.20_6	-0.05	0.0344936	SE
chr15	101905203	101905249	-	13835	PCSK6	ENSG00000140479.17_7	0.169	0.0892995	SE
chr15	101605565	101605869	-	13868	AC090907.2	ENSG00000259755.1_8	0.593	0.000169924	SE
chr15	100271922	100272212	-	13879	LYSMD4	ENSG00000183060.15_7	-0.143	0.0254759	SE
chr22	37457578	37457669	+	13899	KCTD17	ENSG00000100379.17_7	0.245	0.00362192	SE
chr15	98296138	98296280	-	13919	LINC00923	ENSG00000251209.9_8	0.051	0.0694354	SE
chr18	75691450	75691593	-	13947	LINC01029	ENSG00000265843.3_10	-0.114	0.0191296	SE
chr18	75694475	75694669	-	13948	LINC01029	ENSG00000265843.3_10	-0.075	0.0140474	SE
chr15	93444396	93444529	+	13968	CHD2	ENSG00000173575.22_8	-0.027	0.0774979	SE
chr15	91524728	91524899	-	13995	AC068831.6	ENSG00000284946.1_4	-0.009	0.0675577	SE
chr15	91512308	91512350	-	14008	PRC1	ENSG00000198901.14_8	0.101	0.00179735	SE
chr15	91512308	91512350	-	14009	PRC1	ENSG00000198901.14_8	0.097	0.045239	SE
chr15	91434211	91434421	+	14026	FES	ENSG00000182511.12_6	-0.147	0.0713637	SE
chr15	91303376	91303509	+	14036	BLM	ENSG00000197299.12_6	-0.032	0.000938662	SE
chr15	90421496	90421532	-	14070	AP3S2	ENSG00000157823.17_7	-0.027	0.0965987	SE
chr15	89931714	89931812	+	14092	MIR9-3HG	ENSG00000255571.9_8	0.145	0.0228057	SE
chr15	89931731	89931812	+	14093	MIR9-3HG	ENSG00000255571.9_8	0.107	0.07323	SE
chr15	89931734	89931812	+	14094	MIR9-3HG	ENSG00000255571.9_8	0.117	0.0431001	SE
chr15	89788986	89789070	+	14110	FANCI	ENSG00000140525.19_8	-0.161	0.0200151	SE
chr15	89788986	89789070	+	14112	FANCI	ENSG00000140525.19_8	-0.151	0.0492836	SE
chr15	89442886	89443042	-	14143	MFGE8	ENSG00000140545.15_7	0.074	0	SE
chr22	40744400	40744650	+	14155	AL022238.3	ENSG00000284431.1_6	0.034	3.0591e-10	SE
chr22	40760883	40761060	+	14158	ADSL	ENSG00000239900.13_6	0.01	0.0682223	SE
chr19	50000837	50000852	+	14175	RPS11	ENSG00000142534.7_6	-0.089	0.0994357	SE
chr15	85307937	85308046	+	14190	ZNF592	ENSG00000166716.10_6	-0.094	0.00702185	SE
chr15	83718824	83718930	-	14286	BTBD1	ENSG00000064726.10_8	-0.024	8.14285e-05	SE
chr20	50921493	50921530	+	14338	LINC01524	ENSG00000234948.2_9	-0.329	0.0800036	SE
chr16	74340152	74340319	-	14405	AC009120.2	ENSG00000259972.3_10	0.192	0.00319719	SE
chr17	3370719	3370848	-	14472	SPATA22	ENSG00000141255.13_8	0.135	0.00377428	SE
chr17	3370767	3370848	-	14473	SPATA22	ENSG00000141255.13_8	0.283	0.000261137	SE
chr15	76152218	76152323	+	14532	UBE2Q2	ENSG00000140367.12_7	0.044	0.0111492	SE
chr15	76168527	76168612	+	14541	UBE2Q2	ENSG00000140367.12_7	-0.025	0.0393264	SE
chr15	76175706	76175765	+	14555	UBE2Q2	ENSG00000140367.12_7	-0.266	0.000881106	SE
chr15	76183259	76183355	+	14559	UBE2Q2	ENSG00000140367.12_7	-0.212	0.0658695	SE
chr21	40551849	40551912	-	14565	PSMG1	ENSG00000183527.12_6	-0.023	0.0508027	SE
chr15	75917055	75917276	-	14585	SNUPN	ENSG00000169371.14_7	-0.289	0.0475563	SE
chr15	75889680	75889821	-	14586	AC105036.3	ENSG00000260269.5_9	0.478	0.00492322	SE
chr15	73048591	73048788	-	14698	ADPGK	ENSG00000159322.17_5	-0.037	0.0589225	SE
chr15	72494794	72494961	-	14760	PKM	ENSG00000067225.18_8	-0.024	1.63972e-06	SE
chr15	72495362	72495529	-	14763	PKM	ENSG00000067225.18_8	0.018	1.37586e-06	SE
chr15	68491878	68492019	-	14807	CALML4	ENSG00000129007.14_6	-0.158	0.0160547	SE
chr15	66172062	66172089	+	14921	RAB11A	ENSG00000103769.10_6	-0.018	0.00385512	SE
chr15	65944007	65944097	+	14930	SLC24A1	ENSG00000074621.14_7	-0.086	0.0283941	SE
chr15	65944979	65945146	+	14931	SLC24A1	ENSG00000074621.14_7	-0.064	0.0658695	SE
chr15	65316009	65316132	-	14966	MTFMT	ENSG00000103707.10_7	-0.024	0.0257122	SE
chr15	63353396	63353472	+	15067	TPM1	ENSG00000140416.23_10	0.044	0.0864603	SE
chr19	58823562	58823828	+	15075	ERVK3-1	ENSG00000142396.10_7	-0.01	0.0263862	SE
chr17	74554051	74554361	+	15101	SNHG16	ENSG00000163597.15_5	0.092	0.0393264	SE
chr19	10799225	10799354	+	15128	ILF3	ENSG00000129351.17_7	0.018	0.000435896	SE
chr19	1270865	1271035	+	15195	CIRBP	ENSG00000099622.14_9	0.023	0.0123965	SE
chr15	50906319	50906460	-	15335	TRPM7	ENSG00000092439.16_11	-0.025	0.0835172	SE
chr15	50776471	50776558	+	15355	USP8	ENSG00000138592.14_9	-0.085	0.0695138	SE
chr15	43478017	43478077	+	15524	CCNDBP1	ENSG00000166946.14_6	0.101	0.012246	SE
chr15	42820459	42820618	+	15596	SNAP23	ENSG00000092531.10_6	0.014	0.000364847	SE
chr15	42564260	42564321	-	15611	TMEM87A	ENSG00000103978.16_7	0.039	0.00228292	SE
chr21	38782871	38782972	+	15619	DYRK1A	ENSG00000157540.22_8	-0.058	0.0317034	SE
chr21	38782871	38782972	+	15620	DYRK1A	ENSG00000157540.22_8	-0.6	0.000135281	SE
chr15	41549107	41549188	+	15660	CHP1	ENSG00000187446.12_5	-0.119	0.0128703	SE
chr15	41146257	41146284	+	15668	SPINT1	ENSG00000166145.14_5	0.129	0.00983202	SE
chr15	41104896	41105100	+	15685	ZFYVE19	ENSG00000166140.17_5	-0.097	4.39195e-12	SE
chr15	40556643	40556729	+	15733	BUB1B-PAK6	ENSG00000259288.7_10	0.086	0.00802433	SE
chr15	40396380	40396541	-	15734	BMF	ENSG00000104081.14_7	-0.088	0.00995726	SE
chr15	40396443	40396541	-	15735	BMF	ENSG00000104081.14_7	-0.129	0.088122	SE
chr15	40339062	40339422	+	15745	SRP14-AS1	ENSG00000248508.8_8	-0.243	0.014913	SE
chr15	40348653	40348842	+	15751	SRP14-AS1	ENSG00000248508.8_8	0.243	0.0226484	SE
chr15	40348653	40348842	+	15752	SRP14-AS1	ENSG00000248508.8_8	0.276	0.00082914	SE
chr17	25970550	25970646	+	15787	LGALS9	ENSG00000168961.17_10	-0.307	0.0186488	SE
chr17	25972339	25972375	+	15788	LGALS9	ENSG00000168961.17_10	-0.189	0.0416436	SE
chr15	29140665	29140755	+	15913	APBA2	ENSG00000034053.14_9	-0.055	0.0266267	SE
chr15	28235721	28235793	-	15933	OCA2	ENSG00000104044.16_8	0.688	1.85786e-05	SE
chr14	103800725	103800934	+	16220	EIF5	ENSG00000100664.11_6	0.018	0.0567727	SE
chr14	100847246	100848083	+	16318	WDR25	ENSG00000176473.13_5	-0.03	0.0156325	SE
chr14	100841619	100841687	-	16342	WARS1	ENSG00000140105.18_8	0.05	0.031222	SE
chr14	97026985	97027048	+	16422	PAPOLA	ENSG00000090060.18_7	0.02	0.0407918	SE
chr18	59737622	59737739	-	16448	PIGN	ENSG00000197563.11_8	0.413	0.00664001	SE
chr14	94563837	94564024	+	16486	IFI27L1	ENSG00000165948.11_7	0.088	3.20481e-05	SE
chr14	94567084	94567117	+	16488	IFI27L1	ENSG00000165948.11_7	0.023	0.0088858	SE
chr14	92585192	92585310	-	16559	NDUFB1	ENSG00000183648.11_7	0.144	0.0258372	SE
chr14	89341369	89341453	+	16693	TTC8	ENSG00000165533.19_8	-0.065	0.0804245	SE
chr14	88411896	88412077	-	16725	GALC	ENSG00000054983.17_8	0.018	0.0421323	SE
chr14	77923437	77923708	-	16789	VIPAS39	ENSG00000151445.16_10	-0.063	0.0137388	SE
chr14	77788889	77789075	+	16791	GSTZ1	ENSG00000100577.19_6	0.051	0.0129993	SE
chr20	25397739	25397838	+	16813	GINS1	ENSG00000101003.10_5	-0.193	0.0637586	SE
chr14	76647106	76647192	+	16835	GPATCH2L	ENSG00000089916.18_8	0.019	0.0882302	SE
chr14	75530172	75530264	-	16855	ACYP1	ENSG00000119640.9_6	-0.018	0.0252586	SE
chr14	75349293	75349327	+	16864	DLST	ENSG00000119689.15_7	0.23	0	SE
chr14	75349293	75349327	+	16865	DLST	ENSG00000119689.15_7	0.287	0.00832211	SE
chr14	75352288	75352337	+	16866	DLST	ENSG00000119689.15_7	0.077	2.39899e-05	SE
chr14	75352288	75352337	+	16867	DLST	ENSG00000119689.15_7	0.095	0.0253475	SE
chr14	75352288	75352337	+	16868	DLST	ENSG00000119689.15_7	0.06	8.14443e-13	SE
chr14	75181574	75181646	+	16897	FCF1	ENSG00000119616.11_5	-0.013	0.0750547	SE
chr14	74361061	74361112	+	16948	ZNF410	ENSG00000119725.20_6	0.249	0.0397999	SE
chr14	74391404	74391522	+	16961	ZNF410	ENSG00000119725.20_6	-0.021	0.0441693	SE
chr14	56139889	56139973	+	17002	KTN1	ENSG00000126777.18_8	-0.077	0.038732	SE
chr6	64356431	64356700	+	17004	PHF3	ENSG00000118482.12_6	0.067	0.093539	SE
chr6	64394029	64395812	+	17016	PHF3	ENSG00000118482.12_6	0.017	0.0340709	SE
chr7	138936701	138936803	+	17049	UBN2	ENSG00000157741.15_5	0.048	0.0114973	SE
chr3	10106039	10106113	+	17081	FANCD2	ENSG00000144554.11_4	0.134	0.00112695	SE
chr3	10108892	10109001	+	17082	FANCD2	ENSG00000144554.11_4	0.015	0.0462991	SE
chr12	110019199	110019355	+	17101	MVK	ENSG00000110921.14_8	0.071	0.0150189	SE
chr12	30872012	30872159	-	17223	CAPRIN2	ENSG00000110888.17_8	0.055	0.0823802	SE
chr12	30873744	30873849	-	17225	CAPRIN2	ENSG00000110888.17_8	0.229	0.00145201	SE
chr12	30873744	30873849	-	17226	CAPRIN2	ENSG00000110888.17_8	0.273	0.000254158	SE
chr2	37425636	37425815	+	17251	CEBPZOS	ENSG00000218739.10_6	-0.124	3.33202e-12	SE
chr17	38984308	38984548	+	17320	TMEM99	ENSG00000167920.10_10	0.104	0.0322324	SE
chr17	34901467	34901666	+	17325	GGNBP2	ENSG00000278311.5_7	0.024	0.0825294	SE
chr6	41048549	41048636	+	17333	NFYA	ENSG00000001167.14_3	-0.094	0.0115502	SE
chr13	73354983	73355141	-	17366	DIS3	ENSG00000083520.15_6	-0.153	5.76521e-05	SE
chr19	35749847	35749967	+	17371	LSR	ENSG00000105699.16_7	0.017	0.0308718	SE
chr19	35753448	35753595	+	17374	LSR	ENSG00000105699.16_7	0.064	0.00112371	SE
chr19	35753448	35753595	+	17375	LSR	ENSG00000105699.16_7	0.074	0.0853882	SE
chr3	9859328	9859443	+	17391	TTLL3	ENSG00000214021.16_7	0.099	0.00396127	SE
chr3	9860505	9860604	+	17392	TTLL3	ENSG00000214021.16_7	0.142	0.00691353	SE
chr3	9874787	9874929	+	17400	TTLL3	ENSG00000214021.16_7	0.213	0.0408529	SE
chr6	38882976	38883153	+	17439	DNAH8	ENSG00000124721.18_9	0.141	0.069921	SE
chr6	37419581	37419653	+	17453	CMTR1	ENSG00000137200.13_5	-0.507	0.0346022	SE
chr6	37429324	37429421	+	17460	CMTR1	ENSG00000137200.13_5	0.393	0.000785432	SE
chr7	24902818	24902911	-	17579	OSBPL3	ENSG00000070882.13_9	0.111	0.0624105	SE
chr9	116018393	116018557	+	17586	SLC31A1	ENSG00000136868.11_5	0.01	0.0781044	SE
chr22	49834524	49834861	-	17690	C22orf34	ENSG00000188511.12_7	-0.186	0.000247259	SE
chr15	102512785	102512897	+	17736	WASH3P	ENSG00000185596.16_4	-0.118	3.7167e-13	SE
chr15	102512798	102512897	+	17738	WASH3P	ENSG00000185596.16_4	-0.272	0	SE
chr19	6452322	6452490	-	17741	SLC25A23	ENSG00000125648.15_7	-0.07	0.00401989	SE
chr6	32016139	32016427	-	17747	TNXB	ENSG00000168477.19_11	-0.071	0.0994194	SE
chr6	32039766	32040075	-	17752	TNXB	ENSG00000168477.19_11	-0.061	0.0128155	SE
chr6	31688729	31688840	-	17778	LY6G6C	ENSG00000204421.3_6	0.774	5.27902e-05	SE
chr6	30853401	30853457	+	17867	DDR1	ENSG00000204580.13_5	-0.143	0.000874336	SE
chr22	39024242	39024347	-	17875	FAM227A	ENSG00000184949.16_9	0.261	0.000425874	SE
chr6	30138752	30138785	+	17925	TRIM15	ENSG00000204610.13_6	0.121	0.00834425	SE
chr15	66643862	66643938	-	17939	TIPIN	ENSG00000075131.10_9	-0.026	0.007407	SE
chr15	66643862	66643938	-	17940	TIPIN	ENSG00000075131.10_9	-0.026	0.0627802	SE
chr5	64951462	64951480	+	17971	TRAPPC13	ENSG00000113597.18_7	0.095	0.0263272	SE
chr1	87333735	87333785	-	17999	SELENOF	ENSG00000183291.17_11	0.012	0.0604768	SE
chr21	34954470	34954552	-	18060	DONSON	ENSG00000159147.18_10	0.1	4.6596e-07	SE
chr21	34955793	34955972	-	18062	DONSON	ENSG00000159147.18_10	0.084	1.10443e-07	SE
chr1	44697911	44698060	-	18098	ERI3	ENSG00000117419.16_8	-0.207	0.049774	SE
chr1	44818521	44818597	-	18116	ERI3	ENSG00000117419.16_8	0.027	0.00438738	SE
chr6	30172432	30172542	-	18121	TRIM26	ENSG00000234127.9_10	0.202	0.0854766	SE
chr6	26856788	26856976	-	18123	GUSBP2	ENSG00000241549.8_5	0.102	0.00211106	SE
chr4	10456428	10456612	-	18126	ZNF518B	ENSG00000178163.8_7	-0.074	0.0740427	SE
chr6	29713249	29713504	-	18140	HLA-F-AS1	ENSG00000214922.9_8	-0.168	0.0971373	SE
chr6	29713249	29713504	-	18144	HLA-F-AS1	ENSG00000214922.9_8	-0.189	0.025646	SE
chr6	29714924	29715202	-	18146	HLA-F-AS1	ENSG00000214922.9_8	0.343	1.21379e-05	SE
chr6	26443868	26443887	+	18152	BTN3A3	ENSG00000111801.16_7	-0.256	0.00591075	SE
chr1	100472589	100472712	+	18161	SLC35A3	ENSG00000117620.15_9	0.034	0.0268951	SE
chr8	125959784	125960034	+	18188	LINC00964	ENSG00000249816.7_9	0.516	0.0234787	SE
chr4	89658622	89658706	-	18274	FAM13A	ENSG00000138640.15_9	-0.095	4.19205e-05	SE
chr4	89711736	89711778	-	18286	FAM13A	ENSG00000138640.15_9	-0.052	0.0840426	SE
chr12	128264407	128264478	-	18305	AC087894.3	ENSG00000286662.2_3	-0.198	0.0322633	SE
chr7	30477188	30477272	-	18308	NOD1	ENSG00000106100.11_8	0.155	0.048089	SE
chr6	14997646	14997706	-	18329	AL138720.1	ENSG00000234261.4_10	-0.122	0.0885799	SE
chr6	15053261	15053417	-	18331	AL138720.1	ENSG00000234261.4_10	-0.136	0.0604746	SE
chr6	10902909	10902995	+	18415	SYCP2L	ENSG00000153157.13_8	-0.044	0.067872	SE
chr6	10906252	10906287	+	18420	SYCP2L	ENSG00000153157.13_8	-0.184	0.000671443	SE
chr6	10942691	10942762	+	18442	SYCP2L	ENSG00000153157.13_8	0.064	0.0044649	SE
chr21	43243673	43243805	-	18469	PRDM15	ENSG00000141956.14_6	-0.044	0.0408284	SE
chr6	8419812	8419910	-	18478	SLC35B3	ENSG00000124786.11_7	-0.036	0.075488	SE
chr6	8419812	8419910	-	18479	SLC35B3	ENSG00000124786.11_7	-0.033	0.0544078	SE
chr2	28954531	28954603	-	18485	AC092164.1	ENSG00000226833.6_9	-0.276	0.0455242	SE
chr6	7886193	7886276	-	18492	TXNDC5	ENSG00000239264.9_7	-0.641	2.59033e-06	SE
chr6	7889727	7889814	-	18495	TXNDC5	ENSG00000239264.9_7	-0.587	2.17464e-05	SE
chr17	62007433	62007745	-	18592	CD79B	ENSG00000007312.13_7	0.129	0.0273545	SE
chr5	180743290	180743498	+	18622	AC138035.1	ENSG00000238035.8_7	-0.269	0.0897797	SE
chr13	28015153	28015214	-	18669	MTIF3	ENSG00000122033.14_5	0.232	0.00544676	SE
chr12	4627223	4627421	-	18707	C12orf4	ENSG00000047621.12_7	-0.12	0.015181	SE
chr1	17752036	17752180	-	18725	RCC2	ENSG00000179051.14_7	0.007	0.0942485	SE
chr5	177047473	177047507	-	18730	AC139795.1	ENSG00000246596.7_8	0.461	0.035984	SE
chr5	176899119	176899398	-	18736	DBN1	ENSG00000113758.13_9	0.286	0.0687543	SE
chr7	156236942	156238520	-	18785	LINC01006	ENSG00000182648.13_9	0.343	0.00497248	SE
chr5	170819917	170819982	+	18883	NPM1	ENSG00000181163.13_5	0.094	0.0470545	SE
chr5	169759851	169759941	+	18905	LINC01366	ENSG00000235172.8_8	0.036	0.076256	SE
chr7	158444984	158445172	-	18985	NCAPG2	ENSG00000146918.20_7	0.027	9.02e-06	SE
chr5	137281916	137282000	-	19046	FAM13B	ENSG00000031003.10_6	0.118	0.0178955	SE
chr8	26197418	26197489	+	19080	PPP2R2A	ENSG00000221914.11_9	0.026	0.0780499	SE
chr1	788050	788146	+	19109	LINC01128	ENSG00000228794.10_8	-0.092	0.0257641	SE
chr5	154210360	154210482	-	19144	FAXDC2	ENSG00000170271.11_9	0.062	1.08552e-09	SE
chr5	179922420	179922588	+	19170	CNOT6	ENSG00000113300.13_6	0.093	0.0177043	SE
chr6	34847402	34847513	-	19222	TAF11	ENSG00000064995.18_7	-0.019	0.00661041	SE
chr9	108296773	108296874	+	19235	FSD1L	ENSG00000106701.13_7	0.224	0.0144981	SE
chr9	108301543	108301632	+	19239	FSD1L	ENSG00000106701.13_7	0.158	0.00473596	SE
chr3	15455527	15455669	-	19305	METTL6	ENSG00000206562.12_7	-0.064	0.0691027	SE
chr3	15457004	15457090	-	19311	METTL6	ENSG00000206562.12_7	0.188	1.9771e-05	SE
chr2	113243493	113243572	+	19323	TTL	ENSG00000114999.8_5	-0.083	0.00237047	SE
chr6	161519309	161519459	+	19356	MAP3K4	ENSG00000085511.20_6	-0.052	0.0500491	SE
chr22	38254685	38254747	+	19497	EIF3L	ENSG00000100129.18_9	-0.098	0.069801	SE
chr5	138532129	138532217	-	19565	SIL1	ENSG00000120725.13_8	-0.07	0.0425152	SE
chr5	137721710	137722310	+	19591	KDM3B	ENSG00000120733.14_5	-0.021	0.000110339	SE
chr1	93621592	93621641	-	19603	TMED5	ENSG00000117500.13_6	-0.024	1.1194e-06	SE
chr12	122991380	122991470	-	19682	RSRC2	ENSG00000111011.18_6	-0.017	0.0206188	SE
chr5	134182352	134182553	+	19690	C5orf24	ENSG00000181904.9_6	-0.05	0.0452043	SE
chr5	133647982	133648071	-	19725	CDKL3	ENSG00000006837.12_8	0.167	0.039338	SE
chr5	133655048	133655188	-	19727	CDKL3	ENSG00000006837.12_8	0.139	0.00972118	SE
chr5	132559881	132559908	-	19796	FSTL4	ENSG00000053108.17_7	-0.261	0.00843516	SE
chr19	44847405	44847454	-	19878	ZNF112	ENSG00000062370.16_9	-0.341	0.000530461	SE
chr5	131054678	131054753	-	19920	FNIP1	ENSG00000217128.12_6	-0.021	0.0883522	SE
chr5	130897670	130897740	-	19932	RAPGEF6	ENSG00000158987.22_10	-0.056	0.0394947	SE
chr3	50148111	50148203	+	19967	RBM5	ENSG00000003756.17_9	-0.028	0.0510928	SE
chr5	122941032	122941056	+	20032	CSNK1G3	ENSG00000151292.17_6	-0.144	0.0903419	SE
chr12	4654947	4654998	+	20051	RAD51AP1	ENSG00000111247.14_4	-0.149	5.04911e-12	SE
chr12	4655474	4655584	+	20052	RAD51AP1	ENSG00000111247.14_4	-0.015	0.0441925	SE
chr10	18828122	18828228	-	20091	AL450384.2	ENSG00000240291.1_9	-0.206	0.00544959	SE
chr1	62160368	62160442	-	20379	TM2D1	ENSG00000162604.12_10	-0.02	0.00342352	SE
chr5	87578573	87578683	+	20483	TMEM161B-AS1	ENSG00000247828.8_9	0.13	0.0311005	SE
chr5	87578573	87578683	+	20484	TMEM161B-AS1	ENSG00000247828.8_9	0.224	0.0900268	SE
chr5	87581560	87581668	+	20507	TMEM161B-AS1	ENSG00000247828.8_9	0.119	0.0356832	SE
chr5	87583252	87583439	+	20521	TMEM161B-AS1	ENSG00000247828.8_9	0.046	0.00824918	SE
chr5	86700660	86700824	-	20576	CCNH	ENSG00000134480.16_7	0.019	4.4529e-05	SE
chr3	44492805	44492974	-	20699	ZNF445	ENSG00000185219.17_6	0.096	0.00107204	SE
chr3	44499735	44499856	-	20700	ZNF445	ENSG00000185219.17_6	-0.053	0.0166343	SE
chr19	29101166	29101238	+	20728	AC079466.1	ENSG00000266976.3_7	0.024	5.64514e-10	SE
chr19	29101166	29101238	+	20730	AC079466.1	ENSG00000266976.3_7	-0.133	0	SE
chr19	29101875	29102097	+	20733	AC079466.1	ENSG00000266976.3_7	-0.076	0	SE
chr19	29101888	29102097	+	20737	AC079466.1	ENSG00000266976.3_7	-0.079	0	SE
chr19	29101888	29103061	+	20740	AC079466.1	ENSG00000266976.3_7	-0.033	3.30108e-09	SE
chr19	29102818	29102968	+	20742	AC079466.1	ENSG00000266976.3_7	-0.019	0.00556011	SE
chr19	29102818	29102968	+	20743	AC079466.1	ENSG00000266976.3_7	-0.024	6.86346e-06	SE
chr19	29102818	29103061	+	20744	AC079466.1	ENSG00000266976.3_7	-0.046	4.5286e-10	SE
chr5	77805606	77806221	-	20762	LHFPL2	ENSG00000145685.14_8	0.088	0.00070989	SE
chr17	30536368	30536464	+	20793	RHOT1	ENSG00000126858.18_7	-0.181	0.00158325	SE
chr17	30536368	30536464	+	20794	RHOT1	ENSG00000126858.18_7	-0.132	0.000653255	SE
chr17	30538134	30538257	+	20796	RHOT1	ENSG00000126858.18_7	0.169	0.00578575	SE
chr5	75008678	75008776	-	20807	POC5	ENSG00000152359.15_8	-0.072	0.042145	SE
chr5	75008678	75008776	-	20808	POC5	ENSG00000152359.15_8	-0.057	0.000795257	SE
chr22	22024854	22024900	+	20830	PPIL2	ENSG00000100023.19_6	-0.39	0.0607685	SE
chr5	71622438	71622568	+	20882	PTCD2	ENSG00000049883.15_6	0.029	0.085936	SE
chr5	71630844	71630923	+	20891	PTCD2	ENSG00000049883.15_6	0.074	0.00497537	SE
chr5	68548244	68548278	+	20998	CDK7	ENSG00000134058.12_6	-0.056	0.00176341	SE
chr5	68551286	68551355	+	21004	CDK7	ENSG00000134058.12_6	-0.068	0.0018744	SE
chrX	77218119	77218311	+	21022	ATP7A	ENSG00000165240.20_7	-0.132	0.0655657	SE
chr5	68522168	68522228	+	21038	MRPS36	ENSG00000134056.12_5	-0.014	0.0809247	SE
chr22	38037132	38037175	+	21108	SH3BP1	ENSG00000100092.24_9	-0.054	0.0573515	SE
chr14	23738132	23738172	+	21126	RNF212B	ENSG00000215277.8_8	-0.286	0.0200805	SE
chr1	203702350	203702528	+	21159	ATP2B4	ENSG00000058668.15_6	-0.04	0.0232649	SE
chr7	139059146	139059217	+	21162	LUC7L2	ENSG00000146963.18_6	0.055	0.0124344	SE
chr7	6439756	6439819	+	21201	RAC1	ENSG00000136238.18_6	-0.205	0.0493725	SE
chr7	156480723	156480885	-	21252	LMBR1	ENSG00000105983.22_8	0.025	0.0852464	SE
chr7	156572348	156572426	-	21264	LMBR1	ENSG00000105983.22_8	-0.079	0.055457	SE
chr5	138614015	138614097	+	21273	MATR3	ENSG00000280987.4_8	-0.017	0.00162096	SE
chr5	41927114	41927350	+	21356	FBXO4	ENSG00000151876.13_5	-0.035	0.0414852	SE
chr5	41939542	41939718	+	21358	FBXO4	ENSG00000151876.13_5	0.034	0.0869758	SE
chr5	41912170	41912285	+	21360	C5orf51	ENSG00000205765.9_5	-0.028	0.00477	SE
chr5	37307398	37307534	-	21431	NUP155	ENSG00000113569.16_6	-0.016	0.00658558	SE
chr12	5513327	5513465	+	21482	AC007848.1	ENSG00000255983.1_6	-0.198	0.0386037	SE
chr1	150990287	150990380	+	21484	PRUNE1	ENSG00000143363.17_8	-0.033	0.0423236	SE
chr5	34004678	34004839	-	21524	AMACR	ENSG00000242110.8_8	-0.049	0.0809899	SE
chr17	80422162	80422306	+	21551	NARF	ENSG00000141562.18_8	-0.009	0.000256822	SE
chr17	80438282	80438420	+	21560	NARF	ENSG00000141562.18_8	-0.005	0.0645001	SE
chr5	29169666	29169693	+	21660	LINC02109	ENSG00000259786.7_7	-0.275	0.0138859	SE
chr5	29180155	29180381	+	21673	LINC02109	ENSG00000259786.7_7	0.084	0.0649604	SE
chr18	12840712	12840961	-	21772	PTPN2	ENSG00000175354.20_8	-0.011	0.0790377	SE
chr2	21357633	21357719	+	21796	TDRD15	ENSG00000218819.6_6	-0.106	0.0760777	SE
chr22	42191414	42191546	+	21815	MEI1	ENSG00000167077.13_7	0.189	0.00104142	SE
chr5	10381911	10382055	+	21887	MARCHF6	ENSG00000145495.16_7	0.014	0.0231519	SE
chr10	135278609	135278678	+	21961	SCART1	ENSG00000214279.13_5	0.105	0.00414759	SE
chr10	135279738	135279885	+	21963	SCART1	ENSG00000214279.13_5	0.312	9.82564e-07	SE
chr7	124469307	124469396	-	21976	POT1	ENSG00000128513.16_8	0.021	0.0154508	SE
chr5	74034326	74034467	-	22001	GFM2	ENSG00000164347.18_8	0.03	0.0159074	SE
chr5	64081307	64081406	+	22011	CWC27	ENSG00000153015.16_6	-0.017	0.0243944	SE
chr1	53715051	53715228	-	22017	LRP8	ENSG00000157193.18_10	-0.222	8.20648e-11	SE
chr4	169923221	169923356	-	22283	CBR4	ENSG00000145439.12_7	0.014	0.0674365	SE
chr12	49960504	49960624	-	22297	MCRS1	ENSG00000187778.14_6	0.016	0.0549671	SE
chr2	132273174	132273320	+	22346	SMPD4BP	ENSG00000152117.17_7	0.072	0.073847	SE
chr4	159136342	159136465	+	22377	TMEM144	ENSG00000164124.11_6	0.093	0.00476819	SE
chr2	153535569	153535623	-	22393	PRPF40A	ENSG00000196504.19_10	0.021	0.0039287	SE
chr4	154271215	154271281	+	22418	MND1	ENSG00000121211.8_6	-0.143	0.0580613	SE
chr2	197729710	197729804	-	22438	PGAP1	ENSG00000197121.15_6	0.305	0.00558615	SE
chr5	138610052	138610118	+	22459	SNHG4	ENSG00000281398.4_8	-0.044	0.00505309	SE
chr5	138614253	138614429	+	22460	SNHG4	ENSG00000281398.4_8	0.028	0.000351178	SE
chr11	35219667	35219793	+	22504	CD44	ENSG00000026508.20_10	0.144	0.00208158	SE
chr11	35219667	35219793	+	22508	CD44	ENSG00000026508.20_10	-0.018	0.00789814	SE
chr11	35222628	35222742	+	22510	CD44	ENSG00000026508.20_10	-0.06	0.00320677	SE
chr11	35222628	35222742	+	22511	CD44	ENSG00000026508.20_10	-0.15	0.000451787	SE
chr11	35226058	35226187	+	22518	CD44	ENSG00000026508.20_10	-0.044	7.57778e-05	SE
chr11	35229651	35229753	+	22530	CD44	ENSG00000026508.20_10	-0.016	0.0358729	SE
chr11	35229651	35229753	+	22531	CD44	ENSG00000026508.20_10	0.077	0.0860661	SE
chr11	35229651	35229753	+	22534	CD44	ENSG00000026508.20_10	0.176	0.00342298	SE
chr11	35232792	35232996	+	22540	CD44	ENSG00000026508.20_10	-0.113	4.69579e-08	SE
chr6	43028255	43028343	+	22565	KLC4	ENSG00000137171.15_7	-0.296	0.0384454	SE
chr6	43028255	43028343	+	22566	KLC4	ENSG00000137171.15_7	-0.284	0.0130277	SE
chr6	43028255	43028343	+	22567	KLC4	ENSG00000137171.15_7	-0.108	0.0958143	SE
chr6	28112108	28112202	+	22617	ZKSCAN8	ENSG00000198315.11_5	-0.119	1.30017e-05	SE
chr4	145039866	145039905	-	22673	GYPA	ENSG00000170180.22_9	0.021	0.0943978	SE
chr4	145041642	145041741	-	22686	GYPA	ENSG00000170180.22_9	-0.022	0.0104184	SE
chr10	104175773	104175876	-	22740	PSD	ENSG00000059915.17_8	-0.364	0.0038445	SE
chr7	91734991	91735077	+	22771	AKAP9	ENSG00000127914.17_11	-0.056	0.0657845	SE
chr4	140299909	140300008	+	22801	NAA15	ENSG00000164134.13_5	-0.362	0.0182399	SE
chr11	2970456	2970494	-	23000	NAP1L4	ENSG00000205531.13_8	0.134	7.41292e-05	SE
chr11	3010358	3010501	-	23007	NAP1L4	ENSG00000205531.13_8	-0.047	0.0466385	SE
chr4	120350574	120350764	-	23073	GTF2IP12	ENSG00000283050.2_9	0.116	0.00357057	SE
chr4	119599198	119599293	-	23121	METTL14-DT	ENSG00000281731.3_10	-0.314	0.056708	SE
chr6	31555417	31555510	+	23187	LST1	ENSG00000204482.11_5	0.667	0.000229391	SE
chr4	109753535	109753589	-	23289	COL25A1	ENSG00000188517.16_9	-0.188	0.0350427	SE
chr4	108984778	108984819	-	23332	LEF1	ENSG00000138795.10_8	-0.139	0.0767438	SE
chr13	51602343	51602540	-	23339	GUCY1B2	ENSG00000123201.14_6	0.591	0.000243002	SE
chr16	4871547	4871598	-	23358	GLYR1	ENSG00000140632.17_7	0.027	0.0329649	SE
chr12	6762395	6762562	-	23365	ING4	ENSG00000111653.20_7	0.036	0.0288282	SE
chr3	129180070	129180147	+	23390	IFT122	ENSG00000163913.12_9	0.048	0.0323917	SE
chr3	129183477	129183624	+	23393	IFT122	ENSG00000163913.12_9	0.038	0.0152918	SE
chr4	105982383	105982631	+	23453	AC096577.1	ENSG00000248373.6_8	0.152	0.0673542	SE
chr4	106037985	106038075	+	23454	AC096577.1	ENSG00000248373.6_8	0.343	0.0159141	SE
chr3	48576686	48576743	-	23549	PFKFB4	ENSG00000114268.12_7	-0.016	0.0632689	SE
chr2	217385436	217385497	+	23632	RPL37A	ENSG00000197756.10_5	-0.122	4.37791e-09	SE
chr4	83891479	83891622	-	23768	LIN54	ENSG00000189308.11_6	0.03	0.0128934	SE
chr4	83763292	83763634	-	23788	SEC31A	ENSG00000138674.17_8	0.099	1.84481e-08	SE
chr4	83763337	83763634	-	23789	SEC31A	ENSG00000138674.17_8	0.113	2.70186e-09	SE
chr4	83766353	83766446	-	23792	SEC31A	ENSG00000138674.17_8	-0.039	4.04981e-06	SE
chr4	83796879	83796975	-	23806	SEC31A	ENSG00000138674.17_8	0.01	0.0661012	SE
chr2	106713173	106713277	-	23838	UXS1	ENSG00000115652.15_5	-0.028	0.000165895	SE
chr4	113558799	113558943	+	23865	LARP7	ENSG00000174720.16_9	-0.466	0.00482625	SE
chr4	113558799	113558943	+	23866	LARP7	ENSG00000174720.16_9	-0.031	0.0113898	SE
chr4	113559773	113559829	+	23867	LARP7	ENSG00000174720.16_9	-0.238	0.0688506	SE
chr4	79584071	79584165	+	23925	LINC01094	ENSG00000251442.6_8	0.081	0.0528535	SE
chr4	77916933	77917091	+	23983	SEPTIN11	ENSG00000138758.11_10	-0.053	0.0391483	SE
chr2	47136161	47136316	-	24109	MCFD2	ENSG00000180398.13_6	0.01	0.0623122	SE
chr1	32051353	32051477	+	24123	TINAGL1	ENSG00000142910.16_5	-0.036	0.0575388	SE
chr4	84391355	84391549	-	24163	ABRAXAS1	ENSG00000163322.14_9	0.018	0.0036532	SE
chr4	84393374	84393441	-	24166	ABRAXAS1	ENSG00000163322.14_9	0.059	0.0159629	SE
chr4	84393374	84393441	-	24168	ABRAXAS1	ENSG00000163322.14_9	0.023	0.0251091	SE
chr15	63723403	63723541	+	24188	LINC02568	ENSG00000259459.6_8	0.393	0.0964497	SE
chr6	31708230	31708390	+	24224	MSH5	ENSG00000204410.16_9	0.131	0.00189827	SE
chr1	101458192	101458296	-	24249	DPH5	ENSG00000117543.21_8	0.08	2.91123e-08	SE
chr1	101467022	101467143	-	24258	DPH5	ENSG00000117543.21_8	0.042	4.21174e-08	SE
chr1	101467022	101467143	-	24259	DPH5	ENSG00000117543.21_8	0.027	0.00628378	SE
chr1	101479265	101479374	-	24260	DPH5	ENSG00000117543.21_8	0.031	0.00114858	SE
chr1	101479265	101479374	-	24261	DPH5	ENSG00000117543.21_8	0.051	1.45922e-05	SE
chr1	101490864	101491022	-	24271	DPH5	ENSG00000117543.21_8	0.055	1.94274e-11	SE
chr8	74876721	74876860	-	24392	ELOC	ENSG00000154582.17_6	0.047	8.06878e-05	SE
chr8	74876721	74876860	-	24393	ELOC	ENSG00000154582.17_6	0.038	0.0798203	SE
chr8	74876721	74876860	-	24396	ELOC	ENSG00000154582.17_6	0.104	0.00355976	SE
chr8	74876721	74876860	-	24397	ELOC	ENSG00000154582.17_6	0.155	3.68586e-06	SE
chr8	74881794	74881908	-	24399	ELOC	ENSG00000154582.17_6	-0.227	0.0209171	SE
chr8	74881794	74881908	-	24400	ELOC	ENSG00000154582.17_6	-0.214	0.0863827	SE
chr8	74881794	74881908	-	24402	ELOC	ENSG00000154582.17_6	-0.298	0.0138592	SE
chr8	74881794	74881908	-	24403	ELOC	ENSG00000154582.17_6	-0.025	0.000902442	SE
chr8	74881794	74881908	-	24404	ELOC	ENSG00000154582.17_6	-0.039	0.0442428	SE
chr8	74881794	74881908	-	24407	ELOC	ENSG00000154582.17_6	-0.145	0.000465304	SE
chr8	74881794	74881908	-	24408	ELOC	ENSG00000154582.17_6	-0.141	0.00394398	SE
chr17	30354787	30354859	+	24445	LRRC37B	ENSG00000185158.12_8	-0.114	0.0531041	SE
chr12	105504902	105505042	+	24458	WASHC4	ENSG00000136051.15_5	0.08	0.000647682	SE
chr5	74695134	74695212	-	24521	CERT1	ENSG00000113163.17_8	-0.103	0.000246229	SE
chr4	54257596	54257665	+	24540	FIP1L1	ENSG00000145216.16_8	0.106	0.00142673	SE
chr4	54280781	54280889	+	24541	FIP1L1	ENSG00000145216.16_8	-0.115	1.97185e-06	SE
chr1	156703800	156704285	+	24630	RRNAD1	ENSG00000143303.12_8	-0.06	0.0932067	SE
chr13	21163949	21164006	+	24667	IFT88	ENSG00000032742.17_7	0.059	0.027358	SE
chr22	19794181	19794280	-	24684	GNB1L	ENSG00000185838.14_7	-0.075	0.00359985	SE
chr22	19808750	19808898	-	24690	GNB1L	ENSG00000185838.14_7	-0.072	0.00340437	SE
chr4	44719129	44719312	-	24772	GNPDA2	ENSG00000163281.12_8	0.04	0.0899148	SE
chr12	69651814	69651925	+	24810	CPSF6	ENSG00000111605.18_7	0.21	0.000229946	SE
chr12	3753760	3753806	-	24835	CRACR2A	ENSG00000130038.10_9	0.046	0.0270902	SE
chr5	133712359	133712385	+	24853	UBE2B	ENSG00000119048.8_6	-0.067	5.66061e-07	SE
chr5	133712359	133712385	+	24854	UBE2B	ENSG00000119048.8_6	-0.078	4.876e-07	SE
chr5	133716409	133716499	+	24855	UBE2B	ENSG00000119048.8_6	-0.044	4.02639e-07	SE
chr5	133716409	133716499	+	24856	UBE2B	ENSG00000119048.8_6	-0.363	0.0172287	SE
chr5	133724015	133724104	+	24859	UBE2B	ENSG00000119048.8_6	-0.022	5.82175e-07	SE
chr4	36617075	36617148	-	24948	LINC02505	ENSG00000248215.6_9	0.157	0.0492383	SE
chr11	7687681	7687781	-	24975	CYB5R2	ENSG00000166394.15_6	0.099	0.0601751	SE
chr4	26364067	26364250	+	25020	RBPJ	ENSG00000168214.20_9	0.136	0.000345103	SE
chr6	125574862	125574901	+	25066	TPD52L1	ENSG00000111907.21_10	-0.099	4.59249e-06	SE
chr6	125574862	125574901	+	25067	TPD52L1	ENSG00000111907.21_10	-0.138	6.53678e-05	SE
chr12	133083837	133083974	+	25183	FBRSL1	ENSG00000112787.13_9	0.076	0.00317162	SE
chr4	10099334	10099515	-	25274	WDR1	ENSG00000071127.17_6	0.01	0.0633071	SE
chr4	10105519	10105610	-	25277	WDR1	ENSG00000071127.17_6	0.02	0.0687543	SE
chr1	28599868	28600019	+	25312	SESN2	ENSG00000130766.5_5	0.012	0.0620294	SE
chr16	31901527	31901571	+	25326	ZNF267	ENSG00000185947.15_6	0.035	0.00453343	SE
chr19	39924133	39924209	-	25372	RPS16	ENSG00000105193.9_6	0.465	0.00182862	SE
chr5	7873485	7873639	+	25406	MTRR	ENSG00000124275.15_8	-0.136	0.00493769	SE
chr4	1316168	1316291	+	25520	MAEA	ENSG00000090316.16_6	0.022	0.0111063	SE
chr19	9770054	9770143	-	25587	ZNF562	ENSG00000171466.10_7	0.381	1.21875e-05	SE
chr4	429558	429668	-	25616	ZNF721	ENSG00000182903.16_8	0.068	0.053107	SE
chr11	66467996	66468753	-	25642	SPTBN2	ENSG00000173898.14_7	0.082	0.000776611	SE
chr3	197585704	197585776	+	25661	LRCH3	ENSG00000186001.14_8	-0.152	0.00417584	SE
chr3	197592293	197592342	+	25662	LRCH3	ENSG00000186001.14_8	-0.128	0.0522003	SE
chrX	55028683	55028864	+	25714	APEX2	ENSG00000169188.5_5	0.016	0.00419134	SE
chr4	56840911	56841135	+	25761	CEP135	ENSG00000174799.11_5	0.086	0.000888375	SE
chr3	195925659	195925745	-	25801	ZDHHC19	ENSG00000163958.14_6	0.079	0.0420573	SE
chr1	12048778	12048900	+	25812	MFN2	ENSG00000116688.18_9	0.243	0.0038782	SE
chr1	12063814	12063946	+	25827	MFN2	ENSG00000116688.18_9	-0.035	0.0120535	SE
chr3	195415072	195415190	+	25853	MUC20-OT1	ENSG00000242086.8_8	-0.65	4.07679e-06	SE
chr3	195416209	195416309	+	25860	MUC20-OT1	ENSG00000242086.8_8	0.033	0.0981936	SE
chr3	195444897	195445067	+	25877	MUC20-OT1	ENSG00000242086.8_8	0.612	0.0424593	SE
chr8	124525437	124525622	-	25883	FBXO32	ENSG00000156804.7_6	-0.087	0.0138872	SE
chr17	49279382	49279438	-	25954	MBTD1	ENSG00000011258.16_7	0.056	0.0501046	SE
chr5	159703275	159703419	-	25960	CCNJL	ENSG00000135083.16_9	-0.066	0.0917653	SE
chr19	57987027	57987154	-	25973	ZNF772	ENSG00000197128.11_6	0.076	0.0804245	SE
chr6	34204980	34205094	+	26034	HMGA1	ENSG00000137309.20_5	0.136	0.000891106	SE
chr1	84768885	84768970	+	26042	SAMD13	ENSG00000203943.9_7	-0.201	0.00926483	SE
chr1	84768885	84768970	+	26043	SAMD13	ENSG00000203943.9_7	-0.27	0.000179844	SE
chr9	100090301	100090428	+	26048	CCDC180	ENSG00000197816.16_7	-0.046	0.0520345	SE
chr9	100109595	100109771	+	26053	CCDC180	ENSG00000197816.16_7	-0.07	0.0799331	SE
chr9	100122263	100122383	+	26056	CCDC180	ENSG00000197816.16_7	0.051	0.0454179	SE
chr9	100126332	100126410	+	26058	CCDC180	ENSG00000197816.16_7	-0.091	0.0158851	SE
chr12	53861588	53861627	+	26075	PCBP2	ENSG00000197111.16_6	-0.048	0.00126024	SE
chr12	53861588	53861627	+	26076	PCBP2	ENSG00000197111.16_6	-0.018	0.00140881	SE
chr2	11315093	11315135	+	26096	SLC66A3	ENSG00000162976.13_6	-0.14	0.000212421	SE
chr9	68433464	68433566	-	26104	FRG1JP	ENSG00000215548.2_5	0.149	3.63763e-05	SE
chr9	68438557	68438683	-	26107	FRG1JP	ENSG00000215548.2_5	0.133	7.69906e-05	SE
chr10	114650724	114650831	+	26183	AL158212.1	ENSG00000225292.2_8	-0.618	0.000111519	SE
chr3	184082920	184083014	+	26190	POLR2H	ENSG00000163882.9_4	-0.134	0.00249248	SE
chr6	99375580	99375698	-	26272	FBXL4	ENSG00000112234.9_6	-0.031	0.0348048	SE
chr1	59154709	59154788	-	26316	MYSM1	ENSG00000162601.11_7	0.037	0.0112672	SE
chr16	75678180	75678360	-	26345	KARS1	ENSG00000065427.15_9	0.08	0.00429529	SE
chr1	26620695	26620822	-	26367	UBXN11	ENSG00000158062.20_7	-0.035	0.00452654	SE
chr1	26629303	26629409	-	26380	UBXN11	ENSG00000158062.20_7	0.045	0.00384565	SE
chr20	23347639	23347734	+	26410	GZF1	ENSG00000125812.16_7	-0.072	0.00203552	SE
chr4	56755053	56755098	+	26435	EXOC1	ENSG00000090989.18_6	-0.045	0.000245148	SE
chrX	148619164	148619310	-	26442	LINC00893	ENSG00000241769.7_10	0.169	0.019388	SE
chr12	112374495	112374634	-	26523	TMEM116	ENSG00000198270.13_9	0.094	0.000185548	SE
chr12	76853638	76853675	-	26641	OSBPL8	ENSG00000091039.17_8	0.096	0.0186349	SE
chr2	166165674	166165766	+	26648	SCN2A	ENSG00000136531.18_10	0.333	0.00980969	SE
chr11	75163860	75164015	-	26730	GDPD5	ENSG00000158555.15_7	-0.301	0.0153345	SE
chr7	99056769	99056886	-	26735	ATP5MF	ENSG00000241468.8_7	0.012	0.000902442	SE
chr7	108158633	108158745	-	26790	PNPLA8	ENSG00000135241.17_10	0.133	0.0922561	SE
chr7	108158633	108158745	-	26791	PNPLA8	ENSG00000135241.17_10	0.036	0.0955067	SE
chr5	88201518	88201590	+	26862	MEF2C-AS1	ENSG00000248309.7_10	-0.159	0.0341568	SE
chr5	88243952	88244032	+	26866	MEF2C-AS1	ENSG00000248309.7_10	0.183	0.0642477	SE
chr6	167426995	167427055	+	26900	CEP43	ENSG00000213066.13_7	0.254	0	SE
chr3	160083830	160083940	-	26914	IFT80	ENSG00000068885.15_10	0.039	0.0204546	SE
chr1	155227075	155227177	-	26920	SCAMP3	ENSG00000116521.11_6	-0.112	0.0417794	SE
chr17	53485106	53485181	-	26945	MMD	ENSG00000108960.9_7	-0.058	0.0667147	SE
chr3	157002766	157004130	+	27019	AC092944.1	ENSG00000243176.6_8	0.18	0.00427758	SE
chr3	157004060	157004130	+	27020	AC092944.1	ENSG00000243176.6_8	0.255	0.00491437	SE
chr16	1733509	1733593	+	27035	JPT2	ENSG00000206053.13_9	-0.127	3.48467e-06	SE
chr3	156570556	156570771	+	27043	LEKR1	ENSG00000197980.13_6	0.08	0.0840782	SE
chr5	68667280	68667384	+	27056	RAD17	ENSG00000152942.19_10	-0.2	0.0172797	SE
chr5	68667280	68667384	+	27058	RAD17	ENSG00000152942.19_10	-0.216	0.0212607	SE
chr1	181021370	181021646	+	27136	MR1	ENSG00000153029.14_4	-0.099	0.00710727	SE
chr15	65899496	65899780	-	27195	INTS14	ENSG00000138614.15_8	-0.016	0.0486722	SE
chr15	65899639	65899780	-	27198	INTS14	ENSG00000138614.15_8	-0.045	0.0650933	SE
chr17	74723051	74723260	+	27229	METTL23	ENSG00000181038.14_7	-0.214	0.00384095	SE
chr17	74725771	74725876	+	27231	METTL23	ENSG00000181038.14_7	-0.06	0.0542436	SE
chr3	152017193	152018156	+	27279	MBNL1	ENSG00000152601.17_7	0.014	0.0657043	SE
chr3	152164492	152164546	+	27297	MBNL1	ENSG00000152601.17_7	0.083	0.0136958	SE
chr3	152173330	152173366	+	27303	MBNL1	ENSG00000152601.17_7	-0.338	0.00156173	SE
chr3	152173330	152173366	+	27306	MBNL1	ENSG00000152601.17_7	-0.036	0.00433222	SE
chr3	152173330	152173366	+	27307	MBNL1	ENSG00000152601.17_7	-0.026	0.0244517	SE
chr3	158366829	158366946	+	27398	GFM1	ENSG00000168827.15_8	-0.019	0.0461934	SE
chr2	204110568	204110618	+	27496	CYP20A1	ENSG00000119004.16_6	0.133	0.0612303	SE
chr3	93647545	93647641	-	27524	PROS1	ENSG00000184500.16_9	-0.375	1.27335e-11	SE
chr19	38797553	38797630	-	27675	YIF1B	ENSG00000167645.17_7	0.029	0.0374228	SE
chr3	12647699	12647798	-	27694	RAF1	ENSG00000132155.12_7	-0.041	0.00716332	SE
chr3	138219576	138219723	-	27727	CEP70	ENSG00000114107.9_9	0.023	0.0261622	SE
chr15	82555699	82555779	+	27774	SAXO2	ENSG00000188659.9_8	-0.144	0.0876842	SE
chr12	68710360	68710390	-	27786	MDM1	ENSG00000111554.14_5	0.212	0.00680171	SE
chr14	102298037	102298141	+	27809	PPP2R5C	ENSG00000078304.19_8	0.067	0.0987816	SE
chr14	102298037	102298141	+	27810	PPP2R5C	ENSG00000078304.19_8	0.111	0.0795252	SE
chr14	102298037	102298141	+	27811	PPP2R5C	ENSG00000078304.19_8	0.014	0.00731894	SE
chr17	45401819	45401889	+	27844	EFCAB13	ENSG00000178852.16_8	0.1	0.0573706	SE
chr17	45425173	45425317	+	27847	EFCAB13	ENSG00000178852.16_8	0.158	0.0326255	SE
chr1	225974563	225974687	+	27870	SRP9	ENSG00000143742.14_6	0.091	0.0109193	SE
chr5	123976944	123977098	-	27879	ZNF608	ENSG00000168916.15_6	-0.081	0.0511918	SE
chr5	137502206	137502416	-	27937	BRD8	ENSG00000112983.18_6	-0.037	0.0466397	SE
chr5	102360834	102361038	+	27965	PAM	ENSG00000145730.20_8	0.021	0.052465	SE
chr5	102363885	102363942	+	27966	PAM	ENSG00000145730.20_8	0.034	0.0302179	SE
chr5	102363888	102363942	+	27968	PAM	ENSG00000145730.20_8	0.034	0.0513946	SE
chr14	74512762	74512833	+	28014	BBOF1	ENSG00000119636.16_8	-0.136	0.027027	SE
chr14	74514632	74514777	+	28016	BBOF1	ENSG00000119636.16_8	-0.185	0.0166235	SE
chr14	74516404	74516898	+	28019	BBOF1	ENSG00000119636.16_8	-0.066	0.0160483	SE
chr12	53421565	53421703	+	28038	EIF4B	ENSG00000063046.18_6	0.01	0.000294888	SE
chr4	20703763	20703844	+	28084	PACRGL	ENSG00000163138.19_6	-0.265	0.0149576	SE
chr4	20703763	20703844	+	28085	PACRGL	ENSG00000163138.19_6	-0.165	0.000302585	SE
chr4	20703763	20703844	+	28086	PACRGL	ENSG00000163138.19_6	-0.288	0.0132942	SE
chr4	20709425	20709493	+	28089	PACRGL	ENSG00000163138.19_6	0.064	0.0741189	SE
chr4	20711305	20711396	+	28092	PACRGL	ENSG00000163138.19_6	0.078	0.0171893	SE
chr4	20726430	20726511	+	28103	PACRGL	ENSG00000163138.19_6	0.063	0.0872891	SE
chr4	20726430	20726511	+	28104	PACRGL	ENSG00000163138.19_6	-0.216	2.14355e-06	SE
chr15	67758831	67759049	-	28177	IQCH-AS1	ENSG00000259673.6_8	-0.413	0.075826	SE
chr3	113063362	113063559	-	28279	CFAP44	ENSG00000206530.11_10	0.137	0.00896867	SE
chr1	162562521	162562572	+	28308	UAP1	ENSG00000117143.13_7	0.069	0.0416145	SE
chr1	162562524	162562572	+	28309	UAP1	ENSG00000117143.13_7	0.041	0.0718094	SE
chr3	112729489	112729551	-	28311	NEPRO	ENSG00000163608.15_9	-0.031	0.00267557	SE
chr4	845537	845762	-	28318	GAK	ENSG00000178950.17_8	0.032	0.0746916	SE
chr4	862326	862473	-	28323	GAK	ENSG00000178950.17_8	0.038	0.00315674	SE
chr1	63975735	63975852	-	28390	ITGB3BP	ENSG00000142856.17_5	0.102	0.0001495	SE
chr6	3727784	3727896	-	28391	PXDC1	ENSG00000168994.14_5	0.039	0.0597058	SE
chr9	86242921	86243126	+	28441	IDNK	ENSG00000148057.16_6	0.501	0.015518	SE
chr9	86243095	86243126	+	28442	IDNK	ENSG00000148057.16_6	0.422	0.0388762	SE
chr10	108377906	108378030	-	28450	SORCS1	ENSG00000108018.15_6	-0.043	0.00489013	SE
chr10	108380185	108380319	-	28453	SORCS1	ENSG00000108018.15_6	-0.103	0.00600254	SE
chr7	53760023	53760166	-	28469	LINC01446	ENSG00000205628.4_9	0.163	0.0306162	SE
chr4	104358091	104358203	+	28508	LINC02428	ENSG00000248740.6_8	0.205	0.0723497	SE
chr19	50430950	50431105	-	28572	NUP62	ENSG00000213024.12_8	0.091	0.0496726	SE
chr22	30384468	30384551	+	28614	MTMR3	ENSG00000100330.16_6	0.028	0.0642016	SE
chr22	30418017	30418128	+	28620	MTMR3	ENSG00000100330.16_6	0.066	0.0325417	SE
chr17	56801400	56801461	+	28646	RAD51C	ENSG00000108384.15_8	-0.023	0.0600183	SE
chr17	56809844	56809905	+	28647	RAD51C	ENSG00000108384.15_8	-0.028	0.0464892	SE
chr22	31685300	31685379	-	28697	PIK3IP1	ENSG00000100100.13_8	0.072	0.0751309	SE
chr19	9526329	9526418	-	28703	ZNF266	ENSG00000174652.19_7	0.037	0.0283645	SE
chr18	43678137	43678245	-	28734	ATP5F1A	ENSG00000152234.16_9	0.038	0.0336508	SE
chr5	133510152	133510205	-	28742	SKP1	ENSG00000113558.19_8	-0.008	0.000303255	SE
chr5	56532939	56532999	+	28854	GPBP1	ENSG00000062194.16_5	-0.164	1.01919e-05	SE
chr4	99300167	99300314	+	28861	RAP1GDS1	ENSG00000138698.15_6	0.021	0.0968159	SE
chr3	170846502	170846667	-	28931	TNIK	ENSG00000154310.17_8	0.03	0.025262	SE
chr3	170857258	170857345	-	28932	TNIK	ENSG00000154310.17_8	-0.101	0.0464568	SE
chr6	33381512	33381608	+	28975	PHF1	ENSG00000112511.18_4	-0.04	0.00013345	SE
chr6	33382731	33382921	+	28976	PHF1	ENSG00000112511.18_4	0.016	0.0385945	SE
chr3	73006379	73006503	+	29023	GXYLT2	ENSG00000172986.13_6	-0.051	0.0464447	SE
chr3	130887673	130887781	+	29026	NEK11	ENSG00000114670.14_5	0.14	0.00638501	SE
chr3	71823595	71823658	-	29035	PROK2	ENSG00000163421.9_7	0.301	0.00404391	SE
chr3	71021161	71021331	-	29059	FOXP1	ENSG00000114861.22_9	0.036	0.0875596	SE
chr3	71384310	71384428	-	29069	FOXP1	ENSG00000114861.22_9	0.2	0.000294162	SE
chr3	71384310	71384432	-	29070	FOXP1	ENSG00000114861.22_9	0.138	0.0130676	SE
chr9	99106185	99106278	-	29206	SLC35D2	ENSG00000130958.13_7	-0.436	6.4393e-07	SE
chr9	99113384	99113453	-	29212	SLC35D2	ENSG00000130958.13_7	-0.442	0.0725383	SE
chr19	52031413	52031507	-	29241	SIGLEC6	ENSG00000105492.16_8	0.214	0.0306005	SE
chr19	37753443	37753557	+	29264	LINC01535	ENSG00000226686.8_7	0.226	0.00998492	SE
chr3	63995372	63995429	+	29273	PSMD6-AS2	ENSG00000239653.1_7	0.198	0.0517046	SE
chr17	45697102	45697150	+	29383	NPEPPS	ENSG00000141279.16_8	-0.017	0.0370212	SE
chr3	58419357	58419411	-	29403	PDHB	ENSG00000168291.13_7	0.035	0.0445282	SE
chr3	58117653	58117746	+	29418	FLNB	ENSG00000136068.15_7	0.063	0.09987	SE
chr3	58127584	58127623	+	29420	FLNB	ENSG00000136068.15_7	0.116	4.2176e-07	SE
chr3	58127584	58127656	+	29421	FLNB	ENSG00000136068.15_7	0.163	0.000563112	SE
chr3	57569624	57569734	-	29471	ARF4	ENSG00000168374.11_7	-0.054	8.97664e-05	SE
chr9	114814678	114814718	-	29479	SUSD1	ENSG00000106868.17_7	-0.034	0.0501166	SE
chr9	114842353	114842445	-	29490	SUSD1	ENSG00000106868.17_7	0.232	0.000846183	SE
chrX	40456500	40456596	+	29541	ATP6AP2	ENSG00000182220.15_10	-0.01	0.0421323	SE
chr15	25212175	25212299	+	29596	SNRPN	ENSG00000128739.23_9	-0.725	2.17146e-08	SE
chr3	52848224	52848379	-	29598	AC006254.1	ENSG00000243696.5_10	0.124	0.0238263	SE
chr3	52232687	52232864	+	29663	ALAS1	ENSG00000023330.15_5	0.161	0.0963224	SE
chr1	206772816	206772966	-	29712	EIF2D	ENSG00000143486.16_9	0.009	0.0997254	SE
chr1	206773086	206773190	-	29713	EIF2D	ENSG00000143486.16_9	0.014	0.0483863	SE
chr10	99213555	99213603	+	29735	ZDHHC16	ENSG00000171307.19_6	0.209	7.55881e-05	SE
chr4	83372195	83372398	+	29777	ENOPH1	ENSG00000145293.16_6	0.076	3.439e-05	SE
chr17	80010250	80010335	+	29836	GPS1	ENSG00000169727.12_7	0.02	0.00518275	SE
chr3	49879258	49879372	-	29896	TRAIP	ENSG00000183763.9_6	-0.138	0.0291969	SE
chr10	28884661	28884970	+	29938	WAC	ENSG00000095787.23_9	0.029	0.0112839	SE
chr10	28900183	28900410	+	29943	WAC	ENSG00000095787.23_9	0.028	0.00913722	SE
chr3	49463315	49463429	-	29957	NICN1	ENSG00000145029.14_6	0.086	0.000599689	SE
chr18	44593391	44593490	+	29997	KATNAL2	ENSG00000167216.17_10	-0.157	0.00818288	SE
chr16	58534891	58534981	+	30037	NDRG4	ENSG00000103034.14_8	0.78	2.62789e-07	SE
chr3	48745552	48745670	-	30070	IP6K2	ENSG00000068745.15_6	0.035	0.092927	SE
chr3	48752821	48752960	-	30076	IP6K2	ENSG00000068745.15_6	0.073	0.0901696	SE
chr3	48540527	48540626	-	30096	SHISA5	ENSG00000164054.15_7	-0.108	0.00101719	SE
chr6	84936054	84936170	-	30121	CEP162	ENSG00000135315.12_7	0.076	0.0664737	SE
chr3	48309407	48309650	+	30151	ZNF589	ENSG00000164048.14_5	0.032	0.0774833	SE
chr10	89000938	89005612	-	30170	NUTM2A-AS1	ENSG00000223482.8_11	0.093	0.0315117	SE
chr10	89083848	89083922	-	30179	NUTM2A-AS1	ENSG00000223482.8_11	-0.022	0.00710861	SE
chr10	89083848	89083922	-	30180	NUTM2A-AS1	ENSG00000223482.8_11	-0.078	5.02071e-05	SE
chr3	47539775	47539922	-	30187	ELP6	ENSG00000163832.16_8	0.022	0.0697018	SE
chr5	115238581	115238689	+	30214	AP3S1	ENSG00000177879.17_5	0.01	0.0768276	SE
chr8	100050650	100050794	+	30215	VPS13B	ENSG00000132549.18_8	-0.054	0.00223194	SE
chr8	100519364	100519431	+	30219	VPS13B	ENSG00000132549.18_8	-0.061	0.0925472	SE
chr8	100519997	100520139	+	30220	VPS13B	ENSG00000132549.18_8	-0.107	0.0889977	SE
chr19	37571246	37571290	+	30286	ZNF420	ENSG00000197050.11_8	-0.092	0.0295139	SE
chrX	3736697	3736744	-	30302	BX890604.2	ENSG00000285756.2_5	0.375	6.06519e-05	SE
chr9	108483817	108484002	+	30374	TMEM38B	ENSG00000095209.12_9	-0.018	0.00385634	SE
chr9	108484814	108484902	+	30376	TMEM38B	ENSG00000095209.12_9	-0.266	0.026722	SE
chr9	108510353	108510471	+	30379	TMEM38B	ENSG00000095209.12_9	-0.017	0.00611069	SE
chr3	45748271	45748399	+	30383	SACM1L	ENSG00000211456.13_7	-0.072	0.000767064	SE
chr3	44544456	44544548	-	30460	ZNF852	ENSG00000178917.16_7	0.21	0.00390273	SE
chr15	40678562	40678695	+	30577	KNSTRN	ENSG00000128944.13_8	-0.039	0.00306102	SE
chr15	40679359	40679407	+	30578	KNSTRN	ENSG00000128944.13_8	-0.031	0.00998193	SE
chr2	24239714	24239838	+	30621	MFSD2B	ENSG00000205639.12_9	0.188	0.00439378	SE
chr2	24240155	24240234	+	30627	MFSD2B	ENSG00000205639.12_9	-0.139	0.0488733	SE
chr2	24240327	24240458	+	30628	MFSD2B	ENSG00000205639.12_9	0.148	0.00658477	SE
chr2	24245302	24245386	+	30631	MFSD2B	ENSG00000205639.12_9	-0.079	0.0232465	SE
chr3	39142237	39142368	-	30684	GORASP1	ENSG00000114745.13_5	0.057	3.54354e-06	SE
chr3	39121201	39121299	+	30699	WDR48	ENSG00000114742.14_6	-0.042	0.00018328	SE
chr6	30709390	30709481	-	30739	FLOT1	ENSG00000137312.15_8	0.271	0.0549639	SE
chr4	48833243	48833513	+	30772	OCIAD1	ENSG00000109180.14_8	0.096	2.12338e-07	SE
chr3	34387713	34387781	+	30877	LINC01811	ENSG00000226320.6_8	-0.61	0.00446289	SE
chr3	34450752	34450853	+	30895	LINC01811	ENSG00000226320.6_8	-0.581	0.00465899	SE
chr3	33106954	33107049	-	31020	GLB1	ENSG00000170266.16_7	0.127	0.0137245	SE
chr3	25659908	25660000	-	31189	TOP2B	ENSG00000077097.15_10	-0.012	0.0477503	SE
chr7	89983771	89983863	+	31262	GTPBP10	ENSG00000105793.16_5	-0.054	0.000154104	SE
chr7	89984399	89984544	+	31264	GTPBP10	ENSG00000105793.16_5	-0.06	4.9854e-05	SE
chr7	90001468	90001542	+	31272	GTPBP10	ENSG00000105793.16_5	-0.016	0.0788814	SE
chr1	54723741	54723822	-	31363	SSBP3	ENSG00000157216.15_8	-0.315	0.0207873	SE
chr1	54723741	54723822	-	31364	SSBP3	ENSG00000157216.15_8	-0.068	3.42633e-07	SE
chr1	150252053	150252152	+	31372	C1orf54	ENSG00000118292.9_5	-0.289	0.000219259	SE
chrX	154215511	154215580	-	31414	F8	ENSG00000185010.15_8	-0.035	0.062095	SE
chr9	136133486	136133522	-	31485	ABO	ENSG00000175164.15_8	0.259	0.0601694	SE
chr9	136137501	136137571	-	31491	ABO	ENSG00000175164.15_8	0.13	0.0217562	SE
chr10	27047990	27048167	-	31637	ABI1	ENSG00000136754.17_8	0.039	0.0480053	SE
chr10	27060003	27060018	-	31644	ABI1	ENSG00000136754.17_8	-0.101	0.00396122	SE
chr3	169491818	169491885	+	31691	MYNN	ENSG00000085274.15_2	-0.143	0.00864035	SE
chr10	101478102	101478257	-	31758	COX15	ENSG00000014919.13_6	-0.034	0.014088	SE
chr9	140348182	140348272	-	31808	NSMF	ENSG00000165802.23_8	0.037	0.0346895	SE
chr5	176395555	176396292	-	31848	UIMC1	ENSG00000087206.17_8	0.092	0.000172405	SE
chr5	176396053	176396292	-	31850	UIMC1	ENSG00000087206.17_8	0.155	0.00125433	SE
chr5	176396601	176396707	-	31851	UIMC1	ENSG00000087206.17_8	0.123	6.10804e-06	SE
chr3	15046063	15046120	+	31866	NR2C2	ENSG00000177463.15_7	-0.114	0.0920953	SE
chr10	22699959	22700105	+	31937	SPAG6	ENSG00000077327.16_6	0.151	0.00312309	SE
chr1	19202808	19202961	-	31986	ALDH4A1	ENSG00000159423.17_8	0.033	0.00926483	SE
chr1	19212957	19213005	-	31991	RP13-279N23.2	ENSG00000255275.3	0.125	0.000146709	SE
chr1	203765420	203765624	+	32059	ZC3H11A	ENSG00000058673.16_8	-0.021	6.64034e-05	SE
chr1	67515464	67515533	-	32097	SLC35D1	ENSG00000116704.8_6	-0.052	0.0564016	SE
chr7	150749502	150749561	+	32247	ASIC3	ENSG00000213199.8_8	-0.057	0.064109	SE
chr4	107241954	107242046	+	32299	AIMP1	ENSG00000164022.17_5	-0.033	0.00803288	SE
chr19	49964875	49965057	+	32369	ALDH16A1	ENSG00000161618.10_6	-0.004	0.0262195	SE
chr12	53689622	53689725	+	32377	PFDN5	ENSG00000123349.14_6	0.051	5.3668e-09	SE
chr12	53689622	53689725	+	32378	PFDN5	ENSG00000123349.14_6	0.009	0.000341186	SE
chr12	53690027	53690059	+	32380	PFDN5	ENSG00000123349.14_6	0.087	1.7393e-08	SE
chr12	53691633	53691708	+	32382	PFDN5	ENSG00000123349.14_6	0.01	0.000918554	SE
chr5	93217175	93217394	-	32390	FAM172A	ENSG00000113391.19_8	0.05	0.027358	SE
chr5	93386435	93386536	-	32393	FAM172A	ENSG00000113391.19_8	0.079	0.0758936	SE
chr14	102698043	102698158	-	32404	MOK	ENSG00000080823.23_7	0.184	0.000123775	SE
chr17	3626581	3626677	-	32421	ITGAE	ENSG00000083457.12_6	0.182	0.000676409	SE
chr5	176081895	176082021	+	32486	TSPAN17	ENSG00000048140.18_8	-0.031	0.00372674	SE
chr2	231282305	231282380	+	32527	SP100	ENSG00000067066.17_7	-0.061	0.0199015	SE
chr2	231328781	231328865	+	32548	SP100	ENSG00000067066.17_7	0.078	0.000682203	SE
chr2	231331834	231331921	+	32549	SP100	ENSG00000067066.17_7	-0.036	0.010265	SE
chr1	182761366	182761421	+	32561	NPL	ENSG00000135838.13_4	-0.231	0.0825295	SE
chr1	182763490	182763574	+	32564	NPL	ENSG00000135838.13_4	0.017	0.0838837	SE
chr1	182772832	182772906	+	32569	NPL	ENSG00000135838.13_4	0.041	0.0099347	SE
chr1	182775279	182775367	+	32570	NPL	ENSG00000135838.13_4	0.023	0.00685005	SE
chr1	182787947	182787994	+	32582	NPL	ENSG00000135838.13_4	0.037	0.020789	SE
chr1	182791249	182791334	+	32585	NPL	ENSG00000135838.13_4	0.055	0.0130712	SE
chr1	182359631	182359987	-	32593	GLUL	ENSG00000135821.19_7	0.19	3.24612e-06	SE
chr10	44063346	44063469	-	32631	ZNF239	ENSG00000196793.13_5	0.083	0.0211901	SE
chr10	44069084	44069125	-	32633	ZNF239	ENSG00000196793.13_5	-0.119	0.0334934	SE
chr1	212792387	212792608	+	32655	ATF3	ENSG00000162772.17_8	0.031	0.00024055	SE
chr12	21661316	21661495	+	32720	GOLT1B	ENSG00000111711.10_7	-0.087	2.06792e-06	SE
chr2	218161354	218161493	+	32850	DIRC3-AS1	ENSG00000233143.2_7	0.045	0.0884959	SE
chr1	231503314	231503382	-	32876	AL445524.2	ENSG00000287856.1_4	-0.065	0.000130893	SE
chr2	15676541	15676675	-	32905	NBAS	ENSG00000151779.13_7	-0.026	0.0735758	SE
chr4	99807604	99807697	-	32915	EIF4E	ENSG00000151247.12_8	0.015	0.0882997	SE
chr1	225592327	225592408	-	32962	LBR	ENSG00000143815.15_8	0.01	0.0641661	SE
chr1	212985568	212985670	+	33012	TATDN3	ENSG00000203705.11_8	-0.069	0.050568	SE
chr1	168274245	168274434	+	33104	TBX19	ENSG00000143178.13_6	0.063	0.0212712	SE
chr3	52658912	52658957	-	33155	PBRM1	ENSG00000163939.18_9	-0.166	0.0239911	SE
chr2	122518984	122519100	+	33230	TSN	ENSG00000211460.12_7	-0.012	0.0493856	SE
chr1	212615906	212615967	+	33249	NENF	ENSG00000117691.10_5	-0.041	0.00116552	SE
chr2	111966332	111966513	-	33305	MIR4435-2HG	ENSG00000172965.17_10	-0.11	0.000259531	SE
chr2	111966332	111966554	-	33311	MIR4435-2HG	ENSG00000172965.17_10	-0.109	0.000158839	SE
chr2	111991204	111991316	-	33325	MIR4435-2HG	ENSG00000172965.17_10	0.15	0.00562173	SE
chr2	111991204	111991316	-	33340	MIR4435-2HG	ENSG00000172965.17_10	0.143	0.000114207	SE
chr2	111997378	111997573	-	33348	MIR4435-2HG	ENSG00000172965.17_10	0.103	0.0282967	SE
chr2	111997378	111997573	-	33356	MIR4435-2HG	ENSG00000172965.17_10	0.07	0.00184813	SE
chr2	112005724	112005818	-	33373	MIR4435-2HG	ENSG00000172965.17_10	0.332	0.0505068	SE
chr2	112005724	112005818	-	33374	MIR4435-2HG	ENSG00000172965.17_10	-0.155	0.00075602	SE
chr2	112005724	112005818	-	33381	MIR4435-2HG	ENSG00000172965.17_10	-0.165	0.00291749	SE
chr2	112108184	112108338	-	33406	MIR4435-2HG	ENSG00000172965.17_10	-0.031	0.00210139	SE
chr1	184041290	184041328	+	33492	TSEN15	ENSG00000198860.13_6	-0.098	0.00658477	SE
chr1	184041290	184041432	+	33494	TSEN15	ENSG00000198860.13_6	-0.055	0.000562787	SE
chr1	184041290	184041444	+	33496	TSEN15	ENSG00000198860.13_6	-0.063	0.00343791	SE
chr14	24910879	24911001	-	33550	SDR39U1	ENSG00000100445.17_9	0.024	0.0349932	SE
chr6	86248555	86248582	-	33594	SNX14	ENSG00000135317.13_12	-0.094	0.000916387	SE
chr6	86275049	86275137	-	33605	SNX14	ENSG00000135317.13_12	0.314	0.00144805	SE
chr12	27113447	27113561	+	33614	FGFR1OP2	ENSG00000111790.14_6	-0.081	0.0857268	SE
chr9	139744957	139745012	+	33714	PHPT1	ENSG00000054148.18_6	0.043	0.0218849	SE
chr3	38408298	38408364	+	33723	XYLB	ENSG00000093217.11_7	-0.099	0.0156605	SE
chr3	38409675	38409748	+	33724	XYLB	ENSG00000093217.11_7	-0.674	9.13693e-07	SE
chr20	5047854	5048015	-	33814	AL121890.4	ENSG00000277425.1_8	-0.176	0.000872303	SE
chr12	109919441	109919547	+	33884	UBE3B	ENSG00000151148.14_10	0.044	0.0314661	SE
chr1	53416426	53416558	+	33980	SCP2	ENSG00000116171.19_7	0.035	0.000972114	SE
chr1	53504588	53504718	+	33991	SCP2	ENSG00000116171.19_7	0.01	0.0764618	SE
chr5	175607326	175607351	-	34044	AC139493.2	ENSG00000283235.2_10	-0.182	0.0161759	SE
chr5	175607818	175607889	-	34046	AC139493.2	ENSG00000283235.2_10	-0.155	0.0233146	SE
chr1	201617761	201618553	+	34106	NAV1	ENSG00000134369.15_6	0.16	0.0348943	SE
chr1	201757595	201757766	+	34108	NAV1	ENSG00000134369.15_6	0.044	0.022927	SE
chr1	156304658	156304709	-	34131	CCT3	ENSG00000163468.15_6	-0.01	0.000614505	SE
chr1	111963897	111964083	-	34141	OVGP1	ENSG00000085465.13_6	0.059	0.0342462	SE
chr6	134845243	134845376	-	34142	AL078590.2	ENSG00000232310.8_10	-0.581	0.00022496	SE
chr8	124140520	124140753	+	34176	TBC1D31	ENSG00000156787.17_7	-0.078	0.027723	SE
chr2	120643370	120643458	+	34185	PTPN4	ENSG00000088179.9_8	0.027	0.0965254	SE
chr1	155734790	155736500	-	34220	GON4L	ENSG00000116580.18_5	0.018	0.0295869	SE
chr6	35806113	35806206	-	34229	SRPK1	ENSG00000096063.16_9	-0.012	0.0358491	SE
chr1	1643702	1643866	-	34256	CDK11A	ENSG00000008128.23_8	-0.229	0.0143301	SE
chr5	61897590	61897675	+	34282	IPO11	ENSG00000086200.17_10	0.014	0.0890076	SE
chr17	7810918	7811020	+	34292	CHD3	ENSG00000170004.17_9	0.075	0.0016467	SE
chr4	174087795	174087941	-	34378	AC105285.1	ENSG00000245213.7_9	0.039	0.0494578	SE
chr2	97757599	97757725	-	34477	FAHD2B	ENSG00000144199.12_5	0.091	5.18857e-09	SE
chr19	5941631	5941718	-	34526	RANBP3	ENSG00000031823.14_7	-0.044	0.0336448	SE
chr1	154426963	154427057	+	34556	IL6R	ENSG00000160712.13_6	0.076	0.0446335	SE
chr1	28817462	28817524	+	34564	PHACTR4	ENSG00000204138.13_6	0.042	0.0642477	SE
chr4	2498733	2498848	+	34590	RNF4	ENSG00000063978.16_7	-0.111	0.000820282	SE
chr2	74708578	74708665	-	34707	CCDC142	ENSG00000135637.14_9	0.151	0.0324538	SE
chr1	153603486	153603554	-	34717	AL162258.1	ENSG00000271853.5_9	0.349	3.0129e-05	SE
chr3	10023317	10023431	-	34745	EMC3	ENSG00000125037.12_6	-0.025	8.28665e-08	SE
chr1	155279579	155279756	+	34748	FDPS	ENSG00000160752.15_4	0.021	0.0352328	SE
chr1	155279579	155279756	+	34749	FDPS	ENSG00000160752.15_4	-0.036	6.03401e-09	SE
chr1	155279579	155279756	+	34751	FDPS	ENSG00000160752.15_4	-0.158	2.96692e-06	SE
chr3	25761504	25761682	-	34801	NGLY1	ENSG00000151092.18_9	0.016	0.00168826	SE
chr3	25777494	25777640	-	34804	NGLY1	ENSG00000151092.18_9	0.044	7.47278e-05	SE
chr3	25777799	25777891	-	34809	NGLY1	ENSG00000151092.18_9	-0.042	0.00256615	SE
chr3	6736463	6736564	+	34881	AC069277.1	ENSG00000189229.11_9	-0.113	0.0604616	SE
chr3	6752139	6752230	+	34897	AC069277.1	ENSG00000189229.11_9	0.089	0.016365	SE
chr3	6773957	6774182	+	34902	AC069277.1	ENSG00000189229.11_9	0.027	0.0461149	SE
chr12	48739127	48739257	-	34905	ZNF641	ENSG00000167528.13_6	-0.038	0.0649088	SE
chr14	50781308	50781344	+	34908	DMAC2L	ENSG00000125375.16_8	0.207	0.039685	SE
chr2	28863792	28863867	+	35030	PLB1	ENSG00000163803.13_9	0.106	0.0523912	SE
chr5	175786483	175786570	-	35137	KIAA1191	ENSG00000122203.15_7	0.5	0.0122771	SE
chr5	175786813	175786921	-	35142	KIAA1191	ENSG00000122203.15_7	0.029	0.00477122	SE
chr19	50512492	50512642	-	35211	VRK3	ENSG00000105053.11_9	0.038	0.006628	SE
chr1	151196846	151196882	+	35223	PIP5K1A	ENSG00000143398.20_7	0.071	0.00199691	SE
chr1	151214913	151215043	+	35227	PIP5K1A	ENSG00000143398.20_7	0.035	0.0528521	SE
chr2	208420351	208420473	+	35341	CREB1	ENSG00000118260.15_10	0.017	0.0608098	SE
chr14	77250035	77250194	-	35374	VASH1-AS1	ENSG00000258301.3_9	0.128	0.0479302	SE
chr11	63278550	63278577	+	35376	LGALS12	ENSG00000133317.16_4	0.024	0.0318129	SE
chr19	51729564	51729612	+	35408	CD33	ENSG00000105383.15_5	0.063	2.148e-06	SE
chr19	51729564	51729612	+	35410	CD33	ENSG00000105383.15_5	0.034	0.0233146	SE
chr19	51738411	51738508	+	35414	CD33	ENSG00000105383.15_5	0.024	0.0308179	SE
chr19	51738849	51738931	+	35415	CD33	ENSG00000105383.15_5	0.018	0.0373972	SE
chr19	51738849	51738931	+	35416	CD33	ENSG00000105383.15_5	0.016	0.0495324	SE
chr2	32400387	32400430	+	35464	SLC30A6	ENSG00000152683.14_6	-0.297	0.0104395	SE
chr3	66286967	66287124	+	35506	SLC25A26	ENSG00000144741.17_4	0.083	0.0386666	SE
chr3	66413283	66413353	+	35515	SLC25A26	ENSG00000144741.17_4	0.024	0.0280525	SE
chr3	66419901	66419966	+	35516	SLC25A26	ENSG00000144741.17_4	-0.507	0.00499072	SE
chr1	32794668	32794761	+	35625	HDAC1	ENSG00000116478.12_7	-0.013	0.0768688	SE
chr1	167742472	167742605	+	35694	MPZL1	ENSG00000197965.12_7	0.045	0.0841782	SE
chr6	119281933	119282028	-	35699	FAM184A	ENSG00000111879.20_10	-0.139	0.0313779	SE
chr1	156309424	156309582	+	35721	TSACC	ENSG00000163467.12_4	0.129	0.0078741	SE
chr1	156309525	156309582	+	35723	TSACC	ENSG00000163467.12_4	0.172	0.002532	SE
chr1	146638076	146638197	-	35750	PRKAB2	ENSG00000131791.8_6	-0.016	0.0424137	SE
chr9	99271954	99272071	-	35793	CDC14B	ENSG00000081377.17_8	0.166	0.00797414	SE
chr9	99271954	99272071	-	35794	CDC14B	ENSG00000081377.17_8	0.153	0.0185015	SE
chr1	169347567	169347767	+	35833	BLZF1	ENSG00000117475.14_5	-0.014	0.0911476	SE
chr1	231660171	231660293	-	35958	AL445524.1	ENSG00000233461.6_9	-0.485	0.000786678	SE
chr1	231663083	231663161	-	35960	AL445524.1	ENSG00000233461.6_9	0.06	0.00031687	SE
chr1	144952565	144952689	-	36039	PDE4DIP	ENSG00000178104.19_7	0.044	0.0321016	SE
chr10	135095726	135095846	-	36058	TUBGCP2	ENSG00000130640.13_7	0.043	0.0538233	SE
chr1	143360307	143360503	+	36117	RP11-435B5.3	ENSG00000242569.3	0.617	1.4761e-07	SE
chr18	9944920	9945055	+	36201	VAPA	ENSG00000101558.14_7	-0.017	0.0459914	SE
chr18	9944920	9945055	+	36202	VAPA	ENSG00000101558.14_7	-0.04	0.0298809	SE
chr16	71419479	71419551	+	36213	CALB2	ENSG00000172137.19_8	0.238	0.0104135	SE
chr7	56020871	56021011	+	36217	MRPS17	ENSG00000239789.6_6	-0.027	0.0137147	SE
chr13	39616241	39616442	+	36229	NHLRC3	ENSG00000188811.14_6	-0.09	0.0399245	SE
chr5	179306627	179306789	-	36268	TBC1D9B	ENSG00000197226.12_6	0.065	4.66127e-05	SE
chr9	99967142	99967316	-	36277	ANKRD18CP	ENSG00000159712.10_7	0.394	0.0146497	SE
chr5	64848319	64848376	-	36340	CENPK	ENSG00000123219.13_9	0.22	0.0464568	SE
chr3	101447679	101447781	+	36363	CEP97	ENSG00000182504.11_6	-0.043	0.0877525	SE
chr9	135806595	135806814	-	36384	TSC1	ENSG00000165699.15_9	-0.034	0.00652501	SE
chr5	177558237	177558377	+	36421	RMND5B	ENSG00000145916.19_8	0.164	0.000168819	SE
chr5	145532736	145532790	-	36433	LARS1	ENSG00000133706.19_6	0.009	0.063849	SE
chr5	20749632	20749716	+	36469	LINC02241	ENSG00000251629.7_9	0.051	0.060828	SE
chr5	20749632	20749716	+	36473	LINC02241	ENSG00000251629.7_9	-0.238	0.0488183	SE
chr5	20852166	20852212	+	36501	LINC02241	ENSG00000251629.7_9	0.482	0.0743309	SE
chr5	20932991	20933089	+	36503	LINC02241	ENSG00000251629.7_9	-0.088	0.00906861	SE
chr1	155691307	155691409	+	36638	DAP3	ENSG00000132676.16_8	0.024	0.000245709	SE
chr8	56695306	56695371	+	36683	TGS1	ENSG00000137574.11_5	-0.042	0.00167006	SE
chr1	68947728	68948580	-	36717	DEPDC1	ENSG00000024526.17_7	-0.101	0.0615274	SE
chr1	145457934	145458003	-	36738	POLR3GL	ENSG00000121851.13_7	0.025	8.0971e-07	SE
chr2	112631189	112631241	-	36763	ANAPC1	ENSG00000153107.13_7	0.052	0.00336049	SE
chr2	74166036	74166149	+	36900	DGUOK	ENSG00000114956.20_5	0.08	0.00202474	SE
chr2	74173845	74174033	+	36903	DGUOK	ENSG00000114956.20_5	0.015	0.0135836	SE
chr2	74177711	74177859	+	36907	DGUOK	ENSG00000114956.20_5	0.018	0.0303485	SE
chr13	111546455	111546549	-	36918	ANKRD10	ENSG00000088448.14_7	-0.169	0.000752751	SE
chr4	57344544	57344669	+	36930	SRP72	ENSG00000174780.17_8	0.021	0.000221876	SE
chr4	57344757	57344815	+	36932	SRP72	ENSG00000174780.17_8	0.033	0.000126727	SE
chr7	30090049	30090090	+	36953	PLEKHA8	ENSG00000106086.20_8	-0.058	0.0424381	SE
chr4	84380892	84380950	+	36985	MRPS18C	ENSG00000163319.11_7	0.024	0.0796607	SE
chr11	3382972	3383119	-	36992	ZNF195	ENSG00000005801.18_9	0.093	0.0237404	SE
chr11	3394806	3394886	-	37000	ZNF195	ENSG00000005801.18_9	-0.138	0.00685972	SE
chr11	3394806	3394905	-	37002	ZNF195	ENSG00000005801.18_9	-0.113	0.00544442	SE
chr11	3398846	3399130	-	37003	ZNF195	ENSG00000005801.18_9	-0.096	0.000395087	SE
chr1	110888160	110888271	+	37038	RBM15	ENSG00000162775.16_7	-0.199	0.00395605	SE
chr1	90152028	90152170	+	37055	LRRC8C	ENSG00000171488.15_6	-0.035	0.0271594	SE
chr3	108363010	108363628	+	37103	DZIP3	ENSG00000198919.13_7	-0.032	0.0860533	SE
chr3	108365463	108365496	+	37104	DZIP3	ENSG00000198919.13_7	-0.053	0.025199	SE
chr1	25701839	25701919	-	37216	RHCE	ENSG00000188672.19_7	0.022	0.00999069	SE
chr1	25712201	25712335	-	37225	RHCE	ENSG00000188672.19_7	0.051	3.32317e-05	SE
chr1	25737830	25737969	-	37256	RHCE	ENSG00000188672.19_7	-0.219	0.0160772	SE
chr1	25737830	25737969	-	37259	RHCE	ENSG00000188672.19_7	-0.017	0.0647408	SE
chr1	109480787	109480838	-	37281	CLCC1	ENSG00000121940.16_5	-0.09	4.34011e-08	SE
chr1	109496991	109497094	-	37314	CLCC1	ENSG00000121940.16_5	-0.45	0.0492607	SE
chr1	109504930	109505091	-	37322	CLCC1	ENSG00000121940.16_5	0.141	0.0445083	SE
chr4	185621973	185622035	-	37377	CENPU	ENSG00000151725.12_10	-0.043	0.00340569	SE
chr4	185623242	185623290	-	37379	CENPU	ENSG00000151725.12_10	-0.207	0.014841	SE
chr4	185623516	185623595	-	37380	CENPU	ENSG00000151725.12_10	-0.029	0.000271885	SE
chr15	96675768	96675925	-	37412	NR2F2-AS1	ENSG00000247809.9_12	-0.256	0.0951168	SE
chr15	96705750	96705920	-	37413	NR2F2-AS1	ENSG00000247809.9_12	0.586	0.00295128	SE
chr3	37132957	37133029	-	37440	LRRFIP2	ENSG00000093167.18_9	0.032	0.0201988	SE
chr3	37136282	37136399	-	37442	LRRFIP2	ENSG00000093167.18_9	-0.037	0.0591739	SE
chr3	37149563	37149620	-	37452	LRRFIP2	ENSG00000093167.18_9	0.462	0.085416	SE
chr3	37150127	37150175	-	37456	LRRFIP2	ENSG00000093167.18_9	-0.023	0.0431207	SE
chr3	37154405	37154471	-	37462	LRRFIP2	ENSG00000093167.18_9	-0.159	0.00317282	SE
chr1	10715705	10715870	-	37502	CASZ1	ENSG00000130940.15_6	0.157	0.0842633	SE
chr10	126100541	126100769	-	37511	OAT	ENSG00000065154.12_5	0.011	0.000120108	SE
chrX	118715469	118715559	+	37583	UBE2A	ENSG00000077721.16_5	-0.039	0.00116505	SE
chr17	12914979	12915099	-	37682	ELAC2	ENSG00000006744.19_8	0.014	0.00761133	SE
chr2	228207460	228207535	+	37708	MFF	ENSG00000168958.20_9	-0.113	0.0428798	SE
chr2	228211941	228212100	+	37711	MFF	ENSG00000168958.20_9	0.081	0.00152857	SE
chr2	228211941	228212100	+	37714	MFF	ENSG00000168958.20_9	0.082	0.0456875	SE
chr1	204506557	204506625	+	37738	MDM4	ENSG00000198625.13_7	-0.116	0.068242	SE
chr1	204513662	204513812	+	37746	MDM4	ENSG00000198625.13_7	-0.076	3.012e-05	SE
chr11	59402892	59403005	+	37755	AP000442.1	ENSG00000255139.2_9	0.17	0.0267816	SE
chr11	59402892	59403009	+	37756	AP000442.1	ENSG00000255139.2_9	0.163	0.0381538	SE
chr1	114445259	114445484	-	37777	AP4B1	ENSG00000134262.13_6	0.026	0.0936113	SE
chr1	100733055	100733094	+	37779	RTCA	ENSG00000137996.13_4	0.082	0.00275996	SE
chr9	125901807	125901966	-	37841	STRBP	ENSG00000165209.19_7	0.026	0.00551432	SE
chr1	36556844	36556941	+	37848	ADPRS	ENSG00000116863.11_5	0.032	0.0106253	SE
chr6	31691918	31692009	+	37853	MPIG6B	ENSG00000204420.10_9	0.268	0.000533421	SE
chr8	94749534	94749583	-	37887	RBM12B	ENSG00000183808.11_6	-0.027	0.0750342	SE
chr1	151282686	151282731	-	37899	PI4KB	ENSG00000143393.16_10	-0.139	0.0318317	SE
chr15	42573114	42573331	+	37924	GANC	ENSG00000214013.9_5	0.115	0.00174217	SE
chr1	75204373	75204472	+	37972	TYW3	ENSG00000162623.16_6	0.015	0.0147037	SE
chr1	93770944	93771027	-	38047	CCDC18-AS1	ENSG00000223745.8_10	-0.069	0.045239	SE
chr1	93775271	93775347	-	38053	CCDC18-AS1	ENSG00000223745.8_10	0.27	0.0213876	SE
chr1	93775271	93775347	-	38055	CCDC18-AS1	ENSG00000223745.8_10	0.121	0.0819908	SE
chr1	93777046	93777165	-	38058	CCDC18-AS1	ENSG00000223745.8_10	0.135	0.0537925	SE
chr1	93777046	93777165	-	38062	CCDC18-AS1	ENSG00000223745.8_10	0.102	0.0579631	SE
chr1	93790191	93790286	-	38081	CCDC18-AS1	ENSG00000223745.8_10	-0.218	0.0593243	SE
chr1	93790191	93790286	-	38085	CCDC18-AS1	ENSG00000223745.8_10	-0.104	0.000448421	SE
chr1	93791325	93791452	-	38087	CCDC18-AS1	ENSG00000223745.8_10	0.059	0.0323268	SE
chr1	93792158	93792219	-	38091	CCDC18-AS1	ENSG00000223745.8_10	0.074	0.0593533	SE
chr1	93802933	93803069	-	38093	CCDC18-AS1	ENSG00000223745.8_10	0.05	0.00234267	SE
chr12	977031	978270	+	38132	WNK1	ENSG00000060237.18_9	0.165	0.00014285	SE
chr12	977031	978270	+	38134	WNK1	ENSG00000060237.18_9	0.133	0.0242082	SE
chr12	980430	980514	+	38135	WNK1	ENSG00000060237.18_9	-0.111	0.0176313	SE
chr12	980430	980514	+	38138	WNK1	ENSG00000060237.18_9	-0.054	0.0397507	SE
chr12	989886	990165	+	38141	WNK1	ENSG00000060237.18_9	-0.068	0.00136516	SE
chr1	209796326	209796524	-	38266	LAMB3	ENSG00000196878.15_7	0.067	0.0344669	SE
chr2	29016728	29016863	+	38290	PPP1CB	ENSG00000213639.10_8	0.023	0.0383331	SE
chr11	93475128	93475260	+	38336	C11orf54	ENSG00000182919.15_4	0.094	1.26812e-07	SE
chr11	93475128	93475260	+	38337	C11orf54	ENSG00000182919.15_4	0.253	0.0001186	SE
chr1	65811293	65811406	+	38356	DNAJC6	ENSG00000116675.16_6	0.07	0.0691215	SE
chr1	222889025	222889142	+	38365	BROX	ENSG00000162819.12_6	-0.027	0.0251357	SE
chr7	45143697	45143855	-	38417	TBRG4	ENSG00000136270.14_10	-0.067	1.1796e-06	SE
chr7	45144136	45144308	-	38418	TBRG4	ENSG00000136270.14_10	-0.061	1.02673e-07	SE
chr1	32100822	32101123	-	38439	PEF1	ENSG00000162517.13_6	-0.024	0.000804171	SE
chr1	33736087	33736213	+	38522	ZNF362	ENSG00000160094.15_7	-0.138	0.00531487	SE
chr2	192896057	192896329	+	38646	CAVIN2-AS1	ENSG00000233766.7_9	-0.15	0.0367176	SE
chr3	24338716	24338814	-	38731	THRB	ENSG00000151090.20_10	-0.484	0.0336141	SE
chr3	24338716	24338814	-	38732	THRB	ENSG00000151090.20_10	-0.641	0.000106399	SE
chr3	24525413	24525586	-	38748	THRB	ENSG00000151090.20_10	-0.136	0.0426794	SE
chr1	20501499	20501638	-	38756	PLA2G2C	ENSG00000187980.6_5	0.384	0.0516759	SE
chr6	8547349	8547447	+	38762	HULC	ENSG00000285219.2_5	-0.156	0.0601672	SE
chr6	8780119	8780240	+	38777	HULC	ENSG00000285219.2_5	-0.441	0.0534164	SE
chr16	3440422	3440517	-	38824	ZSCAN32	ENSG00000140987.20_7	0.178	0.00165149	SE
chr1	151237307	151237394	+	38838	PSMD4	ENSG00000159352.16_6	0.231	0.0448016	SE
chr2	223752547	223752606	+	38852	ACSL3	ENSG00000123983.14_5	0.02	0.0493974	SE
chr2	223765391	223765498	+	38853	ACSL3	ENSG00000123983.14_5	0.069	0.00387789	SE
chr1	154144504	154144580	-	38932	TPM3	ENSG00000143549.21_9	0.011	7.87758e-05	SE
chr10	102267181	102267324	-	38974	SEC31B	ENSG00000075826.17_7	0.095	0.0637556	SE
chr15	28544547	28544662	-	39055	HERC2	ENSG00000128731.18_8	-0.059	0.0235262	SE
chr1	75180262	75180314	-	39084	CRYZ	ENSG00000116791.14_7	-0.02	0.0412548	SE
chr4	83816844	83816927	-	39099	THAP9-AS1	ENSG00000251022.6_10	-0.093	0.07539	SE
chr4	83816844	83816927	-	39100	THAP9-AS1	ENSG00000251022.6_10	-0.219	0.00189796	SE
chr4	83819141	83819215	-	39102	THAP9-AS1	ENSG00000251022.6_10	-0.195	9.32764e-08	SE
chr1	43300708	43300825	+	39115	ERMAP	ENSG00000164010.15_10	-0.042	0.0418488	SE
chrX	13353330	13353431	+	39145	LINC01203	ENSG00000226985.7_7	0.069	0.0491292	SE
chrX	13353777	13353816	+	39147	LINC01203	ENSG00000226985.7_7	0.045	0.00657211	SE
chrX	13390367	13390591	+	39149	LINC01203	ENSG00000226985.7_7	-0.031	0.0140284	SE
chrX	13390486	13390591	+	39151	LINC01203	ENSG00000226985.7_7	-0.029	0.0247939	SE
chrX	13390486	13390591	+	39152	LINC01203	ENSG00000226985.7_7	0.178	0.0347244	SE
chrX	13393519	13393602	+	39156	LINC01203	ENSG00000226985.7_7	-0.091	0.0192861	SE
chr2	209169569	209169737	+	39225	PIKFYVE	ENSG00000115020.17_8	-0.104	0.0344786	SE
chr6	136588166	136588313	-	39246	BCLAF1	ENSG00000029363.17_10	0.085	1.82814e-08	SE
chr1	32266041	32266218	-	39255	SPOCD1	ENSG00000134668.12_7	-0.168	0.00772735	SE
chr2	238636518	238636578	+	39271	LRRFIP1	ENSG00000124831.19_7	-0.051	0.0817141	SE
chr2	238666098	238666191	+	39274	LRRFIP1	ENSG00000124831.19_7	0.324	0.0427489	SE
chr1	1191424	1191505	-	39280	UBE2J2	ENSG00000160087.21_9	-0.018	0.00705992	SE
chr1	1203112	1203372	-	39285	UBE2J2	ENSG00000160087.21_9	-0.059	0.0743518	SE
chr1	1203241	1203372	-	39287	UBE2J2	ENSG00000160087.21_9	-0.019	0.0407836	SE
chr4	175219116	175219213	+	39319	CEP44	ENSG00000164118.13_9	-0.049	0.0520546	SE
chr2	96604576	96604649	-	39362	ANKRD36C	ENSG00000174501.14_6	-0.238	0.076217	SE
chr13	113460526	113460607	+	39410	ATP11A	ENSG00000068650.18_6	-0.467	0.000534403	SE
chr4	40075074	40075171	+	39463	N4BP2	ENSG00000078177.14_6	0.116	0.000321007	SE
chr1	24125376	24125502	-	39533	GALE	ENSG00000117308.15_9	0.049	0.00972448	SE
chr6	159329765	159329927	+	39593	C6orf99	ENSG00000203711.14_9	0.17	0.0242239	SE
chr2	69709842	69709944	-	39641	AAK1	ENSG00000115977.19_8	0.22	0.0796531	SE
chr3	33450181	33450289	-	39661	UBP1	ENSG00000153560.12_7	0.124	3.56766e-05	SE
chr12	49765010	49765073	+	39674	SPATS2	ENSG00000123352.18_9	-0.454	0.00384512	SE
chr1	197581060	197581106	-	39693	DENND1B	ENSG00000213047.13_7	-0.113	0.0135478	SE
chr17	43344479	43344695	+	39755	MAP3K14-AS1	ENSG00000267278.6_8	0.074	1.44532e-05	SE
chr3	53153899	53154037	-	39766	RFT1	ENSG00000163933.10_9	0.027	0.00147146	SE
chr11	44094996	44095067	+	39777	ACCS	ENSG00000110455.14_8	-0.025	0.0768138	SE
chr1	33099245	33099328	-	39805	ZBTB8OS	ENSG00000176261.15_8	-0.102	0.0916666	SE
chr1	33099551	33099711	-	39821	ZBTB8OS	ENSG00000176261.15_8	-0.042	0.0544556	SE
chr1	33100302	33100393	-	39829	ZBTB8OS	ENSG00000176261.15_8	0.046	0.0437014	SE
chr4	1804640	1804791	+	39838	FGFR3	ENSG00000068078.19_7	0.108	0.0230047	SE
chr4	39779301	39779430	+	39884	UBE2K	ENSG00000078140.14_6	-0.011	0.00270454	SE
chr1	7846780	7846896	+	39894	PER3	ENSG00000049246.14_4	-0.088	0.0212286	SE
chr3	43756438	43756550	+	39933	ABHD5	ENSG00000011198.10_10	-0.021	2.40075e-06	SE
chr1	22828791	22828934	+	39962	ZBTB40	ENSG00000184677.18_7	0.028	0.0689303	SE
chr7	65599266	65599361	+	39988	CRCP	ENSG00000241258.7_6	-0.324	0.0257471	SE
chr8	82588468	82588514	-	40105	IMPA1	ENSG00000133731.10_6	0.035	0.00257354	SE
chr8	82597997	82598198	-	40112	IMPA1	ENSG00000133731.10_6	0.108	0.000180846	SE
chr16	48290520	48290652	+	40128	LONP2	ENSG00000102910.14_6	0.039	0.000921839	SE
chr19	50170275	50170418	+	40152	BCL2L12	ENSG00000126453.9_5	-0.075	3.8351e-09	SE
chr19	50170278	50170418	+	40154	BCL2L12	ENSG00000126453.9_5	-0.108	8.54593e-07	SE
chr9	130116124	130116223	+	40182	GARNL3	ENSG00000136895.19_10	-0.135	0.00925811	SE
chr1	151341479	151341665	-	40187	SELENBP1	ENSG00000143416.21_9	0.026	0.0019771	SE
chr1	151341917	151342030	-	40188	SELENBP1	ENSG00000143416.21_9	0.017	0.0424381	SE
chr15	72244042	72244237	-	40197	MYO9A	ENSG00000066933.16_8	-0.116	0.0667147	SE
chr15	72244117	72244237	-	40198	MYO9A	ENSG00000066933.16_8	-0.094	0.0229215	SE
chr5	65364704	65364848	+	40213	ERBIN	ENSG00000112851.14_7	0.039	0.00834819	SE
chr5	65370851	65371058	+	40216	ERBIN	ENSG00000112851.14_7	0.096	0.016412	SE
chr19	43015048	43015126	+	40250	LIPE-AS1	ENSG00000213904.9_8	0.805	3.78691e-06	SE
chr19	43026143	43026250	+	40255	LIPE-AS1	ENSG00000213904.9_8	0.211	0.000473258	SE
chrX	136084483	136084652	+	40353	AL390879.1	ENSG00000234062.8_9	0.256	0.0043589	SE
chr2	135960401	135960533	-	40369	ZRANB3	ENSG00000121988.18_7	-0.029	0.0334338	SE
chr12	131958851	131959003	-	40418	AC073578.1	ENSG00000256209.2_10	0.111	0.037178	SE
chr1	46034156	46034356	+	40496	AKR1A1	ENSG00000117448.13_7	0.037	1.01171e-05	SE
chr4	8372634	8372721	-	40498	ACOX3	ENSG00000087008.16_6	0.051	0.0822715	SE
chr1	111436948	111437023	+	40526	CD53	ENSG00000143119.14_6	-0.452	0.0604886	SE
chr1	111437581	111437677	+	40530	CD53	ENSG00000143119.14_6	-0.152	0.0739015	SE
chr1	111439274	111439355	+	40537	CD53	ENSG00000143119.14_6	0.038	3.94112e-06	SE
chr1	10494713	10494747	+	40548	CENPS-CORT	ENSG00000251503.8_8	0.05	0.0936113	SE
chr15	89055581	89056371	-	40638	AC013489.1	ENSG00000173867.10_10	-0.047	0.00252236	SE
chr1	179623335	179623497	+	40685	TDRD5	ENSG00000162782.16_8	-0.263	0.0439436	SE
chr2	12448813	12448910	+	40735	MIR3681HG	ENSG00000224184.6_7	-0.147	0.0168607	SE
chr2	12480343	12480427	+	40742	MIR3681HG	ENSG00000224184.6_7	-0.649	1.36565e-06	SE
chr2	12537647	12538496	+	40749	MIR3681HG	ENSG00000224184.6_7	-0.276	0.000787083	SE
chr17	61800657	61800686	-	40779	STRADA	ENSG00000266173.7_10	-0.119	0.076792	SE
chr3	73112823	73112898	+	40785	PPP4R2	ENSG00000163605.15_6	-0.018	0.0235262	SE
chr3	88175283	88175419	+	40793	ZNF654	ENSG00000175105.7_7	0.074	0.085525	SE
chrX	47582925	47583735	+	40831	CXXC1P1	ENSG00000187893.10_6	-0.185	0.0595292	SE
chr1	161137160	161137276	+	40900	PPOX	ENSG00000143224.18_8	-0.046	0.00395526	SE
chr1	161137784	161137917	+	40905	PPOX	ENSG00000143224.18_8	-0.109	8.12462e-05	SE
chr1	161140696	161140739	+	40941	PPOX	ENSG00000143224.18_8	-0.054	0.00206293	SE
chr2	102476104	102476326	+	40979	MAP4K4	ENSG00000071054.16_9	0.037	0.000338289	SE
chr2	102476197	102476326	+	40981	MAP4K4	ENSG00000071054.16_9	0.044	0.000253286	SE
chr2	102484490	102484499	+	40986	MAP4K4	ENSG00000071054.16_9	-0.095	0.000272172	SE
chr2	70148867	70148897	+	41112	MXD1	ENSG00000059728.11_6	-0.025	0.0282427	SE
chr7	50435703	50435763	+	41125	IKZF1	ENSG00000185811.19_9	-0.068	0.053192	SE
chr8	8887301	8887591	+	41226	ERI1	ENSG00000104626.15_5	0.017	0.0870779	SE
chr1	145497392	145497488	+	41232	LIX1L	ENSG00000271601.4_6	0.019	0.0183334	SE
chr10	70253205	70253327	-	41236	SLC25A16	ENSG00000122912.15_7	-0.044	0.0324475	SE
chr10	71921374	71921494	-	41312	SAR1A	ENSG00000079332.15_9	-0.016	0.000646191	SE
chr10	71921613	71921687	-	41313	SAR1A	ENSG00000079332.15_9	-0.065	1.39748e-06	SE
chr1	212502476	212502673	+	41316	PPP2R5A	ENSG00000066027.12_6	0.052	0.00162565	SE
chr1	212520688	212520748	+	41320	PPP2R5A	ENSG00000066027.12_6	-0.693	1.62158e-08	SE
chr3	172229406	172229449	-	41347	TNFSF10	ENSG00000121858.11_6	-0.116	0.071709	SE
chr3	139178772	139178827	+	41369	AC046134.2	ENSG00000248932.6_10	0.329	0.0256396	SE
chr19	1791969	1792134	-	41384	ATP8B3	ENSG00000130270.16_5	0.28	0.000519371	SE
chr19	1791999	1792134	-	41386	ATP8B3	ENSG00000130270.16_5	0.653	3.35314e-05	SE
chr1	156214372	156214463	-	41455	PAQR6	ENSG00000160781.17_7	-0.101	0.0611155	SE
chr12	56226654	56226798	+	41534	TMEM198B	ENSG00000182796.14_7	0.148	0.017219	SE
chr1	32497124	32497241	+	41540	KHDRBS1	ENSG00000121774.18_5	0.013	1.13876e-07	SE
chr1	101545944	101546169	+	41605	AC093157.1	ENSG00000233184.7_9	0.27	0.0198765	SE
chr19	7832401	7832514	+	41640	CLEC4M	ENSG00000104938.17_6	0.222	0.00212458	SE
chr7	98974956	98975062	+	41675	ARPC1B	ENSG00000130429.15_11	0.046	0.0812277	SE
chr1	78167053	78167156	-	41718	USP33	ENSG00000077254.14_7	0.017	0.0420573	SE
chr1	78180298	78180468	-	41721	USP33	ENSG00000077254.14_7	0.05	0.00120124	SE
chr1	78181426	78181553	-	41723	USP33	ENSG00000077254.14_7	0.054	0.00097047	SE
chr1	225147854	225148004	+	41744	DNAH14	ENSG00000185842.15_7	0.013	0.0114495	SE
chr1	225231587	225231685	+	41764	DNAH14	ENSG00000185842.15_7	0.476	0.000124013	SE
chr14	37153948	37154130	-	41813	SLC25A21	ENSG00000183032.12_7	0.026	0.0437014	SE
chr14	37283122	37283206	-	41819	SLC25A21	ENSG00000183032.12_7	-0.022	0.0862876	SE
chr16	28843816	28843888	+	41953	ATXN2L	ENSG00000168488.18_8	-0.011	0.000106675	SE
chr16	28847646	28847811	+	41961	ATXN2L	ENSG00000168488.18_8	-0.061	0.0273514	SE
chr3	37036320	37036444	+	41963	MLH1	ENSG00000076242.16_7	-0.082	0.0224088	SE
chr3	37083758	37083822	+	41995	MLH1	ENSG00000076242.16_7	-0.014	0.0178609	SE
chr3	37089009	37089174	+	42001	MLH1	ENSG00000076242.16_7	0.013	0.0184789	SE
chr19	10464203	10464322	-	42050	TYK2	ENSG00000105397.14_8	0.071	0.00875691	SE
chr6	34823393	34823480	+	42085	UHRF1BP1	ENSG00000065060.17_5	-0.021	0.0818498	SE
chr2	172803227	172803303	+	42093	HAT1	ENSG00000128708.13_6	0.013	0.00691353	SE
chr22	29684594	29684744	+	42183	EWSR1	ENSG00000182944.18_7	0.011	0.00247844	SE
chr22	29684594	29684775	+	42190	EWSR1	ENSG00000182944.18_7	0.01	0.0022876	SE
chr22	29687550	29687588	+	42195	EWSR1	ENSG00000182944.18_7	0.034	0.0134051	SE
chr22	29687553	29687588	+	42197	EWSR1	ENSG00000182944.18_7	0.034	0.0152338	SE
chr17	35783608	35783715	+	42225	TADA2A	ENSG00000276234.5_8	0.026	0.0824691	SE
chr3	178474867	178474921	-	42264	KCNMB2-AS1	ENSG00000237978.6_9	-0.154	0.006966	SE
chr3	178474867	178474924	-	42266	KCNMB2-AS1	ENSG00000237978.6_9	-0.139	0.00762168	SE
chr3	178519580	178519722	-	42269	KCNMB2-AS1	ENSG00000237978.6_9	-0.205	0.010131	SE
chr3	178519580	178519722	-	42271	KCNMB2-AS1	ENSG00000237978.6_9	0.218	0.0874315	SE
chr1	55203254	55203337	+	42292	TTC4	ENSG00000243725.7_6	0.018	0.0244214	SE
chr11	13466570	13466728	-	42300	BTBD10	ENSG00000148925.11_7	-0.191	0.00199691	SE
chr6	37613708	37613732	-	42325	MDGA1	ENSG00000112139.16_8	0.283	0.000440971	SE
chr6	37613973	37614151	-	42326	MDGA1	ENSG00000112139.16_8	0.213	0.00067466	SE
chr6	37613973	37614151	-	42327	MDGA1	ENSG00000112139.16_8	0.042	0.0691215	SE
chr2	27995540	27995559	+	42332	MRPL33	ENSG00000243147.8_6	-0.024	0.0715337	SE
chr2	27997290	27997397	+	42334	MRPL33	ENSG00000243147.8_6	0.062	0.062847	SE
chr1	145414692	145414878	+	42384	HJV	ENSG00000168509.20_7	-0.107	0.0579776	SE
chr6	28876584	28876617	-	42508	TRIM27	ENSG00000204713.11_6	-0.019	0.0783538	SE
chr2	183597225	183597269	+	42529	DNAJC10	ENSG00000077232.18_8	-0.028	0.0212201	SE
chr2	183600975	183601113	+	42531	DNAJC10	ENSG00000077232.18_8	-0.03	0.0712456	SE
chr2	183600975	183601113	+	42534	DNAJC10	ENSG00000077232.18_8	0.045	0.0186001	SE
chr2	44548965	44549039	-	42559	PREPL	ENSG00000138078.16_7	-0.017	0.0783186	SE
chr1	236706214	236706340	+	42765	LGALS8	ENSG00000116977.19_7	0.088	0.015518	SE
chr21	10969074	10969128	-	42771	TPTE	ENSG00000166157.12	0.175	0.0586646	SE
chr1	47154024	47154216	-	42814	EFCAB14	ENSG00000159658.13_7	-0.15	4.00627e-08	SE
chr11	59564755	59564869	+	42878	STX3	ENSG00000166900.17_7	-0.04	9.17515e-06	SE
chr16	46702841	46702964	-	42934	VPS35	ENSG00000069329.18_8	0.009	0.0379168	SE
chr1	10463127	10463193	+	43157	PGD	ENSG00000142657.21_6	0.005	0.0894178	SE
chr3	141713861	141713983	-	43212	TFDP2	ENSG00000114126.18_8	-0.064	0.000140945	SE
chr3	141724282	141724386	-	43217	TFDP2	ENSG00000114126.18_8	-0.024	0.022725	SE
chr2	96480418	96480539	-	43246	LINC00342	ENSG00000232931.6_9	-0.078	0.0977226	SE
chr1	206646538	206646657	+	43293	IKBKE	ENSG00000263528.8_5	-0.074	0.0514717	SE
chr1	206666598	206666711	+	43296	IKBKE	ENSG00000263528.8_5	0.198	0.0369446	SE
chr1	206667252	206667324	+	43297	IKBKE	ENSG00000263528.8_5	0.152	0.0431153	SE
chr1	156524026	156524184	-	43311	IQGAP3	ENSG00000183856.11_6	0.049	0.0221034	SE
chr7	99950186	99950290	+	43327	STAG3L5P-PVRIG2P-PILRB	ENSG00000272752.6_4	-0.389	0.0180827	SE
chr6	41908107	41908323	-	43427	CCND3	ENSG00000112576.13_6	0.014	0.0168298	SE
chr6	13961710	13961793	+	43434	RNF182	ENSG00000180537.13_9	0.146	0.0973281	SE
chr5	118807330	118807395	+	43448	HSD17B4	ENSG00000133835.17_7	0.026	0.0176055	SE
chr1	39898719	39898827	+	43500	MACF1	ENSG00000127603.29_11	0.02	0.072489	SE
chr1	24105927	24105971	+	43524	PITHD1	ENSG00000057757.10_8	-0.019	0.0323936	SE
chr1	100588765	100588845	-	43631	SASS6	ENSG00000156876.10_7	-0.035	0.0963347	SE
chr12	48360465	48360515	+	43698	TMEM106C	ENSG00000134291.12_6	-0.47	0.00614903	SE
chr6	2969012	2969147	-	43728	SERPINB6	ENSG00000124570.21_8	-0.194	0.000959161	SE
chr6	2969012	2969147	-	43729	SERPINB6	ENSG00000124570.21_8	-0.118	0.0237178	SE
chr6	2969012	2969147	-	43731	SERPINB6	ENSG00000124570.21_8	-0.097	0.00245653	SE
chr6	2969012	2969336	-	43734	SERPINB6	ENSG00000124570.21_8	-0.096	0.063904	SE
chr1	93599259	93599365	+	43750	MTF2	ENSG00000143033.18_5	-0.055	0.0387133	SE
chr1	110172417	110172538	+	43802	AMPD2	ENSG00000116337.19_11	-0.021	0.0206981	SE
chr2	171590388	171590504	-	43823	AC007405.1	ENSG00000234350.5_11	-0.28	0.072083	SE
chr12	3126563	3126692	+	43833	TEAD4	ENSG00000197905.9_10	0.098	0.00389702	SE
chr9	115092720	115092754	-	43914	PTBP3	ENSG00000119314.16_7	-0.348	0.0103941	SE
chr9	115092720	115092754	-	43915	PTBP3	ENSG00000119314.16_7	-0.038	3.21604e-05	SE
chr12	51442816	51442968	+	43927	LETMD1	ENSG00000050426.16_9	-0.01	0.0627802	SE
chr12	51449617	51449804	+	43940	LETMD1	ENSG00000050426.16_9	-0.031	0.0637102	SE
chr12	51449926	51450028	+	43948	LETMD1	ENSG00000050426.16_9	-0.022	0.009652	SE
chr9	3301545	3301620	-	43987	RFX3	ENSG00000080298.15_8	-0.204	0.00886893	SE
chr5	124233448	124233506	+	44009	LINC02240	ENSG00000260192.3_8	0.322	0.00438292	SE
chr5	124377849	124377932	+	44022	LINC02240	ENSG00000260192.3_8	0.543	0.00295615	SE
chr14	77934425	77934527	+	44044	AHSA1	ENSG00000100591.8_7	-0.069	0.0573706	SE
chr8	23116578	23116639	+	44086	CHMP7	ENSG00000147457.14_6	-0.033	0.0536406	SE
chr5	132113367	132113586	-	44202	SEPTIN8	ENSG00000164402.14_11	0.503	0.0018524	SE
chr1	47040618	47040692	-	44221	MKNK1	ENSG00000079277.22_11	-0.015	0.0423771	SE
chr1	113247674	113247790	-	44270	RHOC	ENSG00000155366.17_8	0.091	0.00141204	SE
chr1	113247721	113247745	-	44271	RHOC	ENSG00000155366.17_8	0.141	0.000966527	SE
chr1	113247721	113247790	-	44272	RHOC	ENSG00000155366.17_8	0.108	0.000211477	SE
chr2	275139	275201	+	44284	ACP1	ENSG00000143727.16_5	-0.022	0.010273	SE
chr8	95746857	95746982	+	44369	DPY19L4	ENSG00000156162.16_5	0.029	0.097121	SE
chr11	71502784	71502865	+	44455	FAM86C1P	ENSG00000158483.17_7	0.369	0.000545982	SE
chr6	29977502	29977608	-	44470	ZNRD1ASP	ENSG00000204623.9_10	0.154	0.0826286	SE
chr5	881221	881297	-	44490	BRD9	ENSG00000028310.18_7	0.081	0.0876704	SE
chr5	884052	884185	-	44491	BRD9	ENSG00000028310.18_7	0.043	0.0228057	SE
chr1	24137225	24137289	-	44534	HMGCL	ENSG00000117305.15_8	-0.107	0.00726388	SE
chr1	24140679	24140828	-	44535	HMGCL	ENSG00000117305.15_8	-0.063	0.000890614	SE
chr1	172554997	172555088	+	44564	SUCO	ENSG00000094975.14_6	0.059	0.048928	SE
chr7	99117449	99117532	+	44594	ZKSCAN5	ENSG00000196652.12_3	0.112	0.0218196	SE
chr1	14717181	14717240	-	44615	KAZN-AS1	ENSG00000234593.3_9	0.08	0.0620578	SE
chr1	14717181	14717247	-	44618	KAZN-AS1	ENSG00000234593.3_9	0.034	0.0674403	SE
chr1	14735901	14735947	-	44626	KAZN-AS1	ENSG00000234593.3_9	0.09	0.000384468	SE
chr1	28835341	28835413	+	44751	RCC1	ENSG00000180198.16_7	-0.121	0.0579193	SE
chr11	9806138	9806323	+	44792	SBF2-AS1	ENSG00000246273.8_8	0.272	0.0396477	SE
chr6	97561658	97562385	+	44808	KLHL32	ENSG00000186231.17_5	-0.075	0.0246804	SE
chr19	58145390	58145429	+	44812	ZNF211	ENSG00000121417.14_6	-0.149	0.0604616	SE
chr19	58151279	58151435	+	44814	ZNF211	ENSG00000121417.14_6	0.187	0.00234548	SE
chr4	139103450	139103547	-	44822	SLC7A11	ENSG00000151012.13_6	-0.06	0.000761806	SE
chr1	3654786	3655077	-	44837	TP73-AS1	ENSG00000227372.12_9	0.032	0.00506038	SE
chr19	54691042	54691169	-	44993	MBOAT7	ENSG00000125505.17_8	0.023	0.0343695	SE
chr2	97533514	97533660	-	45023	SEMA4C	ENSG00000168758.11_7	-0.083	0.0660872	SE
chr2	241421599	241421678	-	45055	ANKMY1	ENSG00000144504.15_8	0.278	0.0233221	SE
chr2	241468453	241468926	-	45073	ANKMY1	ENSG00000144504.15_8	-0.179	0.0235262	SE
chr2	241468453	241468926	-	45074	ANKMY1	ENSG00000144504.15_8	-0.125	0.000537418	SE
chr7	35006505	35006583	-	45088	DPY19L1	ENSG00000173852.15_7	0.219	0.0728762	SE
chr11	63986995	63987130	+	45114	FERMT3	ENSG00000149781.12_6	0.014	0.0259255	SE
chr11	66133901	66134035	-	45122	SLC29A2	ENSG00000174669.12_6	-0.026	0.00792878	SE
chrX	65824262	65824348	-	45134	EDA2R	ENSG00000131080.15_7	0.482	4.96582e-05	SE
chr15	74283155	74283286	-	45140	STOML1	ENSG00000067221.14_9	0.141	0.0265829	SE
chr22	41360050	41360121	+	45148	RBX1	ENSG00000100387.9_5	-0.13	0.0118192	SE
chr17	5329555	5329619	+	45187	RPAIN	ENSG00000129197.14_4	-0.024	0.0439436	SE
chr6	65146066	65146158	-	45252	EYS	ENSG00000188107.15_7	0.097	0.00707628	SE
chr5	59894901	59895087	-	45296	DEPDC1B	ENSG00000035499.13_6	0.029	0.0527614	SE
chr5	59938638	59938686	-	45301	DEPDC1B	ENSG00000035499.13_6	-0.387	0.00408287	SE
chr4	128859937	128859991	-	45316	MFSD8	ENSG00000164073.11_8	0.082	0.061171	SE
chr5	304291	304336	+	45365	PDCD6	ENSG00000249915.8_6	0.023	0.0514728	SE
chr5	306716	306869	+	45366	PDCD6	ENSG00000249915.8_6	0.016	0.0438271	SE
chr5	306716	306869	+	45367	PDCD6	ENSG00000249915.8_6	0.016	0.0427619	SE
chr5	306716	306869	+	45368	PDCD6	ENSG00000249915.8_6	0.043	0	SE
chr5	306716	306875	+	45371	PDCD6	ENSG00000249915.8_6	0.015	0.047667	SE
chr5	306716	306875	+	45372	PDCD6	ENSG00000249915.8_6	0.029	0	SE
chr6	167347578	167347624	-	45443	RNASET2	ENSG00000026297.16_9	-0.013	0.0380245	SE
chr1	160253319	160253429	-	45496	PEX19	ENSG00000162735.19_6	0.056	5.11805e-07	SE
chr2	47399552	47399598	-	45502	CALM2	ENSG00000143933.19_8	-0.014	7.90729e-10	SE
chr18	77132824	77132882	+	45566	ATP9B	ENSG00000166377.20_8	-0.069	0.0164374	SE
chr1	246719874	246720023	-	45596	TFB2M	ENSG00000162851.8_6	-0.034	0.0746589	SE
chr2	86668394	86668567	+	45638	KDM3A	ENSG00000115548.17_6	0.12	0.00876698	SE
chr22	22322990	22323147	-	45658	TOP3B	ENSG00000100038.20_8	0.011	0.0428526	SE
chr22	22324581	22324778	-	45660	TOP3B	ENSG00000100038.20_8	0.024	0.0111253	SE
chr22	22324581	22324778	-	45661	TOP3B	ENSG00000100038.20_8	0.022	0.00316448	SE
chr12	56093653	56093773	-	45679	ITGA7	ENSG00000135424.18_7	0.065	0.0738364	SE
chr5	138650363	138650425	+	45706	MATR3	ENSG00000015479.20_9	-0.052	0.00424133	SE
chr7	23401152	23401216	-	45720	IGF2BP3	ENSG00000136231.14_6	-0.025	0.0366171	SE
chr7	23401152	23401216	-	45721	IGF2BP3	ENSG00000136231.14_6	-0.02	0.0982613	SE
chr7	23458394	23458443	-	45724	IGF2BP3	ENSG00000136231.14_6	-0.041	0.0396469	SE
chr2	27351308	27351469	+	45741	ABHD1	ENSG00000143994.14_6	-0.265	0.0119779	SE
chr1	36773709	36773810	+	45757	SH3D21	ENSG00000214193.11_10	-0.137	0.0372021	SE
chr3	65433696	65433732	-	45903	MAGI1	ENSG00000151276.23_6	-0.203	0.00383695	SE
chr9	131848417	131848546	+	45959	DOLPP1	ENSG00000167130.18_7	-0.048	0.00412217	SE
chr10	72136207	72136352	-	45967	LRRC20	ENSG00000172731.14_7	0.052	0.0664345	SE
chr3	46724619	46724816	-	45978	ALS2CL	ENSG00000178038.17_6	0.294	0.02307	SE
chr2	208598670	208598771	+	46019	CCNYL1	ENSG00000163249.13_8	-0.084	0.0502482	SE
chr1	95709766	95710254	+	46091	RWDD3	ENSG00000122481.17_6	0.046	0.0651213	SE
chr1	95709766	95710271	+	46093	RWDD3	ENSG00000122481.17_6	0.049	0.0555179	SE
chr1	70652947	70653021	-	46150	LRRC40	ENSG00000066557.6_6	0.038	0.0497157	SE
chr10	64975312	64975456	-	46240	JMJD1C	ENSG00000171988.19_8	0.039	0.00219265	SE
chr6	119147309	119147455	-	46258	MCM9	ENSG00000111877.17_6	-0.069	0.0279412	SE
chr6	119234459	119234585	-	46261	MCM9	ENSG00000111877.17_6	0.034	0.0446899	SE
chr4	40937093	40937156	-	46355	APBB2	ENSG00000163697.17_8	0.107	0.0489383	SE
chr1	44463526	44463697	-	46377	SLC6A9	ENSG00000196517.13_9	-0.024	0.044031	SE
chr22	45566868	45567058	+	46529	NUP50	ENSG00000093000.19_6	0.08	0.0631391	SE
chr20	51293558	51293647	+	46570	AL031674.1	ENSG00000232294.6_8	0.508	0.000788167	SE
chr20	51297943	51298089	+	46571	AL031674.1	ENSG00000232294.6_8	0.197	0.0216242	SE
chr1	35558920	35559042	+	46657	ZMYM1	ENSG00000197056.11_6	-0.223	0.0039241	SE
chr1	35558994	35559042	+	46659	ZMYM1	ENSG00000197056.11_6	-0.248	0.0119286	SE
chr1	35907846	35907937	-	46705	KIAA0319L	ENSG00000142687.18_7	0.028	3.90782e-06	SE
chr1	212148507	212148714	-	46845	INTS7	ENSG00000143493.13_7	0.017	0.0743651	SE
chr1	180805657	180805852	+	46893	XPR1	ENSG00000143324.14_6	0.015	0.0345886	SE
chr1	247005995	247006078	-	46942	AHCTF1	ENSG00000153207.16_7	-0.046	0.0128524	SE
chr1	247007096	247007230	-	46943	AHCTF1	ENSG00000153207.16_7	-0.063	0.00273764	SE
chr8	74621266	74621397	-	46998	STAU2	ENSG00000040341.18_10	-0.101	0.0329843	SE
chr8	74651990	74652103	-	47010	STAU2	ENSG00000040341.18_10	0.034	0.00275295	SE
chr1	183516237	183516387	+	47069	SMG7	ENSG00000116698.21_7	0.06	0.00657039	SE
chr7	819589	819781	+	47083	DNAAF5	ENSG00000164818.16_8	-0.015	0.0560823	SE
chr2	97285408	97285499	-	47096	KANSL3	ENSG00000114982.19_8	-0.058	0.0022157	SE
chr3	13663274	13663415	+	47104	FBLN2	ENSG00000163520.14_7	0.303	0.098455	SE
chr3	13667944	13668079	+	47105	FBLN2	ENSG00000163520.14_7	0.131	0.0007639	SE
chr4	103554407	103554630	-	47110	MANBA	ENSG00000109323.11_10	-0.041	0.0190345	SE
chr4	667700	667755	-	47125	ATP5ME	ENSG00000169020.10_7	0.014	0.0170673	SE
chr1	155194667	155194878	-	47143	GBAP1	ENSG00000160766.14_5	-0.12	0.033932	SE
chr3	37327504	37327552	+	47312	GOLGA4	ENSG00000144674.16_8	-0.133	0.0278094	SE
chr3	37330725	37330780	+	47313	GOLGA4	ENSG00000144674.16_8	-0.191	0.0533219	SE
chr1	45120611	45120881	-	47367	TMEM53	ENSG00000126106.14_6	-0.247	0.0705747	SE
chr1	45125845	45125967	-	47369	TMEM53	ENSG00000126106.14_6	0.066	0.0433976	SE
chr3	154859779	154859916	+	47432	MME	ENSG00000196549.12_7	-0.131	4.8523e-07	SE
chr3	154860025	154860119	+	47433	MME	ENSG00000196549.12_7	-0.098	2.37776e-05	SE
chr20	30154012	30154098	+	47670	HM13	ENSG00000101294.18_7	-0.015	0.0186001	SE
chr20	30155880	30156083	+	47673	HM13	ENSG00000101294.18_7	-0.203	0.0570912	SE
chr2	179291092	179291232	+	47711	CHROMR	ENSG00000223960.7_10	0.035	0.0113898	SE
chr2	179291092	179291388	+	47714	CHROMR	ENSG00000223960.7_10	0.028	0.0333965	SE
chr2	179291092	179291407	+	47717	CHROMR	ENSG00000223960.7_10	0.028	0.0337264	SE
chr1	41189360	41189464	+	47725	NFYC	ENSG00000066136.20_5	0.014	0.0785031	SE
chr1	46956315	46956455	+	47779	DMBX1	ENSG00000197587.11_6	0.133	0.0759734	SE
chr19	1371232	1371389	+	47841	PWWP3A	ENSG00000160953.16_6	-0.04	0.0411723	SE
chr1	43426119	43426222	-	47952	AC099795.1	ENSG00000283973.2_8	-0.564	0.0305327	SE
chr2	145182362	145182431	-	48039	ZEB2	ENSG00000169554.22_9	-0.088	0.07869	SE
chr2	145182362	145182434	-	48041	ZEB2	ENSG00000169554.22_9	-0.043	0.0398845	SE
chr1	153517945	153517994	-	48203	S100A4	ENSG00000196154.12_7	-0.016	0.0832968	SE
chr1	94341200	94341339	-	48205	DNTTIP2	ENSG00000067334.14_7	-0.02	0.0124294	SE
chr1	1588705	1588752	-	48224	CDK11B	ENSG00000248333.8_6	-0.096	0.0996006	SE
chr1	45508890	45509067	-	48258	ZSWIM5	ENSG00000162415.7_7	0.111	0.0607543	SE
chr8	17782221	17782289	+	48344	PCM1	ENSG00000078674.18_6	0.041	0.0108996	SE
chr1	108826861	108826973	+	48370	SLC25A24P1	ENSG00000241361.8_6	0.157	0.00925174	SE
chr19	46119718	46119816	-	48382	EML2	ENSG00000125746.17_11	0.029	0.00111554	SE
chr3	48338216	48338319	-	48437	NME6	ENSG00000172113.9_7	-0.067	0.0489155	SE
chr3	48341920	48342124	-	48441	NME6	ENSG00000172113.9_7	0.142	0.0898247	SE
chr20	34243123	34243266	-	48462	CPNE1	ENSG00000214078.12_10	-0.043	0.00154155	SE
chr3	48019354	48019423	-	48492	MAP4	ENSG00000047849.21_10	0.026	0.000534403	SE
chr5	96062497	96062563	+	48509	CAST	ENSG00000153113.24_9	-0.015	0.0159736	SE
chr5	96064856	96064913	+	48516	CAST	ENSG00000153113.24_9	-0.05	0.085988	SE
chr4	17806729	17806848	-	48541	DCAF16	ENSG00000163257.11_6	0.231	0	SE
chr11	43913590	43913679	+	48559	ALKBH3	ENSG00000166199.13_6	0.037	0.0500399	SE
chr11	43923065	43923275	+	48560	ALKBH3	ENSG00000166199.13_6	0.018	0.0878621	SE
chr3	146246400	146246618	-	48662	PLSCR1	ENSG00000188313.13_8	-0.036	0.00864035	SE
chr9	71864290	71864401	+	48707	TJP2	ENSG00000119139.21_10	-0.047	0.00067466	SE
chr9	71864290	71864401	+	48708	TJP2	ENSG00000119139.21_10	-0.153	0.0576509	SE
chr9	71865950	71866280	+	48709	TJP2	ENSG00000119139.21_10	-0.032	0.00652604	SE
chr7	18668972	18669104	+	48734	HDAC9	ENSG00000048052.21_8	-0.21	0.0289345	SE
chr12	27523061	27523163	+	48748	ARNTL2	ENSG00000029153.14_8	0.269	0.000723901	SE
chr12	27540160	27540253	+	48753	ARNTL2	ENSG00000029153.14_8	-0.113	0.0022921	SE
chr12	27542111	27542229	+	48754	ARNTL2	ENSG00000029153.14_8	-0.052	0.0484938	SE
chr1	52221991	52222030	+	48793	OSBPL9	ENSG00000117859.19_10	0.071	0.00106363	SE
chr2	15768920	15768963	+	48848	DDX1	ENSG00000079785.15_7	0.033	0.048569	SE
chr11	65788034	65788098	-	48857	CATSPER1	ENSG00000175294.6_6	0.205	0.0077189	SE
chr1	15831105	15831253	-	48890	CASP9	ENSG00000132906.18_9	0.059	0.030869	SE
chr5	179007947	179008013	+	48913	RUFY1	ENSG00000176783.15_9	-0.034	0.0471524	SE
chr2	231254633	231254738	+	48942	SP140L	ENSG00000185404.16_4	0.148	0.0118803	SE
chr3	15674097	15674373	+	48971	BTD	ENSG00000169814.16_9	-0.115	0.0178713	SE
chr3	15674097	15674373	+	48972	BTD	ENSG00000169814.16_9	-0.286	0.0841227	SE
chr4	76446945	76447071	+	49002	THAP6	ENSG00000174796.12_7	0.034	0.0828128	SE
chr1	59507843	59507902	+	49088	LINC01358	ENSG00000237352.4_8	0.139	0.0253878	SE
chr2	97845597	97845670	+	49168	ANKRD36	ENSG00000135976.20_9	0.167	0.000216735	SE
chr2	97869927	97870000	+	49173	ANKRD36	ENSG00000135976.20_9	0.06	0.0908586	SE
chr6	30209923	30210088	-	49182	HCG17	ENSG00000270604.5_7	-0.154	0.0205394	SE
chr4	110619455	110619498	-	49227	CASP6	ENSG00000138794.10_6	-0.067	0.00685956	SE
chr3	141905035	141905109	-	49277	GK5	ENSG00000175066.16_7	0.254	2.04506e-09	SE
chr3	52005475	52005714	-	49281	ABHD14B	ENSG00000114779.19_8	-0.03	0.0433055	SE
chr3	52005475	52005908	-	49282	ABHD14B	ENSG00000114779.19_8	-0.03	0.00334132	SE
chr3	52005827	52005908	-	49283	ABHD14B	ENSG00000114779.19_8	-0.182	0.00481882	SE
chr2	114355974	114356043	+	49343	WASH2P	ENSG00000146556.14_4	-0.035	0.0119572	SE
chr9	100056228	100056392	+	49377	STRA6LP	ENSG00000255036.6_10	0.162	0.0935083	SE
chr17	1419181	1419412	-	49404	INPP5K	ENSG00000132376.20_7	-0.233	0.0666091	SE
chr1	59787207	59787422	+	49435	FGGY	ENSG00000172456.18_6	-0.05	0.00543507	SE
chr1	60106951	60107023	+	49450	FGGY	ENSG00000172456.18_6	-0.032	0.0445769	SE
chr1	60132954	60133075	+	49452	FGGY	ENSG00000172456.18_6	0.042	0.00400974	SE
chr10	86198267	86198463	+	49504	CCSER2	ENSG00000107771.17_7	-0.058	0.044061	SE
chr5	131562778	131562914	-	49518	P4HA2	ENSG00000072682.18_9	0.133	0.00101556	SE
chr5	131562778	131562951	-	49520	P4HA2	ENSG00000072682.18_9	0.127	0.000780079	SE
chr3	12558109	12558160	+	49554	TSEN2	ENSG00000154743.18_8	-0.043	0.0729503	SE
chr1	47691114	47691561	-	49563	TAL1	ENSG00000162367.11_5	0.08	0.0216929	SE
chr2	178386056	178386096	+	49616	AGPS	ENSG00000018510.16_9	-0.028	0.0452043	SE
chr5	102522020	102522140	+	49682	PPIP5K2	ENSG00000145725.20_6	-0.121	0.0030891	SE
chr5	179134132	179134191	+	49696	CANX	ENSG00000127022.15_9	0.542	0.00575145	SE
chr1	39333233	39333282	-	49715	MYCBP	ENSG00000214114.9_7	0.358	0	SE
chr6	53156573	53156761	-	49764	ELOVL5	ENSG00000012660.14_7	-0.009	0.0868046	SE
chr2	242029394	242029459	-	49774	MTERF4	ENSG00000122085.17_7	0.038	0.0367176	SE
chr2	242029717	242029864	-	49778	MTERF4	ENSG00000122085.17_7	0.467	0.00623511	SE
chr2	242033691	242033847	-	49781	MTERF4	ENSG00000122085.17_7	0.062	0.0499697	SE
chr2	242034544	242035853	-	49786	MTERF4	ENSG00000122085.17_7	0.054	0.0167177	SE
chr2	242036657	242036842	-	49791	MTERF4	ENSG00000122085.17_7	0.057	0.0569178	SE
chr2	242038810	242039309	-	49794	MTERF4	ENSG00000122085.17_7	0.037	0.0414945	SE
chr1	171481170	171481339	+	49796	PRRC2C	ENSG00000117523.16_9	-0.015	0.00955075	SE
chr3	172473272	172473365	+	49872	ECT2	ENSG00000114346.13_7	-0.404	0	SE
chr3	172477945	172478053	+	49879	ECT2	ENSG00000114346.13_7	-0.04	0.00463422	SE
chr7	135801818	135801936	+	49890	AC078845.1	ENSG00000232053.7_10	-0.082	0.0312568	SE
chr7	135861999	135862161	+	49891	AC078845.1	ENSG00000232053.7_10	-0.037	0.00152642	SE
chr7	135861999	135862161	+	49892	AC078845.1	ENSG00000232053.7_10	-0.014	0.00236832	SE
chr7	135926897	135927119	+	49897	AC078845.1	ENSG00000232053.7_10	-0.022	0.000391156	SE
chr7	136090017	136090064	+	49907	AC078845.1	ENSG00000232053.7_10	0.103	0.0881197	SE
chr7	136112142	136112268	+	49910	AC078845.1	ENSG00000232053.7_10	0.07	0.0315851	SE
chr2	220093155	220093207	-	49922	ATG9A	ENSG00000198925.12_9	-0.124	0.0287488	SE
chr3	176816253	176816329	-	49949	TBL1XR1	ENSG00000177565.18_6	-0.08	0.0384348	SE
chr10	11308560	11308640	+	49957	CELF2	ENSG00000048740.18_7	-0.044	0.0712391	SE
chr6	33173416	33173502	+	50051	HSD17B8	ENSG00000204228.4_5	-0.365	0.0107247	SE
chr14	96128816	96129001	+	50064	TCL6	ENSG00000187621.15_6	-0.489	0.0109974	SE
chr2	189051712	189051780	-	50107	LINC01090	ENSG00000231689.2_9	-0.396	0.0827537	SE
chr4	85070371	85070409	-	50140	AC079160.1	ENSG00000250546.6_9	-0.328	0.010445	SE
chr3	9979245	9979356	+	50182	AC018809.3	ENSG00000288550.1_3	0.058	0.000589027	SE
chr2	30371110	30371171	+	50217	YPEL5	ENSG00000119801.13_5	0.162	0.0975687	SE
chr2	30371110	30371171	+	50218	YPEL5	ENSG00000119801.13_5	0.071	5.46173e-07	SE
chr2	30371110	30371407	+	50220	YPEL5	ENSG00000119801.13_5	0.162	1.59791e-11	SE
chr2	30378715	30378776	+	50222	YPEL5	ENSG00000119801.13_5	0.039	0.0186769	SE
chr7	44799749	44799827	+	50245	ZMIZ2	ENSG00000122515.15_7	0.246	0.0106272	SE
chr9	86588816	86588888	-	50261	HNRNPK	ENSG00000165119.21_8	0.014	0.00180855	SE
chr9	117228546	117228672	-	50327	WHRN	ENSG00000095397.16_9	0.034	0.0587632	SE
chr5	43298110	43298236	-	50408	HMGCS1	ENSG00000112972.15_9	-0.026	0	SE
chr11	112041345	112041397	+	50500	AP002884.2	ENSG00000255292.9_7	0.26	0.0513344	SE
chr4	140217485	140217521	-	50541	NDUFC1	ENSG00000109390.13_7	-0.106	0.00053834	SE
chr4	140218538	140218597	-	50544	NDUFC1	ENSG00000109390.13_7	-0.082	0.00626654	SE
chr4	140218538	140218597	-	50545	NDUFC1	ENSG00000109390.13_7	0.292	0.0150934	SE
chr4	140218538	140218597	-	50547	NDUFC1	ENSG00000109390.13_7	0.235	0.0199037	SE
chr9	32987757	32987844	-	50562	APTX	ENSG00000137074.20_8	-0.156	0.00707212	SE
chr2	27315199	27315316	+	50597	KHK	ENSG00000138030.13_6	0.172	0.00255882	SE
chr6	17790102	17790141	-	50656	KIF13A	ENSG00000137177.20_7	0.127	0.0301497	SE
chr6	17794479	17794626	-	50658	KIF13A	ENSG00000137177.20_7	-0.044	0.0388444	SE
chr5	53636022	53636139	+	50742	LINC01033	ENSG00000249069.8_8	-0.159	0.0647408	SE
chr5	53636022	53636139	+	50744	LINC01033	ENSG00000249069.8_8	-0.044	0.00183421	SE
chr5	53636022	53636139	+	50745	LINC01033	ENSG00000249069.8_8	-0.093	5.14063e-05	SE
chr5	53691178	53691247	+	50751	LINC01033	ENSG00000249069.8_8	0.437	0.0028527	SE
chr5	53692826	53692964	+	50760	LINC01033	ENSG00000249069.8_8	-0.078	0.0509118	SE
chr1	89426849	89426970	-	50799	KYAT3	ENSG00000137944.18_9	-0.021	0.016696	SE
chr19	19014076	19014232	-	50854	COPE	ENSG00000105669.14_7	-0.019	0.0968102	SE
chr19	37063234	37063294	-	50878	ZNF529	ENSG00000186020.13_9	0.063	0.0423868	SE
chr16	20818273	20818413	+	50938	REXO5	ENSG00000005189.19_7	0.03	0.00749083	SE
chr3	44974398	44974482	-	51021	ZDHHC3	ENSG00000163812.15_8	0.077	0.0362186	SE
chr1	100206348	100206496	-	51051	FRRS1	ENSG00000156869.14_8	-0.019	0.0179135	SE
chr1	173833621	173833644	-	51069	GAS5	ENSG00000234741.8_10	0.007	0.0413181	SE
chr1	173833621	173833644	-	51070	GAS5	ENSG00000234741.8_10	-0.012	0.000170643	SE
chr1	173833812	173833842	-	51081	GAS5	ENSG00000234741.8_10	-0.115	0.00578916	SE
chr1	173833812	173833842	-	51082	GAS5	ENSG00000234741.8_10	-0.088	0.0657083	SE
chr1	173834647	173834685	-	51138	GAS5	ENSG00000234741.8_10	-0.218	0.070152	SE
chr1	173835314	173835344	-	51168	GAS5	ENSG00000234741.8_10	-0.447	0.065116	SE
chr1	173835314	173835344	-	51177	GAS5	ENSG00000234741.8_10	-0.247	0.0896494	SE
chr12	70206557	70206657	+	51282	RAB3IP	ENSG00000127328.22_5	0.07	0.0095691	SE
chr5	1579391	1579599	-	51331	SDHAP3	ENSG00000185986.12_7	-0.106	0.0635025	SE
chr5	1585098	1585248	-	51334	SDHAP3	ENSG00000185986.12_7	0.029	0.0437152	SE
chr1	38450378	38450451	-	51421	SF3A3	ENSG00000183431.12_6	0.667	0.0403289	SE
chr4	48504844	48504862	-	51446	FRYL	ENSG00000075539.15_7	0.083	0.0547791	SE
chr4	48551489	48551640	-	51452	FRYL	ENSG00000075539.15_7	-0.068	0.0116821	SE
chr4	48712535	48712715	-	51461	FRYL	ENSG00000075539.15_7	0.102	0.0199236	SE
chr16	27231713	27231806	+	51523	KDM8	ENSG00000155666.12_6	-0.078	0.0576875	SE
chrX	77157240	77157364	+	51528	COX7B	ENSG00000131174.7_8	0.006	0.0649187	SE
chr5	127474515	127474600	+	51625	SLC12A2	ENSG00000064651.14_6	-0.055	0.0380939	SE
chr1	229657338	229657382	-	51631	ABCB10	ENSG00000135776.5_6	-0.019	0.011322	SE
chr19	19605102	19605192	+	51776	GATAD2A	ENSG00000167491.17_7	-0.017	0.0315851	SE
chr4	164775172	164775321	-	51791	MARCHF1	ENSG00000145416.13_8	-0.05	0.042349	SE
chr2	148695714	148695782	-	52027	ORC4	ENSG00000115947.14_6	-0.042	0.00608498	SE
chr2	233568133	233568199	+	52057	GIGYF2	ENSG00000204120.15_9	0.09	0.00213779	SE
chr2	233599126	233599196	+	52058	GIGYF2	ENSG00000204120.15_9	0.245	0.00859793	SE
chr4	140527513	140527610	-	52102	SETD7	ENSG00000145391.13_6	0.329	0.0015635	SE
chr5	167915157	167915275	+	52133	RARS1	ENSG00000113643.9_6	0.069	3.97008e-10	SE
chr1	227058962	227059105	+	52196	PSEN2	ENSG00000143801.17_9	0.037	0.012463	SE
chr8	64085211	64085357	+	52265	YTHDF3	ENSG00000185728.17_9	-0.059	0.0686034	SE
chr2	55539569	55539715	-	52298	CCDC88A	ENSG00000115355.17_7	0.031	0.0217582	SE
chr6	155063089	155063152	+	52315	SCAF8	ENSG00000213079.10_6	0.114	0.00559261	SE
chr3	136287606	136287703	-	52346	STAG1	ENSG00000118007.13_7	0.045	0.0762056	SE
chr1	244852550	244852644	+	52391	DESI2	ENSG00000121644.19_5	-0.043	0.0225312	SE
chr4	123147861	123147990	+	52397	KIAA1109	ENSG00000138688.15_5	0.096	0.011995	SE
chr1	6601889	6601987	-	52409	NOL9	ENSG00000162408.11_6	-0.049	0.0534056	SE
chr1	6601889	6601987	-	52410	NOL9	ENSG00000162408.11_6	-0.176	3.36555e-06	SE
chr1	6605104	6605240	-	52414	NOL9	ENSG00000162408.11_6	-0.096	0.000821708	SE
chr20	17949017	17949100	-	52476	SNX5	ENSG00000089006.16_6	-0.06	0.0604616	SE
chr17	66511127	66511260	+	52488	PRKAR1A	ENSG00000108946.15_7	-0.214	0.00205532	SE
chr3	52156394	52156493	-	52578	POC1A	ENSG00000164087.8_8	0.026	0.0484554	SE
chr9	95624421	95624447	-	52599	ZNF484	ENSG00000127081.14_6	0.221	0.00214861	SE
chr1	227838656	227838777	+	52667	ZNF678	ENSG00000181450.18_6	-0.121	0.0426704	SE
chr1	74670074	74670140	+	52691	FPGT	ENSG00000254685.6_7	0.067	0.00259268	SE
chr2	175462328	175462586	-	52696	WIPF1	ENSG00000115935.17_7	-0.223	7.41048e-09	SE
chr1	192997004	192997085	-	52712	UCHL5	ENSG00000116750.13_10	0.075	0.00135963	SE
chr1	156195347	156195459	+	52747	PMF1	ENSG00000160783.19_8	-0.114	0.0855605	SE
chr2	178175691	178175763	-	52826	AC019080.1	ENSG00000213963.6_11	0.091	0.000321007	SE
chr12	120636356	120636434	-	52837	RPLP0	ENSG00000089157.16_8	-0.015	0.0363494	SE
chr12	120636356	120636542	-	52839	RPLP0	ENSG00000089157.16_8	-0.006	0.0186911	SE
chr3	129874106	129875137	+	52900	LINC02021	ENSG00000249846.7_8	0.282	0.0202333	SE
chr2	65316072	65316204	-	52902	RAB1A	ENSG00000138069.18_7	-0.043	0	SE
chr2	65318116	65318212	-	52904	RAB1A	ENSG00000138069.18_7	-0.055	0	SE
chr2	65318116	65318212	-	52905	RAB1A	ENSG00000138069.18_7	-0.173	0.032254	SE
chr11	74563033	74563127	-	52931	XRRA1	ENSG00000166435.15_9	0.111	0.00608498	SE
chr11	74570202	74570328	-	52935	XRRA1	ENSG00000166435.15_9	0.288	0.000154958	SE
chr11	74644845	74644917	-	52970	XRRA1	ENSG00000166435.15_9	-0.095	0.0108971	SE
chr11	74644869	74644917	-	52972	XRRA1	ENSG00000166435.15_9	-0.113	0.0221615	SE
chr19	48830086	48830179	+	52987	EMP3	ENSG00000142227.11_6	0.012	7.82201e-06	SE
chr2	3278109	3278190	-	53009	EIPR1	ENSG00000032389.13_11	-0.033	0.0533219	SE
chr15	23200630	23200789	-	53025	WHAMMP3	ENSG00000276141.4_5	-0.235	0.0831794	SE
chr2	232656442	232656518	+	53057	COPS7B	ENSG00000144524.18_4	0.026	0.00791879	SE
chr10	35437295	35437419	+	53069	CREM	ENSG00000095794.19_9	0.051	0.0679328	SE
chr10	35437295	35437419	+	53073	CREM	ENSG00000095794.19_9	0.029	0.0438974	SE
chr10	35477127	35477316	+	53086	CREM	ENSG00000095794.19_9	0.052	0.00808806	SE
chr10	35477127	35477316	+	53089	CREM	ENSG00000095794.19_9	0.102	0.000559553	SE
chr10	35490378	35490414	+	53093	CREM	ENSG00000095794.19_9	-0.076	0.0218555	SE
chr2	9547577	9547727	-	53238	ITGB1BP1	ENSG00000119185.13_7	0.02	0.00439378	SE
chr6	112020717	112020873	-	53321	FYN	ENSG00000010810.17_10	-0.131	0.000438421	SE
chr6	112021306	112021471	-	53324	FYN	ENSG00000010810.17_10	0.123	0.000115414	SE
chr2	10102583	10102660	+	53333	GRHL1	ENSG00000134317.18_5	-0.2	0.00544959	SE
chr1	145588377	145588470	-	53395	NUDT17	ENSG00000186364.12_6	0.05	0.0211228	SE
chr3	119219541	119219707	+	53422	TIMMDC1	ENSG00000113845.10_5	-0.016	0.00883832	SE
chr3	119222800	119222868	+	53426	TIMMDC1	ENSG00000113845.10_5	-0.032	0.010173	SE
chr2	131117180	131117219	+	53489	PTPN18	ENSG00000072135.13_6	0.116	0.0371003	SE
chr1	46072992	46074009	+	53535	NASP	ENSG00000132780.17_8	0.263	0	SE
chr1	46078840	46078920	+	53538	NASP	ENSG00000132780.17_8	-0.509	0.0219459	SE
chr8	22494037	22494099	-	53580	BIN3	ENSG00000147439.13_7	-0.018	0.0403124	SE
chr1	186400337	186400481	+	53602	PDC-AS1	ENSG00000229739.4_9	0.117	0.0689302	SE
chr19	45668384	45668452	-	53629	TRAPPC6A	ENSG00000007255.10_4	0.056	0.0469357	SE
chr19	10199786	10200054	+	53641	SHFL	ENSG00000130813.18_9	0.129	0.00629491	SE
chr14	30125681	30125705	-	53657	PRKD1	ENSG00000184304.16_8	-0.121	0.0103809	SE
chr12	115117717	115117777	-	53662	TBX3	ENSG00000135111.16_8	0.274	0.00469829	SE
chr3	49850080	49850171	-	53679	UBA7	ENSG00000182179.13_7	-0.118	0.011188	SE
chr2	20840732	20840940	-	53706	HS1BP3	ENSG00000118960.13_8	-0.015	0.011748	SE
chr2	20478343	20478580	-	53728	PUM2	ENSG00000055917.15_8	0.061	0.0553754	SE
chr3	20216496	20216547	-	53759	SGO1	ENSG00000129810.15_9	0.121	0.0572561	SE
chr11	110134684	110134959	-	53812	RDX	ENSG00000137710.17_8	0.038	0.000210454	SE
chr6	10724788	10724866	+	53828	TMEM14C	ENSG00000111843.14_5	-0.045	0.0916666	SE
chr6	10724788	10724866	+	53829	TMEM14C	ENSG00000111843.14_5	-0.298	0	SE
chr6	10724802	10724866	+	53832	TMEM14C	ENSG00000111843.14_5	0.066	2.44807e-05	SE
chr4	141214414	141214577	-	53842	SCOC-AS1	ENSG00000196951.11_10	-0.299	0.00333585	SE
chr2	37316782	37317009	+	53851	GPATCH11	ENSG00000152133.16_4	-0.068	0.000449149	SE
chr2	37317823	37317865	+	53852	GPATCH11	ENSG00000152133.16_4	-0.141	0.00999121	SE
chr19	5648999	5649510	+	53962	SAFB	ENSG00000160633.13_5	-0.026	0.0511918	SE
chr1	228296137	228296722	-	53979	MRPL55	ENSG00000162910.19_8	-0.018	0.0222984	SE
chr1	228296655	228296722	-	53985	MRPL55	ENSG00000162910.19_8	-0.027	0.085726	SE
chr4	39191275	39191401	+	54090	WDR19	ENSG00000157796.18_6	-0.074	0.00609173	SE
chr4	39201097	39201213	+	54093	WDR19	ENSG00000157796.18_6	-0.076	0.00273157	SE
chr16	70288293	70288386	-	54121	AARS1	ENSG00000090861.17_6	-0.012	0.0230159	SE
chr16	70291935	70292147	-	54128	AARS1	ENSG00000090861.17_6	-0.008	0.0199439	SE
chr15	78834824	78834987	+	54191	PSMA4	ENSG00000041357.16_6	0.007	0.0117798	SE
chr15	78834917	78834987	+	54193	PSMA4	ENSG00000041357.16_6	0.032	0.00687254	SE
chrX	78618919	78619051	-	54232	ITM2A	ENSG00000078596.11_6	0.028	0.0818965	SE
chr2	27911566	27911634	+	54250	SLC4A1AP	ENSG00000163798.13_6	-0.036	0.000355252	SE
chr19	53158813	53158940	-	54372	ZNF83	ENSG00000167766.18_6	-0.031	0.00738203	SE
chr11	66296782	66296959	-	54384	ZDHHC24	ENSG00000174165.8_6	-0.443	0.0574608	SE
chr11	111715323	111715446	-	54398	ALG9	ENSG00000086848.15_8	-0.02	0.0889935	SE
chr2	32157135	32157204	-	54471	MEMO1	ENSG00000162959.13_6	0.016	0.0980341	SE
chr2	39785122	39785187	+	54719	MAP4K3-DT	ENSG00000231312.7_10	0.112	0.0766439	SE
chr2	39811744	39811950	+	54724	MAP4K3-DT	ENSG00000231312.7_10	0.477	0.000792894	SE
chrX	73166833	73167209	+	54790	JPX	ENSG00000225470.8_7	-0.095	0.05403	SE
chrX	73182569	73182636	+	54794	JPX	ENSG00000225470.8_7	-0.185	0.012287	SE
chrX	73214674	73214796	+	54796	JPX	ENSG00000225470.8_7	0.04	0.0775497	SE
chrX	73219189	73220331	+	54807	JPX	ENSG00000225470.8_7	-0.058	0.0202333	SE
chr11	8933999	8934080	+	54813	AKIP1	ENSG00000166452.12_8	-0.068	0.0219942	SE
chr5	43533839	43533894	-	54873	PAIP1	ENSG00000172239.14_10	-0.01	0.0504884	SE
chr2	227704124	227704343	+	55038	RHBDD1	ENSG00000144468.17_9	-0.152	0.00312474	SE
chr2	39560672	39560715	-	55066	MAP4K3	ENSG00000011566.15_8	0.333	0.0409134	SE
chr2	39564666	39564722	-	55071	MAP4K3	ENSG00000011566.15_8	0.058	0.0515594	SE
chr2	135700181	135700244	+	55160	CCNT2	ENSG00000082258.13_6	-0.032	0.00973725	SE
chr1	223310519	223310605	-	55171	TLR5	ENSG00000187554.14_9	-0.092	0.0236046	SE
chr2	55200956	55201003	-	55195	RTN4	ENSG00000115310.18_8	-0.038	4.57422e-06	SE
chr2	55201830	55201900	-	55197	RTN4	ENSG00000115310.18_8	-0.02	1.60838e-06	SE
chr2	55252221	55254621	-	55201	RTN4	ENSG00000115310.18_8	0.1	0.00236759	SE
chr2	55255299	55255356	-	55204	RTN4	ENSG00000115310.18_8	-0.082	0.00383156	SE
chr1	245005245	245005360	+	55206	COX20	ENSG00000203667.10_5	0.06	0.000151489	SE
chr2	55407645	55407848	-	55207	CLHC1	ENSG00000162994.16_7	0.112	0.00666764	SE
chr2	55407645	55407848	-	55208	CLHC1	ENSG00000162994.16_7	0.129	0.000956804	SE
chr2	55408705	55408880	-	55209	CLHC1	ENSG00000162994.16_7	0.145	0.00628863	SE
chr10	101194395	101194516	+	55274	AL391684.1	ENSG00000224934.5_8	0.1	0.0962783	SE
chr2	61729130	61729175	-	55432	XPO1	ENSG00000082898.17_6	-0.04	0.00032681	SE
chr2	61729383	61729445	-	55433	XPO1	ENSG00000082898.17_6	-0.075	0.000375163	SE
chr8	97296336	97296381	+	55535	PTDSS1	ENSG00000156471.13_5	0.026	0.00887794	SE
chr8	97332473	97332573	+	55546	PTDSS1	ENSG00000156471.13_5	-0.278	0.000380809	SE
chr1	226488873	226488906	-	55566	LIN9	ENSG00000183814.15_5	0.128	0.0786945	SE
chr2	169707345	169707516	+	55622	NOSTRIN	ENSG00000163072.16_7	-0.033	0.0344275	SE
chr2	64069672	64069733	+	55633	UGP2	ENSG00000169764.15_7	0.031	0.000391395	SE
chr2	64084962	64085070	+	55637	UGP2	ENSG00000169764.15_7	-0.012	0.0441189	SE
chr1	155110036	155110198	+	55660	SLC50A1	ENSG00000169241.19_6	-0.018	0.00658558	SE
chr19	39911588	39911636	+	55663	PLEKHG2	ENSG00000090924.15_7	0.081	0.0148099	SE
chr2	64456978	64457092	+	55672	AC012368.1	ENSG00000225889.9_8	-0.102	0.000451905	SE
chr10	46246929	46247001	+	55784	WASHC2C	ENSG00000172661.19_5	-0.044	0.000406819	SE
chr10	46264896	46265066	+	55786	WASHC2C	ENSG00000172661.19_5	0.037	0.00627586	SE
chr10	46264902	46265066	+	55787	WASHC2C	ENSG00000172661.19_5	0.061	0.00530638	SE
chr6	56993526	56993638	+	55822	ZNF451	ENSG00000112200.17_8	0.02	0.0878142	SE
chr2	68280192	68280418	-	55887	C1D	ENSG00000197223.11_5	0.078	0.0948143	SE
chr2	68740211	68740359	+	55919	APLF	ENSG00000169621.10_7	0.053	0.013007	SE
chr19	49458943	49459090	+	56057	BAX	ENSG00000087088.20_7	0.013	0.00661041	SE
chr7	99750338	99750380	+	56121	LAMTOR4	ENSG00000188186.10_4	-0.015	0.0131274	SE
chr2	70215577	70215637	-	56131	PCBP1-AS1	ENSG00000179818.14_7	-0.224	0.00480613	SE
chr2	70280862	70280947	-	56174	PCBP1-AS1	ENSG00000179818.14_7	-0.194	0.0563103	SE
chr2	70308501	70308622	-	56215	PCBP1-AS1	ENSG00000179818.14_7	0.078	0.00979897	SE
chr2	71615752	71615853	+	56280	ZNF638	ENSG00000075292.19_6	0.078	0.011947	SE
chr16	77769724	77769883	+	56306	NUDT7	ENSG00000140876.11_7	-0.187	0.0520687	SE
chr2	74369398	74369487	-	56415	BOLA3	ENSG00000163170.12_6	-0.071	0.0302078	SE
chr10	70500385	70500418	+	56440	CCAR1	ENSG00000060339.14_9	-0.226	0.00784401	SE
chr11	47281341	47281530	+	56494	NR1H3	ENSG00000025434.19_7	0.172	0.055532	SE
chr11	47281959	47282226	+	56495	NR1H3	ENSG00000025434.19_7	0.081	0.0276466	SE
chr11	47283097	47283277	+	56498	NR1H3	ENSG00000025434.19_7	-0.041	0.0530855	SE
chr2	74590740	74590755	-	56527	DCTN1	ENSG00000204843.12_8	-0.08	3.72907e-07	SE
chr2	74691622	74691849	-	56543	MOGS	ENSG00000115275.14_9	-0.015	0.0943364	SE
chr5	43453759	43454145	-	56550	TMEM267	ENSG00000151881.14_10	0.044	6.91515e-05	SE
chr5	43479991	43480089	-	56563	TMEM267	ENSG00000151881.14_10	-0.176	0.00833425	SE
chr1	235628952	235629031	-	56614	B3GALNT2	ENSG00000162885.14_6	-0.039	0.0214874	SE
chr1	235628952	235629031	-	56615	B3GALNT2	ENSG00000162885.14_6	-0.081	0.0241567	SE
chr1	235652472	235652573	-	56621	B3GALNT2	ENSG00000162885.14_6	-0.121	1.34967e-07	SE
chr2	75929324	75929549	-	56637	GCFC2	ENSG00000005436.14_9	-0.041	0.0385195	SE
chr2	75929438	75929549	-	56638	GCFC2	ENSG00000005436.14_9	-0.077	0.0854766	SE
chr10	102140651	102140866	+	56676	OLMALINC	ENSG00000235823.3_7	-0.131	0.00120858	SE
chr10	102140739	102140866	+	56677	OLMALINC	ENSG00000235823.3_7	-0.099	0.00255758	SE
chr19	4324451	4324526	-	56756	STAP2	ENSG00000178078.12_7	0.095	0.031872	SE
chr8	144799863	144799962	+	56795	MAPK15	ENSG00000181085.15_5	0.054	0.0421323	SE
chr8	144803169	144803275	+	56796	MAPK15	ENSG00000181085.15_5	-0.09	0.0293273	SE
chr2	85823944	85824054	+	56877	RNF181	ENSG00000168894.10_8	0.013	0.0380925	SE
chr8	58131614	58131697	+	56907	LINC01606	ENSG00000253301.6_9	-0.168	0.0119907	SE
chr8	58134727	58134830	+	56911	LINC01606	ENSG00000253301.6_9	0.224	0.00296372	SE
chr2	132446711	132446925	+	56975	C2orf27A	ENSG00000287151.1_3	-0.129	0.00834922	SE
chr5	64859629	64859666	+	56995	PPWD1	ENSG00000113593.12_5	-0.037	0.0296296	SE
chr5	64867665	64868113	+	56999	PPWD1	ENSG00000113593.12_5	-0.02	0.021972	SE
chr15	52856386	52856443	-	57056	ARPP19	ENSG00000128989.11_5	-0.033	0.0786256	SE
chr8	76236455	76236568	-	57067	CASC9	ENSG00000249395.4_8	-0.106	0.032621	SE
chr11	67382359	67382410	-	57086	DOC2GP	ENSG00000231793.5_5	0.264	0.00470868	SE
chr11	67382541	67382676	-	57090	DOC2GP	ENSG00000231793.5_5	-0.114	0.00194177	SE
chr12	1035961	1036112	-	57105	RAD52	ENSG00000002016.18_8	0.328	0.00143965	SE
chr3	75488904	75488997	+	57116	LINC02018	ENSG00000272690.6_8	-0.28	0.000106608	SE
chr3	75488935	75488997	+	57118	LINC02018	ENSG00000272690.6_8	-0.218	0.00591075	SE
chr12	42745686	42745851	+	57140	PPHLN1	ENSG00000134283.18_7	0.151	2.49601e-08	SE
chr17	26207146	26207209	-	57187	LYRM9	ENSG00000232859.10_6	-0.16	0.0998081	SE
chr2	95596530	95596605	-	57293	AC097374.1	ENSG00000259848.9_9	0.048	0.049975	SE
chr19	9678323	9678381	-	57296	ZNF121	ENSG00000197961.11_5	0.055	0.0240441	SE
chr2	179204398	179204491	+	57338	OSBPL6	ENSG00000079156.17_6	0.11	0.034523	SE
chr2	179209012	179209087	+	57340	OSBPL6	ENSG00000079156.17_6	-0.023	0.0382281	SE
chr2	97007787	97007878	+	57417	NCAPH	ENSG00000121152.10_7	-0.574	0.00284672	SE
chr2	97215057	97215196	+	57428	ARID5A	ENSG00000196843.17_6	-0.103	0.0740001	SE
chr18	13730625	13730754	+	57429	RNMT	ENSG00000101654.18_7	-0.17	9.50237e-05	SE
chr2	97586901	97586999	-	57466	FAM178B	ENSG00000168754.15_9	-0.025	0.0114264	SE
chr3	167443188	167443261	-	57485	PDCD10	ENSG00000114209.15_7	0.161	0.0137295	SE
chr2	99232669	99232809	+	57531	UNC50	ENSG00000115446.12_4	0.019	0.0303251	SE
chr2	99735013	99735149	-	57541	TSGA10	ENSG00000135951.16_7	-0.189	0.000194627	SE
chr12	7519831	7519927	-	57559	CD163L1	ENSG00000177675.9_6	0.056	0.0852968	SE
chr1	155935421	155935551	-	57598	ARHGEF2	ENSG00000116584.20_9	-0.013	0.0095799	SE
chr2	102984284	102984528	+	57649	IL18R1	ENSG00000115604.10_7	0.031	0.0765589	SE
chr3	37892914	37892983	-	57709	ITGA9-AS1	ENSG00000235257.9_11	-0.366	0.00600852	SE
chr15	23338852	23339028	-	57745	HERC2P2	ENSG00000276550.4_4	0.05	0.0382494	SE
chr15	23356105	23356220	-	57747	HERC2P2	ENSG00000276550.4_4	0.056	0.0427904	SE
chr12	19443610	19443730	+	57789	PLEKHA5	ENSG00000052126.14_7	0.69	0.000938351	SE
chr6	41086662	41086846	+	57891	ADCY10P1	ENSG00000161912.18_6	0.056	0.0448112	SE
chr6	41100032	41100252	+	57904	ADCY10P1	ENSG00000161912.18_6	0.077	0.00353281	SE
chr6	41100613	41100739	+	57905	ADCY10P1	ENSG00000161912.18_6	-0.139	0.000496566	SE
chr6	41105961	41106080	+	57916	ADCY10P1	ENSG00000161912.18_6	-0.331	0.0682525	SE
chr1	231079551	231079644	-	57973	TTC13	ENSG00000143643.13_7	0.199	0.000704036	SE
chr1	231081134	231081200	-	57975	TTC13	ENSG00000143643.13_7	0.137	0.000164654	SE
chr20	30742905	30742989	+	57988	TM9SF4	ENSG00000101337.16_7	0.017	0.0673334	SE
chr2	113480074	113480166	+	58062	NT5DC4	ENSG00000144130.11_3	0.421	0.00258757	SE
chr6	3002283	3002520	+	58082	NQO2	ENSG00000124588.21_6	0.074	0.00260225	SE
chr6	3003902	3004023	+	58084	NQO2	ENSG00000124588.21_6	0.146	0.000300953	SE
chr6	3007049	3007169	+	58093	NQO2	ENSG00000124588.21_6	-0.029	0.000801718	SE
chr6	3015763	3015877	+	58099	NQO2	ENSG00000124588.21_6	0.032	0.000166609	SE
chr1	186355119	186355215	+	58113	ODR4	ENSG00000157181.16_7	-0.057	8.21879e-05	SE
chr1	186360827	186360923	+	58115	ODR4	ENSG00000157181.16_7	-0.398	0.0130712	SE
chr3	112289386	112289517	+	58174	SLC35A5	ENSG00000138459.9_8	-0.061	0.0204263	SE
chr6	41877006	41877260	-	58230	MED20	ENSG00000124641.16_8	-0.027	0.00221959	SE
chr6	41877082	41877260	-	58232	MED20	ENSG00000124641.16_8	-0.037	0.00185452	SE
chr6	41877082	41877260	-	58233	MED20	ENSG00000124641.16_8	-0.025	0.0808406	SE
chr19	11650109	11650375	+	58249	CNN1	ENSG00000130176.8_6	0.034	0.0106982	SE
chr19	11650109	11650384	+	58250	CNN1	ENSG00000130176.8_6	0.036	0.00409203	SE
chr2	201747064	201747158	-	58261	PPIL3	ENSG00000240344.9_6	0.083	0.0854013	SE
chr2	175111442	175111543	-	58332	OLA1	ENSG00000138430.16_6	0.018	0.00187144	SE
chr2	127808729	127808819	-	58364	BIN1	ENSG00000136717.15_8	0.203	0.0384454	SE
chr6	139238691	139238761	-	58428	REPS1	ENSG00000135597.19_7	-0.025	0.0388695	SE
chr7	74312525	74312628	+	58503	PMS2P5	ENSG00000123965.13_7	-0.095	0.0101726	SE
chr16	84014443	84014469	+	58543	NECAB2	ENSG00000103154.9_5	-0.507	0.000885463	SE
chr9	128268588	128268696	-	58581	MAPKAP1	ENSG00000119487.17_9	-0.102	0.0011596	SE
chr12	101796642	101796724	-	58856	ARL1	ENSG00000120805.14_7	-0.299	0.00466329	SE
chr4	148984298	148984451	+	58935	ARHGAP10	ENSG00000071205.12_5	0.263	0.00888711	SE
chr12	63963003	63963129	-	59003	DPY19L2	ENSG00000177990.12_7	0.096	0.0813376	SE
chr12	64017819	64017911	-	59009	DPY19L2	ENSG00000177990.12_7	0.517	0.0987252	SE
chr11	18347493	18347700	+	59112	GTF2H1	ENSG00000110768.12_5	0.027	0.0943532	SE
chr11	18373427	18373516	+	59122	GTF2H1	ENSG00000110768.12_5	-0.023	0.000972219	SE
chr2	152668870	152668954	-	59168	ARL5A	ENSG00000162980.17_7	-0.009	0.0334923	SE
chrX	43147403	43147500	+	59179	AL023574.1	ENSG00000285899.1_2	0.074	0.0674403	SE
chrX	43254533	43254643	+	59181	AL023574.1	ENSG00000285899.1_2	0.237	0.00712914	SE
chrX	43265717	43265799	+	59186	AL023574.1	ENSG00000285899.1_2	-0.187	0.0141787	SE
chr2	48586185	48586286	+	59204	FOXN2	ENSG00000170802.16_7	-0.059	0.00205475	SE
chr2	48589781	48589846	+	59206	FOXN2	ENSG00000170802.16_7	-0.136	0.000552583	SE
chr2	158675914	158676001	-	59218	ACVR1	ENSG00000115170.15_6	0.319	0.0309567	SE
chr2	158716544	158716691	-	59227	ACVR1	ENSG00000115170.15_6	-0.409	0.0161711	SE
chrX	30686128	30686235	+	59307	GK	ENSG00000198814.12_8	0.06	0.0027258	SE
chr2	168795752	168795807	-	59504	B3GALT1-AS1	ENSG00000235335.3_9	-0.126	0.0716675	SE
chr5	1324877	1324928	-	59516	CLPTM1L	ENSG00000049656.14_6	0.016	0.00207636	SE
chr2	170734003	170734147	+	59570	UBR3	ENSG00000144357.17_6	0.035	0.0356873	SE
chr2	171811159	171811292	+	59597	GORASP2	ENSG00000115806.13_5	0.015	0.022231	SE
chr2	171812945	171813069	+	59598	GORASP2	ENSG00000115806.13_5	0.012	0.00911857	SE
chr17	79892201	79892365	-	59632	PYCR1	ENSG00000183010.17_9	-0.021	0.0176325	SE
chr10	34573062	34573173	-	59853	PARD3	ENSG00000148498.16_9	0.083	0.0660697	SE
chr10	34661425	34661464	-	59858	PARD3	ENSG00000148498.16_9	-0.206	3.22601e-10	SE
chr10	34739244	34739376	-	59864	PARD3	ENSG00000148498.16_9	0.077	0.000607364	SE
chr5	141732790	141733148	+	59908	SPRY4-AS1	ENSG00000231185.7_10	-0.071	0.000660292	SE
chr5	141770485	141770616	+	59909	SPRY4-AS1	ENSG00000231185.7_10	-0.32	3.25763e-05	SE
chr8	106799294	106799449	-	59930	ZFPM2-AS1	ENSG00000251003.9_8	0.024	0.0879942	SE
chr8	106939878	106939945	-	59933	ZFPM2-AS1	ENSG00000251003.9_8	0.143	0.00678608	SE
chr8	107071308	107071364	-	59935	ZFPM2-AS1	ENSG00000251003.9_8	-0.146	0.00183421	SE
chr2	183951767	183951920	+	59982	DUSP19	ENSG00000162999.13_5	0.101	0.0120984	SE
chr2	61410681	61410797	+	60004	AHSA2P	ENSG00000173209.23_7	-0.056	0.0992883	SE
chr19	38264300	38264391	-	60021	ZNF573	ENSG00000189144.13_7	0.068	0.0594565	SE
chr3	105572257	105572508	-	60027	CBLB	ENSG00000114423.23_11	-0.044	0.00588264	SE
chr2	191159271	191159356	-	60144	HIBCH	ENSG00000198130.16_7	0.023	0.01765	SE
chr6	10749854	10749931	+	60174	TMEM14B	ENSG00000137210.14_8	0.014	0.0384014	SE
chr19	36562457	36562618	+	60210	WDR62	ENSG00000075702.18_7	0.032	0.0477351	SE
chr19	36581346	36581422	+	60215	WDR62	ENSG00000075702.18_7	-0.028	0.0735758	SE
chr2	202207092	202207154	-	60380	FLACC1	ENSG00000155749.12_9	-0.487	0.0753204	SE
chr2	202212976	202213025	-	60381	FLACC1	ENSG00000155749.12_9	0.379	0.000752751	SE
chr17	76198783	76198832	+	60399	AFMID	ENSG00000183077.15_4	-0.267	0.002583	SE
chr17	76202026	76202131	+	60426	AFMID	ENSG00000183077.15_4	-0.038	0.025407	SE
chr2	203084754	203084829	-	60437	SUMO1	ENSG00000116030.17_5	-0.014	0.03936	SE
chr2	203980707	203980793	+	60532	NBEAL1	ENSG00000144426.18_5	-0.184	0.0420512	SE
chr5	149389673	149390171	+	60563	HMGXB3	ENSG00000113716.13_6	-0.033	0.0275703	SE
chr1	32694327	32694417	+	60593	EIF3I	ENSG00000084623.11_4	-0.178	0.00354309	SE
chr1	242012413	242012518	+	60629	EXO1	ENSG00000174371.17_6	-0.097	0.00310496	SE
chr1	242015593	242015713	+	60635	EXO1	ENSG00000174371.17_6	0.017	0.0137245	SE
chr17	40963672	40963815	-	60644	BECN1	ENSG00000126581.13_7	0.034	0.0626638	SE
chr1	167985018	167985189	+	60676	DCAF6	ENSG00000143164.15_5	0.078	0.0232649	SE
chr1	167992225	167992285	+	60677	DCAF6	ENSG00000143164.15_5	0.077	0.0798203	SE
chr1	168007608	168007726	+	60680	DCAF6	ENSG00000143164.15_5	-0.021	0.0213343	SE
chr3	196096291	196096382	-	60703	UBXN7	ENSG00000163960.12_7	-0.022	0.00970721	SE
chr4	135247700	135247795	-	60735	AC015631.1	ENSG00000251199.6_10	-0.301	0.0544024	SE
chr11	32458615	32458743	+	60739	WT1-AS	ENSG00000183242.12_7	-0.225	0.0142051	SE
chr3	10360822	10360856	-	60830	SEC13	ENSG00000157020.18_7	-0.192	0.032907	SE
chr3	10360822	10361000	-	60833	SEC13	ENSG00000157020.18_7	-0.147	0.040786	SE
chr5	141387363	141387465	-	60847	GNPDA1	ENSG00000113552.16_9	-0.046	2.37389e-12	SE
chrX	130502341	130502423	-	60862	IGSF1	ENSG00000147255.19_10	0.162	0.0633021	SE
chr1	161748033	161748110	+	60996	ATF6	ENSG00000118217.6_6	0.031	1.20138e-06	SE
chr11	85981124	85981199	+	61143	EED	ENSG00000074266.21_7	-0.093	0.000156645	SE
chr5	36170445	36170544	+	61252	SKP2	ENSG00000145604.16_6	0.379	6.83683e-05	SE
chr7	30921795	30921976	+	61276	AC004691.2	ENSG00000250424.4_9	-0.073	9.05472e-05	SE
chr7	30951607	30951908	+	61278	AC004691.2	ENSG00000250424.4_9	-0.089	0.0966146	SE
chr16	23578307	23578390	+	61343	UBFD1	ENSG00000103353.16_7	-0.023	0.00537875	SE
chr6	43274183	43274255	-	61363	CRIP3	ENSG00000146215.14_6	0.095	0.0695681	SE
chr14	58958861	58958993	+	61396	KIAA0586	ENSG00000100578.18_10	0.048	0.0275756	SE
chr14	59010600	59010685	+	61404	KIAA0586	ENSG00000100578.18_10	0.269	0.0213408	SE
chr12	11126253	11126320	-	61465	AC018630.2	ENSG00000275778.2_10	0.189	0.00558615	SE
chr12	11187380	11187484	-	61469	AC018630.2	ENSG00000275778.2_10	0.609	0.0010664	SE
chr12	11187380	11187484	-	61472	AC018630.2	ENSG00000275778.2_10	0.173	0.00914668	SE
chr12	11199618	11199787	-	61476	AC018630.2	ENSG00000275778.2_10	-0.032	0.0675756	SE
chr1	31810021	31810122	+	61496	ZCCHC17	ENSG00000121766.16_6	-0.013	0.0245147	SE
chr9	146101	146158	-	61599	CBWD1	ENSG00000172785.18_6	0.258	0.0757887	SE
chr9	152033	152078	-	61600	CBWD1	ENSG00000172785.18_6	0.084	0.0107994	SE
chr9	152033	152078	-	61602	CBWD1	ENSG00000172785.18_6	0.038	0.0713631	SE
chr10	35790428	35790463	+	61693	CCNY	ENSG00000108100.18_5	-0.15	0.000663592	SE
chr10	35805450	35805551	+	61702	CCNY	ENSG00000108100.18_5	-0.047	0.0257704	SE
chr19	37345351	37345496	+	61728	ZNF345	ENSG00000251247.11_10	0.131	0.0310232	SE
chr2	24536328	24536392	-	61743	ITSN2	ENSG00000198399.14_8	-0.047	0.0106272	SE
chr4	16204084	16204203	-	61818	TAPT1	ENSG00000169762.17_6	0.042	0.0021168	SE
chr3	4459693	4459816	-	61884	SUMF1	ENSG00000144455.14_7	0.092	0.0176443	SE
chr19	35657044	35657074	+	61910	FXYD5	ENSG00000089327.15_7	-0.353	0.0481496	SE
chr19	35657044	35657074	+	61912	FXYD5	ENSG00000089327.15_7	-0.107	0.0556055	SE
chr2	34080754	34080820	+	62010	LINC01320	ENSG00000228262.10_10	0.373	0.0343612	SE
chr19	53456003	53456130	-	62033	ZNF816-ZNF321P	ENSG00000221874.4_5	-0.043	0.0876704	SE
chr3	9800870	9800970	+	62084	OGG1	ENSG00000114026.21_7	-0.056	0.0649815	SE
chr19	5610649	5610699	-	62100	SAFB2	ENSG00000130254.12_7	-0.045	0.0887775	SE
chr1	35835629	35835714	+	62138	ZMYM4	ENSG00000146463.12_6	0.121	0.0527502	SE
chr3	121441108	121441225	-	62265	GOLGB1	ENSG00000173230.15_10	0.065	0.0722012	SE
chr1	219323280	219323373	-	62277	LYPLAL1-DT	ENSG00000228063.2_10	-0.381	0.0655398	SE
chr5	114605399	114605495	-	62278	CCDC112	ENSG00000164221.13_7	0.113	0.0484554	SE
chr1	160194851	160194909	-	62283	DCAF8	ENSG00000132716.19_8	-0.033	0.000505766	SE
chr6	68596859	68596961	-	62315	AL713998.1	ENSG00000227706.4_10	0.035	0.0955199	SE
chr6	68596859	68598713	-	62317	AL713998.1	ENSG00000227706.4_10	0.019	0.0115871	SE
chr7	153101141	153101687	-	62326	LINC01287	ENSG00000234722.5_9	0.352	3.9879e-05	SE
chr7	153104040	153104169	-	62329	LINC01287	ENSG00000234722.5_9	0.354	0.0595076	SE
chr7	153104040	153104169	-	62332	LINC01287	ENSG00000234722.5_9	0.067	0.0620578	SE
chr7	153109175	153110567	-	62340	LINC01287	ENSG00000234722.5_9	0.058	0.0334461	SE
chr7	153109175	153110567	-	62341	LINC01287	ENSG00000234722.5_9	0.151	0.0216007	SE
chr6	74183087	74183377	+	62471	MTO1	ENSG00000135297.16_5	0.012	0.0899148	SE
chr6	74207458	74207619	+	62485	MTO1	ENSG00000135297.16_5	-0.022	0.024085	SE
chr6	76003208	76003310	+	62529	TMEM30A-DT	ENSG00000225793.3_9	0.354	0.0863918	SE
chr1	40318402	40318548	-	62577	TRIT1	ENSG00000043514.17_8	0.021	0.0966739	SE
chr2	69014971	69015088	+	62603	ARHGAP25	ENSG00000163219.12_5	0.052	0.00470138	SE
chr7	156758963	156759096	+	62618	NOM1	ENSG00000146909.8_5	0.022	0.0971814	SE
chr7	156759654	156759786	+	62621	NOM1	ENSG00000146909.8_5	0.027	0.0678274	SE
chr11	33890891	33891132	-	62656	LMO2	ENSG00000135363.12_6	0.044	0.0285025	SE
chr11	33891255	33891533	-	62657	LMO2	ENSG00000135363.12_6	-0.079	0.0291969	SE
chr11	33903369	33903433	-	62659	LMO2	ENSG00000135363.12_6	0.038	0.0770298	SE
chr4	159881437	159881496	-	62694	C4orf45	ENSG00000164123.7_6	-0.182	0.0546108	SE
chr11	35747471	35747711	+	62707	TRIM44	ENSG00000166326.7_5	0.008	0.0689303	SE
chr6	86387512	86387586	-	62725	SNHG5	ENSG00000203875.13_9	0.019	0.0729503	SE
chr6	86387512	86387586	-	62726	SNHG5	ENSG00000203875.13_9	0.013	0.0481833	SE
chr6	86387512	86387593	-	62731	SNHG5	ENSG00000203875.13_9	0.013	0.049904	SE
chr6	86387512	86387617	-	62732	SNHG5	ENSG00000203875.13_9	0.019	0.0839261	SE
chr7	20922358	20922435	+	62828	LINC01162	ENSG00000232790.3_8	-0.904	3.27742e-09	SE
chr7	21061675	21061769	+	62835	LINC01162	ENSG00000232790.3_8	-0.339	0.0093268	SE
chr6	90087389	90087532	-	62892	RRAGD	ENSG00000025039.15_6	-0.045	0.0929253	SE
chr17	58163292	58163487	-	62933	WFDC21P	ENSG00000261040.7_7	0.602	0.0154037	SE
chr11	3721839	3722069	-	62991	NUP98	ENSG00000110713.17_8	-0.012	0.0513946	SE
chr6	99825261	99825361	-	63117	COQ3	ENSG00000132423.12_7	-0.251	0.0211757	SE
chr6	99893672	99894339	-	63145	USP45	ENSG00000123552.18_7	0.078	0.0050494	SE
chr6	106756238	106756366	-	63230	ATG5	ENSG00000057663.16_8	0.045	0.0134068	SE
chr6	107427280	107427366	-	63262	BEND3	ENSG00000178409.14_4	0.291	0.0250047	SE
chr9	13122085	13122169	-	63343	MPDZ	ENSG00000107186.16_8	0.081	0.00024381	SE
chr9	13143464	13143563	-	63345	MPDZ	ENSG00000107186.16_8	-0.047	0.0975687	SE
chr3	38167652	38167832	-	63378	ACAA1	ENSG00000060971.19_7	0.02	0.0382221	SE
chr22	24447286	24447436	+	63485	CABIN1	ENSG00000099991.18_9	0.019	0.0740168	SE
chr6	111680024	111680217	-	63512	REV3L	ENSG00000009413.16_7	-0.041	0.0599281	SE
chr6	112405391	112405449	-	63526	TUBE1	ENSG00000074935.14_6	0.087	1.86903e-05	SE
chr8	59352191	59352329	+	63578	UBXN2B	ENSG00000215114.10_5	0.028	0.0637586	SE
chr19	8527412	8527465	+	63619	HNRNPM	ENSG00000099783.12_9	-0.008	0.0181554	SE
chr19	8548041	8548095	+	63639	HNRNPM	ENSG00000099783.12_9	0.031	0.0591629	SE
chr22	19459209	19459331	-	63673	UFD1	ENSG00000070010.19_10	0.025	0.000269909	SE
chr22	19462590	19462623	-	63677	UFD1	ENSG00000070010.19_10	0.059	0.00983483	SE
chr22	19462992	19463125	-	63678	UFD1	ENSG00000070010.19_10	0.035	0.000935922	SE
chr8	38050205	38050313	+	63680	BAG4	ENSG00000156735.11_5	-0.077	0.024838	SE
chr11	118942305	118942553	+	63684	VPS11	ENSG00000160695.15_4	-0.024	0.0107458	SE
chr11	118943907	118944109	+	63685	VPS11	ENSG00000160695.15_4	-0.028	0.00861398	SE
[truncated: 26,584 more rows]
